# Supplementary material for: Inputs drive cell phenotype variability
Source: HighWire-hosted journal article supplement (doi:10.1101/gr.161802.113), 2014-03-26

# Inputs Drive Cell Phenotype Variability

## Supplemental Information

James Park<sup>1,2†</sup>, Anthony Brureau<sup>1†</sup>, Kate Kernan<sup>3</sup>, Alexandria Starks<sup>1</sup>, Sonali Gulati<sup>1</sup>, Babatunde Ogunnaike<sup>2</sup>, James Schwaber<sup>1,2\*</sup>, Rajanikanth Vadigepalli<sup>1,2\*</sup>

<sup>1</sup>Daniel Baugh Institute for Functional Genomics and Computational Biology, Department of Pathology, Anatomy and Cell Biology, Jefferson Medical College, Thomas Jefferson University, Philadelphia, PA 19107

<sup>2</sup>Department of Chemical and Biochemical Engineering, University of Delaware, Newark, Delaware 19716

<sup>3</sup>Department of Pediatrics, Washington University Saint Louis, Saint Louis, Missouri 63130

\* Correspondence to: [James.Schwaber@jefferson.edu](mailto:James.Schwaber@jefferson.edu)  
[Rajanikanth.Vadigepalli@jefferson.edu](mailto:Rajanikanth.Vadigepalli@jefferson.edu)

† contributed equally to the present work

# Material and Methods

## Animals

Male, Sprague-Dawley rats (270-280g, Charles River, Wilmington, MA) were housed two per cage in the Thomas Jefferson animal facility. Facilities were maintained at constant temperature and humidity with 12/12 hour light cycles (lights on at Zeitgeber time 0).

The TJU Institutional Animal Care and Use Committee approved all protocols.

## Acute Hypertension Challenge

Each rat was placed into an induction chamber to induce anaesthesia (isoflurane 5% in oxygen), Piramal, Bethlehem, PA). Once the rat was anesthetized, he was moved to the surgical station and remained under anaesthesia throughout the procedure (isoflurane 2% in oxygen). The common iliac vein and artery were cannulated for delivery of pharmaceuticals (phenylephrine, or saline solution) and blood pressure measurement.

The fur around the incision site was shaved with a non-irritating electric razor, and the area was disinfected with Betadine (Purdue Products LP, Stamford, CT). A single incision was made and the subcutaneous fat and fascia was cleared away. The ascending branch of the internal iliac artery was tied off and cut to prevent blood flow and to provide access to the common iliac artery and vein. Sterile packs of braided silk (Harvard Apparatus, Holliston, MA) were used to tie off these vessels and for all other processes in the surgery. The common iliac artery and vein are separated from each other and from the sciatic nerve. Any other small feed sources to either the vein or artery within the region to be cannulated were tied off and cut. The artery was then tied closed at the distal end and clamped with a hemostat approximately half an inch proximally. The artery was sliced open and a cannula was inserted. This cannula contains 4U per mL heparin (APP Pharmaceuticals, Schaumburg, IL) to prevent coagulation in saline. Then the cannula was tied securely in place within the vessel. The cannulation procedure was repeated for the common iliac vein with a cannula containing only saline. The cannulae were then tied firmly in place. To prevent the animal from pulling out or chewing through the cannulae, a small incision was made in the skin between the scapulae and the cannulae are fed subcutaneously to this exit incision. The leg wound was sutured closed and 2% lidocaine gel was applied topically. Lidocaine was also applied topically to the small wound between the scapulae, and the animal was returned to a bedded box to recover from the anesthetic. During this recovery period, the animal was housed alone.

The animal was allowed to move freely in the bedded box for at least one hour to recover from anesthesia. The animal's blood pressure was monitored (LabView, National Instruments, Austin, TX) and recorded during this time and throughout the experiment via the arterial cannula. Unprovoked increases in blood pressure were avoided as potentially indicating increased pain or distress for the animal.

The animals fell within two experimental groups: hypertensive (n=4) and baseline normotensive (n=2). During the infusion period (1h), the hypertensive animal received phenylephrine and the control animal received an equivalent amount of saline without phenylephrine. Both solutions were delivered via the venous cannula. In the hypertensive animal, hypertension was induced and maintained using a phenylephrine concentration that was titrated to maintain a blood pressure level 40mmHg higher than baseline. The infusion rate and dosage were maintained by an adjustable pump: the rate of delivery was adjusted as needed.

### **NTS Tissue Sections**

Once the desired time point is reached, the rat was sacrificed via rapid decapitation and the brainstem was immediately frozen in OCT block (TissueTek, QIAGEN, Valencia, CA). The brainstem blocks were sectioned at 10µm, and thaw mounted on glass slides. Tissue sections were taken throughout the intermediate levels of the NTS co-extensive with the *area postrema* using a cryostat.

### **Immunohistochemistry Staining**

To preserve RNA, immunostaining was performed within 30 minutes using an accelerated protocol. Slides were first fixed in cold Acetone and hydrogen peroxide (Sigma-aldrich, 50ml: 50µl) for 1 minute, then blocked and permeabilized with PBS containing 2% BSA (Sigma–Aldrich) for 30 seconds. Afterwards, brain sections were incubated with the primary antibody anti-Tyrosine Hydroxylase (TH) 1/25 (Pel-Freez® Biologicals, Roger, AR) or anti-*c-Fos* for 2 minutes at room temperature. Then the slides were washed, and were incubated for 3 minutes at room temperature in the dark with the secondary antibody Alexa-488 anti-rabbit 1/50 (Life Technologies, Grand Island, NY) with PBS containing 2% BSA. Then slides were rinsed with PBS and dehydrated in graduated ethanol concentrations and in xylene for 5 min.

### **Laser Capture Microdissection (LCM)**

The LCM process was performed using a PixCell system and CapSure Macro LCM caps (Arcturus Engineering, Mountain View, CA). The NTS was localized using anatomical landmarks and cells with positive staining (*Th*+ or *c-Fos*+) were lifted individually on caps.

The annulus for the Laser was adjusted to the size of immuno-labeled neurons, the neuron was lifted and screened for quality as a whole cell on the cap after capture and only accepted if the cell target was fully lifted. During single cell sampling both the tissue and the corresponding cap were inspected for the removed cell body to ensure that the fluoresced neuron of interest is collected, as demonstrated in Fig. 1A and Fig. 2A-B. The precise nature of the near-IR laser allowed us to collect an intact cell body 7.5µm in diameter from the 10µm thick tissue slices. The pre- and post-laser-microdissection inspections in conjunction with the precise nature of the near-IR laser minimized the possibility of any gross contamination from occurring.

Lysis buffer was added onto the single cell on the cap (5.5µl; Life Technologies, Grand Island, NY) and cooled on ice before storage at -80°C. Approximately 10 single NTS neurons were lifted from each immuno-stained tissue section.

### High-throughput quantitative PCR

Our sample preparation does not isolate RNA from a single cell sample, but processes the single neurons directly in a reverse transcriptase reaction, which is followed by real-time PCR for targeted amplification and detection using the Roche Universal Probe Library based approach. In this PCR scheme, the signal is derived from a fluorescently labeled probe that binds to the amplicon of interest, providing additional specificity beyond the typical intercalated dye based approaches to detect the PCR amplified product.

Intron-spanning PCR primers and probes for every assay were designed using Roche's Universal Probe Library Assay Design Center ([www.universalprobelibrary.com](http://www.universalprobelibrary.com)) Table S3). The standard BioMark™ protocol was used to pre-amplify cDNA samples for 20 cycles using TaqMan® PreAmp Master Mix per the manufacturer's protocol (Applied Biosystems, Foster City, CA). qPCR reactions were performed using 96.96 BioMark™ Dynamic Arrays (Fluidigm®, South San Francisco, CA) enabling quantitative measurement of multiple mRNAs and samples under identical reaction conditions (Spurgeon et al. 2008). Each run consisted of 40 amplification cycles (15s at 95°C, 5s at 70°C, 60s at 60°C). C<sub>t</sub> values were calculated by the Real-Time PCR Analysis Software (Fluidigm).

Four 96.96 BioMark™ Arrays were used to measure gene expression across the 300 single cell samples. The same serial dilution sample set was included to verify reproducibility and test for technical variability. A chip to chip comparison of the serial dilution samples demonstrates that the BioMark™ Dynamic Arrays are capable of high reproducibility with minimal technical variability (Fig. S1).

### Data Normalization

Individual qRT-PCR results were examined to determine the quality of the qRT-PCR. An initial pass-fail-no call assessment was made for each reaction based on the qualitative nature of the reaction curves obtained from the PCR. Following this initial review, both *samples* and *gene* assays having greater than 30% failed reactions were excluded from the present analysis. The "failure" criteria for a sample or gene assay was set fairly low in order to ensure that these failures would not bias the subsequent data analysis and further increase the quality and confidence in the data used for analysis. A total of 192 single cell samples (41 normotensive samples and 151 hypertensive samples) and 81 different gene assays were included in the present analysis.

Raw C<sub>t</sub> values for individual samples were normalized against an average expression level between *Actb* and *Rpl19* to obtain - ΔC<sub>t</sub>. A -ΔC<sub>t</sub> value (Spurgeon et al. 2008) was used in order to relate this value to actual gene expression (e.g. a -ΔC<sub>t</sub> value of 10 in one cell has higher gene expression than a cell with a -ΔC<sub>t</sub> value of -2 in a particular gene). The following equations were used to calculate -ΔC<sub>t</sub> values for each gene:

$$-\Delta C_t^{gene} = average(C_t^{Actb}, C_t^{Rpl19}) - C_t^{gene} \quad (1)$$

*Actb* and *Rpl19*, included as part of a set of potential reference genes, were selected based on previously developed data normalization methods (Vandesompele et al. 2002; Andersen et al. 2004). These two genes proved to have the lowest stability measures (i.e. most stable behavior) across samples when analyzed by these established methods (Fig. S4). The  $-\Delta C_t$  values were used as a measure for relative gene expression and used as the basis for the analytical methods utilized in this report.

Due to the nature of the multiplex gene expression data obtained, several multivariate analytical techniques were utilized. Analysis initially focused on single cells from rats exposed to hypertension in order to identify transcriptional signatures that would distinguish neurons based on their respective input-type. The analysis was then expanded to include the set of single cells obtained from the normotensive baseline condition.

### **Principal Component Analysis (PCA)**

PCA is a mathematical technique that has a wide range of applications including analysis of high dimensional data sets produced by DNA microarrays and other high-throughput technologies. PCA is a technique that reduces the dimensionality of data while retaining most of the variation in the data set. The reduction of data is accomplished by identifying directions, or principal components, along which the variation in the data is maximal, with each subsequent principal component capturing the next largest amount of variation remaining in the data.

#### *Single cell clustering and contributing genes*

PCA was used as an unsupervised method to identify variables, specifically which genes from the initial set of 81 genes, which contributed to the variation, or separation of single cell populations along the principal components. PCA was performed on gene expression data for the hypertensive single cell samples. Multiple principal components were analyzed and genes were selected for further investigation based on their loading values for the principal components analyzed. This process resulted in a subset of 48 genes that was used to define and characterize the transcriptional behavior of the single cells described in the main text.

#### *Gene selection criteria*

In order to determine which genes had significant contributions to each principal component, genes were rank ordered based on their loading values, which were determined from PCA. The five highest and lowest ranked genes (10 genes total) from the first five principal components, which accounted for 49% of the variability in the data (based on the cumulative sum of their respective eigenvalues), were identified as genes of interest for subsequent analysis. Additionally, various subsets of the single cell data were analyzed based on gene functions (Table S3). These subsets were analyzed in order to identify any other genes contributing to the variability that may have been overshadowed by a few genes. In other words, these functional gene subsets were analyzed through PCA in order to identify less dominant sources of variability. Some of

the functional categorizations used to subset gene groups included ion channels, neuromodulatory regulators, and intracellular signaling. The full list of specific gene categorizations is listed in Table S3.

A rank ordered list of genes along the first five principal components and the respective gene functional subsets in which the single cell data was analyzed is tabulated in Table S4. The highlighted genes in Table S4 represent 30 of the final 48 genes selected that created the 48-gene dimensional data set on which further multivariate analysis was performed. The additional 18 genes were selected on the basis of their loading values from PCAs performed on the various subsets of data as described previously. As several genes were repeatedly identified as either a high or low ranking gene along multiple principal components (Fig. S5 and Table S4), a final set of 48 genes was selected.

### **Spearman Rank Correlation Coefficient, Dissimilarity Distance, and Multidimensional Scaling (MDS)**

Several statistical and visualization techniques were used to analyze single cell populations across the multiplex set of genes identified via PCA.

#### *Spearman Rank Correlation & Dissimilarity Distance*

Relative distances between single cells were determined using the spearman rank correlation coefficient, which in this case is a nonparametric measure of association between two single cells and is based on the rankings of the 48 genes used to define the transcriptional state of a single cell. The Spearman correlation coefficient is defined by the following equation:

$$\rho = \frac{\sum_i (x_i - \bar{x}_i)(y_i - \bar{y}_i)}{\sqrt{\sum_i (x_i - \bar{x}_i)^2 \sum_i (y_i - \bar{y}_i)^2}} \quad (2)$$

Where  $\rho$  is the Spearman rank correlation coefficient (ranging from -1 to 1) and  $x_i$  and  $y_i$  correspond to the rank order of the  $i^{th}$  gene of the expression level (i.e.  $-\Delta C_t$ ) in single cell  $x$  and single cell  $y$  respectively. Parameters  $\bar{x}_i$  and  $\bar{y}_i$  correspond to the mean of all rank values in single cell  $x$  and  $y$  respectively. This coefficient value is then used to determine the dissimilarity distance between two cells:

$$d = 1 - \rho \quad (3)$$

Dissimilarity distance  $d$  corresponds to the Spearman rank dissimilarity distance (ranging from 0 to 2) between two cells. A larger  $d$  value corresponds to two cells being more dissimilar to each other. The relative distances between all possible pairs of analyzed single cell samples was determined using the R statistical software (R Core Team 2013).

#### *Multidimensional Scaling (MDS)*

Non-metric MDS was performed in order to map the high-dimensional data set of dissimilarity values to a new set of “configuration” points  $x_i, \dots, x_n$  in a lower  $k$ -dimensional space such that the rank-order of the dissimilarity values between a pair of

single cells is well-approximated by the rank-order of distance values in the lower  $k$ -dimensional space. MDS is a technique that has been used extensively for classification in gene expression studies (Ross et al. 2003; Taguchi and Oono 2005; Fuller et al. 2002). Consequently the MDS technique maps these dissimilarity values into a lower dimensional space by interpreting the dissimilarity values as distances, which in this case equates to coordinate distances in a 3-D space. Therefore the Euclidean distance between each pair of spheres (i.e. single cells) represents the difference in their relative gene expression behavior. The closer the cells are in this projected space, the more similar they are in their transcriptional behavior. MDS aids in the visualization of the dissimilarity value between pairs of single cells and the distances between each mapped single cell approximates the calculated pair-wise dissimilarity calculated among the single cell samples. This mapping procedure occurs while minimizing the error between the actual distances in the original  $n$ -dimensional space and the lower dimensional space (i.e. minimizing the stress) (Van Deun and Delbeke 2000). This error, or stress ( $S$ ), is defined as:

$$S = \sqrt{\frac{\sum_{ij} (d_{ij} - d_{ij}^*)^2}{\sum_{ij} d_{ij}^{*2}}} \quad (4)$$

Where  $d_{ij}$  is the target distance in the original  $n$ -dimensional space and  $d_{ij}^*$  is the configuration distance in the lower  $k$ -dimensional space.

Configuration points were determined using the *isoMDS* function within the *MASS* package provided by R (R Core Team 2013).

### Single Cell Subtypes

As mentioned in the main text, input-type cell group definition focused on the extreme groups, cells with either *Th* expression or *Fos* expression. A rank ordering of the *Th* levels ( $-\Delta C_t$ ) showed a significant decrease in  $-\Delta C_t$  values within the lower 15% quantile. A similar approach was applied to *Fos* expression levels, however the lower 30% quantile showed a significant drop in expression levels within the subset of hypertensive samples. Thus single cells that fell within the lower 15% and 30% quantiles for *Th* and *Fos* expression ranges were deemed as *Th-/Fos+* and *Th+/Fos-* respectively (Fig. S8-11).

The remaining single cells were considered to have dual expression of *Th* and *Fos* and could be potentially be classified as either a catecholaminergic cell receiving higher-order inputs or a hypertension-response cell responding to baroreceptor inputs via interneurons. In order to address the multiple possible categorizations for these cells, a combinatorial approach was used for classification of these intermediate-expressing cells. The  $-\Delta C_t$  ranges for *Th* and *Fos* for these double positive cells were split into two groups respectively. A 30% quantile value of the *Th* expression range was used to define a threshold dividing  $Th^{high}$  and  $Th^{low}$  cells while the median expression of the intermediate range of *Fos* expression levels was used to determine  $Fos^{high}$  and  $Fos^{low}$  cells. Using this binary classification of expression levels, the remaining double positive

cells could be classified in one of 4 groups,  $Th^{low}/Fos^{low}$ ,  $Th^{low}/Fos^{high}$ ,  $Th^{high}/Fos^{low}$ , and  $Th^{high}/Fos^{high}$  as indicated in Fig. 5A in the main text and in Fig. S8A-S11A and Fig. S8B-11B.

#### *Testing $Th$ and $Fos$ quantile limits*

The quantile limits used to define the various input-type groups resulted in the extreme subtypes ( $Th+/Fos-$  and  $Th-/Fos+$ ) forming extreme clusters in MDS space (Fig. 4) with the intermediate input-type groups forming intermediate clusters in-between the extreme cluster of single cells. In order to test whether or not the organization of single cells is strictly dependent on the specific thresholds used, various threshold values were used to define the six input-type groups (Fig. S8-S11). Threshold ranging from a 5% quantile limit to a 25% quantile limit were used to redefine the subtypes (Fig. S8A/B, S9A/B, S10A/B and S11A/B). Using the new subtype classification, it is clear that regardless of the quantile limit used, cells classified in the extreme subtypes continue to cluster into extreme groups in the MDS space while the intermediate groups remain clustered in-between these extreme groups (Fig. S8D, S9D, S10D and S11D). The persistent placement of single cells at the extreme regions in the MDS space indicates that this multiplex gene gradient behavior across single cells is indeed strongly correlated to the strength and magnitude of the inputs received.

#### **Statistical Significance of Subtype Clusters and $Th$ and $Fos$ expression limits**

In order to determine the statistical significance of the extreme clusters, we determined the likelihood of similar extreme sub-type groups forming randomly from the existing data set. This probability was determined by performing the same statistical analysis (pairwise spearman rank correlation across single cells and MDS visualization of the dissimilarity data) on random permutations of the 48-gene “vectorized” data set of the single cells analyzed.

A random permutation of the data consisted of randomly shuffling the gene expression values ( $-\Delta C_t$ ) within a single cell sample. For example, the original  $Fos$  expression value would be randomly switched with the expression value of  $Atf2$ ,  $Th$  switched with  $Tac1$ , and so on and so forth. This random shuffling of gene expression data was performed on each single cell resulting in a single iteration of a random permutation of the data. Using this randomly shuffled data set, all possible pairwise comparisons between single cells were made to determine the Spearman rank correlation coefficient (2). This was then converted into a distance metric (3). This distance data matrix was then projected into a three dimensional space via multidimensional scaling (Fig. 4).

The same  $Th$  and  $Fos$  quantile limits were used to define the two extreme sub-types identified in our original analysis ( $Th+$  limit: 15% quantile,  $Fos+$  limit: 30% quantile). Thus the 15% quantile limit was defined by the randomized set of  $Th$  and  $Fos$  expression values. The dissimilarity values based on all possible pairwise-comparisons of the permuted data were projected into the 3D MDS space for visualization of the high dimensional distance data set. The input-type annotation was then applied to the projected data for the extreme  $Th+/Fos-$  and  $Th-/Fos+$  cell groups. We then characterized the two extreme cell groups using two typical statistical measures,



centroid distance and minimum distance, to define how these extreme cell groups were positioned relative to each other. In this case the centroid distance is defined as the distance between the central point (i.e., centroid) of the cluster of cells within a subtype (using cells falling within the 95% of the density distribution for the respective subtype). The minimum distance is simply the minimum distance between these two clusters. We repeated this permutation and cluster characterization process 1000 times with the existing data set.

We then posed the null hypothesis that the Euclidean distance (centroid or minimum distance) between the original extreme cell groups (within the MDS space) is no different than the distance measure obtained from the randomly shuffled data set. The alternative hypothesis indicates that these distance measures are greater than the distances from the shuffled data set. The 1000 iterations performed show that only one permutation of the data was able to achieve a centroid distance between the extreme cell subtypes equal to or greater than the centroid distance between the originally defined *Th+*/*Fos*<sup>-</sup> and *Th*<sup>-</sup>/*Fos*<sup>+</sup> cell groups (Fig. S7E). Moreover, none of the permutations were able to achieve a minimum distance greater than the minimum distance between the original groups. Thus the empirically defined p-value of the centroid and minimum distance between the *Th+*/*Fos*<sup>-</sup> and *Th*<sup>-</sup>/*Fos*<sup>+</sup> cell groups are 0.001 and 0 respectively allowing us to reject the null hypothesis. These values give no reason to suspect that these extreme subtypes or clusters are a result of random chance (Fig. S7E-F).

### **Gene Correlation Networks**

The gene expression heat maps of Fig. 4D and Fig. 5C indicate substantial correlation of gene expression across the various subsets of single cells. In Fig. 4D the heat map is divided into top and bottom rows for what appears as two distinct gene correlational clusters, which we have termed “modules”. We used a Spearman rank correlation coefficient approach to produce a quantitative representation of these pair-wise comparisons of gene-gene correlations and the two modules across the various subsets of single cells. These results were visualized in Fig. 4C. Then the correlational results were visualized as network structures – as described below.

#### *Spearman rank correlation coefficient*

The  $-\Delta C_t$  values for the set of 192 single cell samples (151 hypertensive and 41 control single cells) and subset of the 48 genes identified by PCA were used to determine possible correlative relationships between genes across single cell samples. Individual reactions that failed were interpreted to represent either too low or no measurable amount of cDNA in the amplified sample. Therefore a “minimum-1” value was substituted for that particular sample-gene qRT-PCR reaction (the minimum value being the lowest  $-\Delta C_t$  value across all samples for a particular gene) (Bergkvist et al. 2010). The Spearman correlation coefficient shared between two genes was calculated using equation (2). In this case  $x_i$  and  $y_i$  corresponds to the rank order of gene  $x$  and gene  $y$  for the  $i^{th}$  single cell sample. Therefore two genes having a high p value indicate that the two genes that have similar rank ordering across the set of single cells analyzed. Spearman rank correlation coefficients were calculated for all possible pair-wise

comparisons of the 48 genes identified from PCA across single cells within each of the input-type sub-types identified. Only gene-to-gene correlation coefficients  $\geq 0.4$  were used to define whether or not two genes shared a correlative relationship and were included in the correlational network diagram.

The target genes are separated into transcription modules identified by their Spearman rank correlation across single cells (Fig. 4C). This structure allows for an easier visualization and interpretation of how the pairwise functional relationships change under physiological perturbations (baseline normotensive group and hypertensive sub-groups).

#### *Gene network diagram structure*

The connectional relationships among genes were represented as connections between members of three circles, in a tri-circular manner. The objects in the top circle in each panel are transcription factors (TFs) and the bottom circles represent the genes of each gene expression module (Fig. 6).

The correlative network structures represent correlative relationships shared between TFs and target genes of each module across the three cell types: baseline *Th*, hypertension *Th*, hypertension *Fos*. This structure and the three constituent parts provide an efficient way to visualize differences in correlative relationships and connectivity across the modules and cell types.

In this context, we note that the number of correlational relationships between TFs and target genes from module 1 and module 2, is much higher in the baseline group of cells (obtained from normotensive rats), and decreases in the hypertensive group of cells (obtained from hypertensive rats) shown (Fig. 6). The *Th* hypertension cells share network properties that are intermediate, with commonalities with both the other cell types, which are most different from one another. Additionally, the number of correlations between genes of module 1 and module 2 decreases in the perturbed (hypertensive) groups of cells.

#### **Contour Plots and Dynamic Landscape**

The contour plots and 2-dimensional figures are used to help illustrate the concepts of distinct cell states and the influence inputs have in determining these states. The contour plots are a projection of the single cells in the 3D MDS space onto a 2D plane (Fig. 7A and 7B). This perspective provides a further reduction of the high-dimensional dissimilarity data set. Moreover, the contour plots provide a simplified perspective on how the various input-type groups are positioned relative to one another. The placement of the *Th*<sup>+</sup>/*Fos*<sup>-</sup> and *Th*<sup>-</sup>/*Fos*<sup>+</sup> groups are clearly positioned at the extremes of the entire region, or landscape, while the intermediate groups occupy the intermediate region in-between the two extreme groups. This schematic also illustrates the idea of how a single cell may transition between respective cell states and the likelihood of such a transition occurring. Cell states that share a high degree of overlap, as is the case with the *Th*<sup>+</sup>/*Fos*<sup>-</sup> and *Th*<sup>high</sup>/*Fos*<sup>low</sup> are more likely to have single cells transition between these states as opposed to distinct states that are much farther apart. The various

colored contours represent the 65<sup>th</sup>, 95<sup>th</sup>, and 99<sup>th</sup> percentile of the single cells for any given input-type group. Outliers, defined as cells falling outside of the 95<sup>th</sup> percentile of all single cells classified within a subtype, were not included in defining the 65<sup>th</sup>, 95<sup>th</sup>, 99<sup>th</sup> percentile. The majority of cells lie within the inner most contour region in this topology (65<sup>th</sup> percentile) (Fig. 7A and 7B).

To further emphasize the dominant transcriptional states and how these states relate to one another, a landscape topography was created. The landscape topography is based on an inversion of the probability densities of single cells. When there is a greater concentration of cells in a particular region, such as those found in the 65<sup>th</sup> percentile of a particular input-type group, the probability density is much higher and decreases as one moves away from these regions of high single cell concentration. A topographical plot based on the probability densities was then inverted in order to create regions of lower values or valleys in this landscape to highlight the stability associated with these dominant transcriptional or potential “attractor”-like states. As a single cell moves away from the inner most contour or deep well, it is transitioning away from the well and climbing up towards a less stable state, which is less occupied by the single cells. Depending on the inputs received, single cells may occupy these various stable valleys and intermediate levels within these valleys.

Contour plots and landscape topography figures were based on the projected point values in the 3D MDS space (Fig. 7A and 7B). The plotrix, gplots, and graphics packages that were used to generate the figures are in the R statistical software (R Core Team 2013).

### **Cross-Contamination Analysis of LCM Single Cell Samples**

In order to investigate the likelihood of adjacent cell contamination in LCM single cell samples, gene expression levels were measured from a separate set of single neuron and astrocyte samples collected from the NTS of a naïve rat. Due to the high density of astrocytes and their close proximity to neurons, this cell-type and associated genes were selected to test for possible cross-contamination in single neuron samples. Single cell samples were obtained using the following methods:

#### *Tissue Sections*

Coronal 10µm sections from the naïve rat were obtained using the same procedures outlined in the “NTS Tissue Sections” text.

#### *Cell-Type Specific Immunohistochemistry Staining*

Following the accelerated protocol outlined in the “Immunohistochemistry Staining” section, brain tissue sections were incubated with the primary antibody anti-Tyrosine Hydroxylase (TH) 1/25 (Pel-Freez® Biologicals) or anti-Glial Fibrillary Acidic Protein (GFAP) (Invitrogen™). Due to availability issues, TH-tissue sections were incubated with the secondary antibody Cy3 anti-rabbit (Jackson ImmunoResearch Laboratories, Inc.) instead of Alexa-488 anti-rabbit. GFAP-tissue sections were incubated with the secondary antibody Alexa-488 anti-mouse (Jackson ImmunoResearch Laboratories, Inc.).

### *Single Neuron and Astrocyte LCM Sampling*

The same procedures and settings outlined in the “Laser Capture Microdissection (LCM)” were used to obtain single neuron and single astrocyte samples. Cells with positive staining (TH+, GFAP+) were lifted individually on caps. Pre- and post-laser-microdissection inspections of the tissue slice and cap were performed for each single cell collected to ensure that no gross contamination was present in a sample. Once each cell was screened for quality as a whole cell on the cap after capture, lysis buffer was dropped onto the single cell on the cap (5.5µl; Life Technologies, Grand Island, NY) and cooled on ice before storage at -80°C.

### *Single Neuron and Astrocyte qRT-PCR*

Intron-spanning PCR primers for genes enriched in astrocyte, microglial, and endothelial cells were designed using QuantPrime ([www.quantprime.de](http://www.quantprime.de)) and PrimerBLAST ([www.ncbi.nlm.nih.gov/tools/primer-blast](http://www.ncbi.nlm.nih.gov/tools/primer-blast)). The same reverse-transcription and pre-amplification procedures outlined in the “High-throughput quantitative PCR” section were used for the single neuron and astrocyte sample set. Eva Green® dye was used for DNA binding during the PCR cycle due to its high binding sensitivity, which would minimize the chance of false negatives (e.g. GFAP non-expression in a neuron sample) as a result of technical issues. Runs were 40 cycles (15s at 95°C, 5s at 70°C, 60s at 60°C). C<sub>t</sub> values were calculated by the Real-Time PCR Analysis Software (Fluidigm).

### *Data Normalization for Neuron and Astrocyte LCM samples*

Raw C<sub>t</sub> values for individual samples within a particular assay were normalized against the median expression level across all neuron sample replicate 2 raw C<sub>t</sub> values within the respective assay. The following equations were used to calculate -ΔC<sub>t</sub> values for each gene:

$$-\Delta C_t^{gene} = \text{median}(C_{t, i-\text{rep}2}^{gene}) - C_t^{gene} \quad (5)$$

where  $i$  is the  $i^{\text{th}}$  single neuron sample from replicate set 2 ( $\text{rep}2$ ).

## Supplemental Table and Figure Legends

**Table S1. Raw Ct data of quality controlled single cell samples.**

**Table S2. Normalized  $-\Delta C_t$  data of quality-controlled single cell samples.**

**Table S3. Specific gene categorizations, related primer sequences, and gene entrez ID.**

**Table S4. Selection of genes contributing to variability.** Genes are rank ordered based on their loading values along the first principal component. The highlighted loading values indicate genes that were selected based on their high or low loading values along each respective principal component.

**Fig. S1. High-throughput qPCR reproducibility.** A serial dilution sample set of mRNA extracted from tissue punches from the nucleus tractus solitarius (NTS) of a Sprague Dawley rat was assayed on each 96.96 BioMark<sup>TM</sup> dynamic array. A pairwise comparison among all dynamic arrays shows that the measured  $C_t$  values for the serial dilution sample sets fall along the 45 degree line (red dashed line) with minimal deviation. The slope and  $R^2$  values are nearly 1 for all graphs indicating that the arrays are capable of measuring gene expression values, over 5 orders of magnitude, consistently with minimal technical variability.

**Fig. S2. High-throughput qPCR analysis of LCM collected single neurons and astrocytes. (A)** Heat map representing gene expression levels of single neuron and astrocyte samples obtained via BioMark<sup>TM</sup> (Fluidigm©; reference Materials and Methods High-throughput qPCR for additional details). Raw  $C_t$  values are visualized in the heat map. Ten single neuron and eight single astrocyte samples were collected and measured. Two sets of technical replicates across samples and four technical replicates across each assay were measured. Assays measuring the expression of housekeeping genes (*Gapdh*, *Rpl19*) and cell-type enriched genes were used. Cell-type enriched assays include an astrocyte-enriched gene (*Gfap*), neuron-enriched genes (*Cacna1d*, *Th*), microglia-enriched gene (*Itgam*), and endothelial-enriched genes (*Lamb3*, *Pecam1*). Rat whole brain RNA extract was included as a positive control while DNA suspension buffer was included as a negative control. Expression of housekeeping genes occurs in both types of single cells (neurons and astrocytes) as expected. *Gfap* expression is present in all astrocyte samples while it is either low or non-existent in single neuron samples, which suggests minimal cross-contamination of astrocytes in neuron samples. Expression of *Cacna1d* and *Th* is present in all neuron samples while it is non-existent in single astrocyte samples indicating no cross-contamination of neurons in astrocyte samples. Additionally, expression of microglia and endothelial-enriched genes is non-existent in either neuron or astrocyte samples, which indicates no cross-contamination of microglial or endothelial cell-types in either neuron or astrocyte samples collected by LCM. **(B)** A plot of sample (technical) replicate 1 versus sample (technical) replicate 2 shows the highly-reproducible nature of the high-throughput qPCR BioMark<sup>TM</sup> platform and demonstrates the low technical variability

affecting gene expression measures of single cell samples. **(C)** Representative qPCR amplification curves from the same single cell samples used in the gel-electrophoresis run (ref Fig. S2C). **(D)** Heat map representing median centered  $-\Delta C_t$  values. Raw  $C_t$  values were subtracted from the corresponding median  $C_t$  value of neuron replicate sample set 2 within each assay. Neuron samples show higher normalized expression of *Cacna1d* and *Th* (neuron-enriched assays) than astrocyte samples and minimal to no normalized expression of *Gfap* (astrocyte-enriched assay).

**Fig. S3. Assay technical replicates.** All possible pairwise comparisons of assay technical replicates measured for single neuron and astrocyte LCM samples (Fig 2). All possible pairwise combinations show minimal technical variability which further supports the highly reproducible nature of the high-throughput qPCR measurements obtained from the single cell samples.

**Fig. S4. Reference gene stability.** **(A)** Stability measures of the four potential housekeeping genes as determined by the geNorm method developed by Vandesompele et al., (2002). The variability measure indicates a gene that has lower gene expression variation across the samples and conditions measured. **(B)** Variability of the four potential housekeeping genes as determined by the NormFinder method developed by Andersen et al., (2004). Similarly a lower variability value indicates more stable gene expression behavior across samples and conditions measured. In both cases, *Actb* and *Rpl19* exhibited the most stable behavior.

**Fig. S5. Contribution of genes to variability.** Ranked loading values for all 81 genes analyzed across multiple principal components (PCs). **(A)** PC 3, **(B)** PC 4, and **(C)** PC 5 are included. Different genes have greater (or lower) contributions to the variation in data along each principal component.

**Fig. S6. Multiple angles of 3D MDS visualization.** Various angles are included to provide additional perspective on how single cells of **(A,C,E)** extreme groups and **(B,D,F)** intermediate groups are projected into the 3D MDS space (based on their similarity in rank ordered gene expression). Cells not included in the extreme *Th*<sup>+</sup>/*Fos*<sup>-</sup> and *Th*<sup>-</sup>/*Fos*<sup>+</sup> groups are represented by smaller more transparent grey spheres in **(A)**. Conversely, cells not included in the intermediate groups (*Th*<sup>high</sup>/*Fos*<sup>low</sup>, *Th*<sup>high</sup>/*Fos*<sup>high</sup>, *Th*<sup>low</sup>/*Fos*<sup>low</sup>, *Th*<sup>low</sup>/*Fos*<sup>high</sup>) are represented as smaller more transparent spheres in **(B)**.

**Fig. S7. Statistical significance of *Th*<sup>+</sup>/*Fos*<sup>-</sup> and *Th*<sup>-</sup>/*Fos*<sup>+</sup> thresholds.** Normalized gene expression data was permuted over 1000 iterations to determine the possibility of similar extreme groups forming randomly. The centroid distance and minimum distance between the extreme subtypes were used to characterize their relative positioning. The centroid distance is the distance between central points of each group in the 3D MDS space while minimum distance is the distance between the two closest points between the two groups. **(A)** *Intergroup distance (centroids)*. The minimum distance (green dashed line segment) between the two extreme subtypes from the original data set. **(B)** *Intergroup distance (closest points)*. The minimum distance (green dashed line segment) between the two extreme subtypes from the original data set. **(C)** *Intergroup*

distance of permuted data (centroids). A representative example of a permuted data set and the resulting *Th*+/*Fos*- (orange spheres) and *Th*-/*Fos*+ (blue spheres) groups. The green dashed line represents the centroid distance while the green dashed line in (D) *Inter-group distance of permuted data (closest points)*. The minimum distance between clusters generated from the permuted data set. (E) Distribution of the centroid distances calculated from the 1000 iterations performed. Only 1 random permutation achieved the formation of two extreme groups having a centroid distance equal to or greater than the distance found in the original data, shown by the red dashed line ( $p=.001$ ). (F) Distribution of the minimum distances calculated from a permutation step. None of the iterations produced a minimum distance as large as the distance found in the original data set, shown by the red dashed line ( $p=0.000$ ). Refer to *Statistical Significance of Subtype Clusters and Th and Fos expression limits* section of Supplementary Information for additional detail.

**Fig. S8. Varying *Th*+/*Fos*- and *Th*-/*Fos*+ thresholds (5% quantile limits).** Specified quantile values were used to define the limits used to categorize single cells within the subtypes. Single cell projections in the MDS space were examined under various quantile limits used to categorize single cells in the two extreme subtypes. (A) 5% quantile limit for *Th*+ expression is represented by the blue dashed line. Cells below the blue dashed line are categorized as *Th*-/*Fos*+ cells. Single cells above the blue dashed line are categorized as either *Th*<sup>high</sup> or *Th*<sup>low</sup> cells. The green dashed line represents the 30% quantile limit used to determine which cells are *Th*<sup>high</sup> (above green line) or *Th*<sup>low</sup> (below green line). (B) 5% quantile limit for *Fos*+ expression is represented by the orange dashed line. Single cells below the orange line are categorized as *Th*+/*Fos*- cells. The green dashed line represents the median expression value of the remaining single cells and is used to determine which remaining single cells are *Fos*<sup>high</sup> or *Fos*<sup>low</sup>. (C) The resulting bivariate plot showing the scatter of single cells and what cells are categorized in the two extreme subtypes. (D) The resulting 3D MDS visualization of single cell correlations (or dissimilarity) based on rank ordered gene expression. Note how the newly defined single cells continue to be projected at opposite extremes of the MDS space. (E) The corresponding rearranged heat map representing the scaled gene expression data. Rows represent genes while columns represent single cells. Single cells within each subtype are rank ordered by their respective *Th* or *Fos* expression level.

**Fig. S9. Varying *Th*+/*Fos*- and *Th*-/*Fos*+ thresholds (10% quantile limits).** Stepwise process of defining expression limits for *Th* and *Fos* and how the resulting cells are projected into the 3D MDS space based on their similarity (or dissimilarity) in rank ordered gene expression of the 48 genes identified from PCA. Annotation is identical to Fig. S8.

**Fig. S10. Varying *Th*+/*Fos*- and *Th*-/*Fos*+ thresholds (15% quantile limits).** Stepwise process of defining expression limits for *Th* and *Fos* and how the resulting cells are projected into the 3D MDS space based on their similarity (or dissimilarity) in rank ordered gene expression of the 48 genes identified from PCA. Annotation is identical to Fig. S8.

**Fig. S11. Varying *Th*+/*Fos*- and *Th*-/*Fos*+ thresholds (15% and 25% quantile limits).** Stepwise process of defining expression limits for *Th* and *Fos* and how the resulting cells are projected into the 3D MDS space based on their similarity (or dissimilarity) in rank ordered gene expression of the 48 genes identified from PCA. A 15% quantile value is used to define *Th*+ cells while a 25% quantile value is used to define *Fos*+ cells. Annotation is identical to Fig. S8.

**Fig. S12. Gene-to-gene spearman rank correlations.** Spearman rank correlation coefficients were calculated for pairwise comparisons of the subset of 48 genes across single cells having expression of both *Th* and *Fos* (i.e., cells in the intermediate groups). The spearman correlation coefficients (ranging from -1 to 1) between all pairs are shown in the heat map. Genes within transcription module 1 have a slightly higher correlation coefficient with each other than with those in module 2 and vice versa. However, the overall values of the spearman correlation coefficients are lower than those calculated between genes across single cells of the extreme subtypes (*Th*+/*Fos*- and *Th*-/*Fos*+ groups).

**Fig. S13. Constrained transcriptional behavior of hypertensive cells.** A projection of the similarity values of single cells (based on rank ordered gene expression of the 48 genes identified in PCA). Normotensive *Th*+ single cells (green spheres) are included along with hypertensive *Th*+/*Fos*- single cells (orange spheres) and *Th*-/*Fos*+ single cells (blue spheres). The ellipsoids represent the 65<sup>th</sup> percentile of the single cell density for each subtype. Outliers within each subtype (single cells outside of the 95<sup>th</sup> percentile density for each subtype) were not included when defining these ellipsoids. In the case of the normotensive ellipsoids, two ellipsoids were included to represent the space occupied the normotensive single cells. The hypertensive *Th*+/*Fos*- cells occupy a smaller constrained space than their normotensive counterparts.

**Fig. S14. Subtype clusters maintained across animal subjects.** Single cells in the 3D MDS space are annotated with the respective animal subjects from which they were taken from. Ellipsoids were added to represent the input-type defined subtypes originally identified (orange: *Th*+/*Fos*-, red: *Th*<sup>high</sup>/*Fos*<sup>low</sup>, yellow: *Th*<sup>high</sup>/*Fos*<sup>high</sup>, cyan: *Th*<sup>low</sup>/*Fos*<sup>low</sup>, grey: *Th*<sup>low</sup>/*Fos*<sup>high</sup>, blue: *Th*-/*Fos*+). The ellipsoids represent the 65<sup>th</sup> percentile of the single cell density for each subtype. Outliers within each group (single cells outside of the 95<sup>th</sup> percentile population density for each subtype) were not included when defining these ellipsoids. Single cells from their respective animal subjects are scattered throughout all subtypes and are not concentrated to one particular ellipsoid indicating that these clusters are *not* an artifact of animal variability.



## Supplemental References

- Andersen CL, Jensen JL, Ørntoft TF. 2004. Normalization of real-time quantitative reverse transcription-PCR data: a model-based variance estimation approach to identify genes suited for normalization, applied to bladder and colon cancer data sets. *Cancer Res* **64**: 5245–50.
- Bergkvist A, Rusnakova V, Sindelka R, Garda JMA, Sjögreen B, Lindh D, Forootan A, Kubista M. 2010. Gene expression profiling--Clusters of possibilities. *Methods* **50**: 323–35.
- Van Deun K, Delbeke L. 2000. Multidimensional Scaling. <http://www.mathpsyc.uni-bonn.de/doc/delbeke/delbeke.htm>.
- Fuller GN, Hess KR, Rhee CH, Yung WKA, Sawaya R a, Bruner JM, Zhang W. 2002. Molecular classification of human diffuse gliomas by multidimensional scaling analysis of gene expression profiles parallels morphology-based classification, correlates with survival, and reveals clinically-relevant novel glioma subsets. *Brain Pathol* **12**: 108–16.
- R Core Team. 2013. R: A Language and Environment for Statistical Computing. <http://www.r-project.org/>.
- Ross ME, Zhou X, Song G, Shurtleff S a, Girtman K, Williams WK, Liu H-C, Mahfouz R, Raimondi SC, Lenny N, et al. 2003. Classification of pediatric acute lymphoblastic leukemia by gene expression profiling. *Blood* **102**: 2951–9.
- Spurgeon SL, Jones RC, Ramakrishnan R. 2008. High throughput gene expression measurement with real time PCR in a microfluidic dynamic array. *PLoS One* **3**: e1662.
- Taguchi Y-H, Oono Y. 2005. Relational patterns of gene expression via non-metric multidimensional scaling analysis. *Bioinformatics* **21**: 730–40.
- Vandesompele J, De Preter K, Pattyn F, Poppe B, Van Roy N, De Paepe A, Speleman F. 2002. Accurate normalization of real-time quantitative RT-PCR data by geometric averaging of multiple internal control genes. *Genome Biol* **3**: RESEARCH0034.

**Table S3. Specific gene categorizations, related primer sequences, and gene entrez ID.**

| Entrez ID | Gene    | Primer Design Forward    | Primer Design Reverse    | UPL# | Gene Functional Categorization        |
|-----------|---------|--------------------------|--------------------------|------|---------------------------------------|
| 24310     | Ace     | GACAACTATCCAGAGGGAATTGA  | CACAACACCTTGGCTGTCC      | 25   | Angiotensin System                    |
| 81822     | Actb    | CTGGCTCTAGCACCATGA       | TAGAGCCACCAATCCACACA     | 63   | housekeeping                          |
| 25238     | Adrbk1  | AAGAAGATCCTGCTGCCAGA     | CCGGAAGAGCAGGTATCCTA     | 89   | Signaling feedback                    |
| 24179     | Agt     | CACCTACGTTCACTTCCAAGG    | AGAACTCATGGAGCCAGTC      | 7    | Angiotensin System                    |
| 24180     | Agtr1a  | GGCTAGCCAAAGGAAGAGTCA    | CTGCCAGCGAACTGTTTTC      | 42   | Angiotensin System                    |
| 24182     | Agtr2   | GAACAGAATTACCCGTGACCA    | ATGAATGCCAACACAACAGC     | 121  | Angiotensin System                    |
| 298646    | Agtrap  | CCATCTTCAGCTTGCTGCT      | CCTGAGAAGGTCCGAAGAAA     | 2    | Angiotensin System                    |
| 24185     | Akt1    | AACGACGTAGCCATTGTGAA     | CCATCATTCTTGAGGAGAAAGT   | 71   | Intracellular Signaling               |
| 64363     | Araf    | GAAGACAAGCCCAAGATGGA     | GACTGGGCAGGTGCCATA       | 77   | Intracellular Signaling               |
| 25387     | Arrb1   | GGGAGACCTTGTCATCCAGT     | GGAGTCTCGTCTCTGGAAC      | 76   | Signaling feedback                    |
| 25388     | Arrb2   | GATCCTGTCGATGGTGTGGT     | GGAAAGACAGGCCAGTACA      | 98   | Signaling feedback                    |
| 81647     | Atf2    | CTGGTGGCTGAAAGGAACAT     | TCCCAAGTTGCCATCTAGTGT    | 85   | transcriptional regulators            |
| 29716     | Cacna1d | GGCAGAAGACATAGATCCTGAGA  | ACTGGTGGGCATGCTAGTGT     | 55   | Ion Channel                           |
| 24241     | Calca   | CAGATGAAAGTCAGGGAGCTG    | CAGGATCTCTTCTGGGCAGT     | 63   | neuromodulatory regulator             |
| 314322    | Fos     | CAGCCTTTCCTACTACCATTCC   | ACAGATCTGCGCAAAAGTCC     | 67   | transcriptional regulators            |
| 81646     | Creb1   | CTAGTGCCAGCAACCAAGT      | GGAGGACGCCATAACAACCTC    | 9    | transcriptional regulators            |
| 81648     | Crh     | CAACCTCAGCCGATTCTGAT     | GCGGGACTTCTGTTGAGGT      | 69   | neuromodulatory regulator             |
| 25699     | Dbh     | ACTACTGTCGCCACGTGCT      | ACCGGCTTCTTCTGGGTAGT     | 81   | neuromodulatory regulator             |
| 116663    | Dusp6   | TCTCTGATCACTGGAGCCAAA    | GTTTTTGCCTCGGGCTTC       | 123  | Intracellular Signaling               |
| 24330     | Egr1    | CGAACAACCTACGAGCAC       | GCGCCTTCTCGTTATTCAGA     | 114  | transcriptional regulators            |
| 114090    | Egr2    | CTACCCGGTGGAAGACCTC      | TCAATGTTGATCATGCCATCTC   | 60   | transcriptional regulators            |
| 25148     | Egr3    | CAATCTGTACCCCGAGGAGA     | CCGATGTCCATCATTCTCT      | 7    | transcriptional regulators            |
| 314436    | Elk1    | CACCAGTCCAAACCCCTTAG     | TCAACTCTTCAGATTTCTGGTTTG | 16   | transcriptional regulators            |
| 25445     | Fosl1   | GCAGAAACCGAAGAAAGGAA     | TCCTCCAACCTGTCGGTCTC     | 4    | transcriptional regulators            |
| 29705     | Gabra1  | CGATCCTCTCTCCCACTT       | TCTTCATCAGGGGCTTGTC      | 50   | neuromodulatory targets - Ion Channel |
| 289606    | Gabra2  | GGTTTCCGCTGCTTGTCT       | TTCTTGGATGTTAGCCAGCAC    | 20   | neuromodulatory targets - Ion Channel |
| 140675    | Gabra4  | GTACCTGCGATCGTGCTGT      | CTGTCCTGGGATTCGTTTA      | 98   | neuromodulatory targets - Ion Channel |
| 24922     | Gabrb3  | TCATGGGTGTCCTTCTGGAT     | ATGGTGAGCACGGTGGTAAT     | 84   | neuromodulatory targets - Ion Channel |
| 65187     | Gabrq   | GCGGAGAATCGTGATTTCAA     | GCTGCTGTTGTGGAAGTCG      | 123  | neuromodulatory targets - Ion Channel |
| 24379     | Gad1    | TACAACCTTTGGCTGCATGT     | TGAGTTTGTGGCGATGCTT      | 77   | neuromodulatory regulator             |
| 29141     | Gal     | TGGAGTTTCTAGTTTCTGCAC    | GGTGTGGTCTCAGGACTGCT     | 10   | neuromodulatory regulator             |
| 29627     | Gria2   | GCCAAGGACTCGGGAAGTA      | CCCCGACAAGGATGTAGA       | 67   | neuromodulatory targets - Ion Channel |
| 29628     | Gria3   | TTCAACAAAAGAATTTTTCAGACG | CCGTGAGCTGTTGTTTTGG      | 21   | neuromodulatory targets - Ion Channel |
| 24409     | Grin2a  | CGTCATGGTCTCCAGGAGTAA    | GAGGCACTGAAGGGTTCG       | 94   | neuromodulatory targets - Ion Channel |
| 24408     | Grin1   | GCTTTTGACGCGGTGAAC       | GGGCTCTGCTCTACCACTCTT    | 69   | neuromodulatory targets - Ion Channel |
| 24410     | Grin2b  | TCCTGCAGCTGTTTGGAGAT     | GCTGCTCATCACCTATTCTT     | 106  | neuromodulatory targets - Ion Channel |
| 24411     | Grin2c  | GGCACTCTGCAACTTCTG       | GTTCTGGCAGATCCCTGAGA     | 78   | neuromodulatory targets - Ion Channel |

**Table S3. Specific gene categorizations, related primer sequences, and gene entrez ID.**

| Entrez ID | Gene    | Primer Design<br>Forward   | Primer Design<br>Reverse  | UPL# | Gene Functional<br>Categorization     |
|-----------|---------|----------------------------|---------------------------|------|---------------------------------------|
| 24412     | Grin2d  | GCCCTGCTGCGAGACTAT         | CGGTATCCAGGTGATGTT        | 67   | neuromodulatory targets - Ion Channel |
| 59075     | Grk5    | CCACCAAAGAAAGGGCTGT        | TCTTGAATTGTTTGTATGCTG     | 124  | Signaling feedback                    |
| 59076     | Grk6    | ATGTCTTTGGGCTGGATGG        | CAGTTCACAGCAATCCTT        | 85   | Signaling feedback                    |
| 114244    | Hcn2    | CACCCCTACAGCGACTTCAG       | TTTCCACCATGAACAACAG       | 95   | neuromodulatory targets - Ion Channel |
| 24465     | Hprt1   | GACCGTTTCTGTCATGTCG        | ACCTGGTTCATCATCTAATCAC    | 95   | housekeeping                          |
| 293621    | Hras    | TCACAGTAAATTATTGATGGTCTTGA | CCACAGGCACTACACCTCCT      | 20   | Intracellular Signaling               |
| 25262     | Itpr1   | CATCACAGCCCTCATCCTTAAC     | GGAGTAGCTTTGAAGCATTGTTCT  | 60   | Intracellular Signaling               |
| 25679     | Itpr3   | GTGATGGAGACCAAGCTGAAG      | TAGTCTAGGCGCACGTTGAG      | 80   | Intracellular Signaling               |
| 24516     | Jun     | TTCTGACCAACTGCCTGGAT       | GAAGGGACTCTCCAAGTGCTC     | 17   | transcriptional regulators            |
| 24517     | Junb    | GGGAGCTGAGAGAAGAGACG       | TGGTAGCTGTGCGTAAAAGC      | 50   | transcriptional regulators            |
| 24518     | jund    | CAAGCTGGAGCGTATCTCG        | CGGTGTTCTGGCTTTTGAG       | 25   | transcriptional regulators            |
| 29712     | Kcnj2   | GCTGCCTTCTCTTCTCCAT        | TCGGGCACTCGTCTGTAAAC      | 115  | neuromodulatory targets - Ion Channel |
| 170851    | Map2k1  | GGCCTGGTTATGGCTAGGA        | GATGATCTGGTTCGGATTG       | 80   | Intracellular Signaling               |
| 287398    | Map2k4  | AACAAATGGTCCACAACCA        | TTTTTCATCCACAAGTTGATCGT   | 118  | Intracellular Signaling               |
| 363855    | Map2k7  | TCAGGGGACTTCCAGTCATT       | GATGAAGCTGTGTTCAAGTAGTTTG | 114  | Intracellular Signaling               |
| 309168    | Map3k11 | CGGGAAGAGACACGTGGA         | CCAGGAGCAGAGCGTGATA       | 22   | Intracellular Signaling               |
| 25579     | Map3k12 | CCTCTCACCTCCATTCTGA        | AGCCAGGTGTGCTGAGTAGC      | 3    | Intracellular Signaling               |
| 116596    | Map3k8  | ACCTCCGGGGAACAGAGA         | GCCTGTCTGCATGTGAATGA      | 125  | Intracellular Signaling               |
| 116590    | Mapk1   | TGAAGTTGAACAGGCTCTGG       | TGAATGGTGCTTCAGCAATG      | 1    | Intracellular Signaling               |
| 50689     | Mapk3   | GGAGGTGGAGGTGGTGAA         | GCACGTGGTCATATGCTGAG      | 46   | Intracellular Signaling               |
| 114509    | Mapk7   | ACCCAGCAACTGTCCAAGTC       | GGTCAAAGCCAACACCGTAG      | 16   | Intracellular Signaling               |
| 116554    | Mapk8   | GCAGCCGTCTCCTTTAGGT        | CATTGACAGACGGCGAAGA       | 89   | Intracellular Signaling               |
| 24604     | Npy     | ATCCCTGCTCGTGTGTTTG        | CTGGCCATGCTCTGCT          | 129  | neuromodulatory regulator             |
| 29358     | Npy1r   | CTGCAACCACAATCTGCTGT       | TGACGCAGGTGGAGATCAT       | 53   | neuromodulatory regulator             |
| 29431     | Pak1    | TCGAGAAGATTGGACAAGGTG      | GCCCTGTGGCTACATCCAT       | 98   | Intracellular Signaling               |
| 81745     | Pdpk1   | AAAACCTTCTTCGTCCACACG      | GGACTGCTCTGGTACTGTTGC     | 79   | Intracellular Signaling               |
| 29542     | Pebp1   | CGGACCTCCCAAAGACAC         | AGAGGCTGCTCTGCTCATA       | 20   | Intracellular Signaling               |
| 364152    | Phox2b  | GAGAGTCCAGGTGTGTTCC        | GGCTTCTTGTCTCTGTCAT       | 70   | transcriptional regulators            |
| 60664     | Pik3r3  | ATCCCAAACCTTGATGTGAAGC     | TTATCTTCTTTACCAACTGATCCTG | 130  | Intracellular Signaling               |
| 24680     | Prkca   | TACGCGTGCTCCTGTATG         | CTTGGCAGGGTGTGTTGGT       | 44   | Intracellular Signaling               |
| 24654     | Plcb1   | CGCCAAAAGGATAGCAAGA        | GCGGATGAGCCATGATCT        | 3    | Intracellular Signaling               |
| 29322     | Plcb3   | CTTCACACAATACCTATCTCACTGC  | CGGTACATCTCCACTGACGA      | 20   | Intracellular Signaling               |
| 25594     | Ppp1cb  | TGAACGTGGACAGCCTCAT        | ACAATTTTCCCAGACGAC        | 67   | Intracellular Signaling               |
| 24669     | Ppp1cc  | GGCGGATATCGATAAACTCAA      | TGGCTTGGACCTCTCACT        | 66   | Intracellular Signaling               |
| 117281    | Ppp2r1a | GCTACATGGTGGCAGACAAA       | TAGTGATCTCAGGCCCACTG      | 50   | Intracellular Signaling               |
| 65179     | Ppp5c   | CCGAAGGCACTCTGAAGC         | TGATAGCGTTCTCGTAGTCTTG    | 82   | Intracellular Signaling               |
| 29340     | Prkce   | TCTACCTGTCTGGCTTAGCA       | CGGGTCTTGGTCATGAAAG       | 89   | Intracellular Signaling               |
| 50646     | Ptk2b   | CAATCTGTGGCTCCTAAGC        | TAGGAGAGCTGGCACACAGA      | 85   | Intracellular Signaling               |
| 24697     | Ptpn1   | GGAACAGGTACCGAGATGTCA      | AGTCATTATCTTCTGATGCAATTT  | 114  | Intracellular Signaling               |
| 117063    | Ptpn2   | AGGCTACAACCGCTCAGAAG       | CATTTAGGTGTCTGTCAATCTTGG  | 84   | Intracellular Signaling               |
| 24703     | Raf1    | TTTCTTGCCGAATAAGCAAAG      | CAGTCGTGAAGCTCATCC        | 114  | Intracellular Signaling               |

**Table S3. Specific gene categorizations, related primer sequences, and gene entrez ID.**

| Entrez ID | Gene     | Primer Design<br>Forward | Primer Design<br>Reverse        | UPL# | Gene Functional<br>Categorization        |
|-----------|----------|--------------------------|---------------------------------|------|------------------------------------------|
| 25676     | Rasa1    | CATCTAATAAACGCCTTCGTCA   | TGGTAGTTTATGAGCTTCTTCAATA<br>TG | 66   | Intracellular Signaling                  |
| 192213    | Rasgrf1  | GGCTGGTCTCAAACCTTAGGATG  | TCATGCCGTGAATCCCAGCTA           | 49   | Intracellular Signaling                  |
| 114513    | Rasgrf2  | AGGAGCAAGCAGGGAAAGA      | TCTCAATCAAAATGTCTGCGTAA         | 58   | Intracellular Signaling                  |
| 29434     | Rasgrp1  | GTTTCATCCATGTGGCTCAGA    | ACAGCCATTAGCGTGTGAA             | 22   | Intracellular Signaling                  |
| 54289     | Rgs1     | GCAAGAAGAACAGGGTGAGG     | CACTGTATTTTCATGACAGTACCACA      | 12   | Signaling feedback                       |
| 84583     | Rgs2     | AACTTTATCAAGCCTTCTCCTGA  | ACGCTCTGAATGCAGCAAG             | 113  | Signaling feedback                       |
| 54293     | Rgs3     | CCGGAAGAGAAAGAGCAAAAA    | GGCCCCAGGAGATTCAAT              | 124  | Signaling feedback                       |
| 29480     | Rgs4     | CAAGATGTGCAAAGGACTCG     | CCAGCCGATGTTTCATATCC            | 4    | Signaling feedback                       |
| 54294     | Rgs5     | CCAGAGAAGCCTGCCAAG       | GAAGTTTGTCAGGGATTGG             | 25   | Signaling feedback                       |
| 81767     | Rpl19    | TGCCGGAAGAACACCTTG       | GCAGGATCCTCATCCTTCG             | 85   | housekeeping                             |
| 157074    | Sdha     | TGCCATCCATTACATGACAGA    | AAATCCTCCCATCTTCAGTCC           | 16   | housekeeping                             |
| 83612     | Slc32a1  | AGGCTCGGAAACTTGACCTT     | GACGCAGTAGATTCCAAGCAC           | 76   | neuromodulatory targets - Ion<br>Channel |
| 83511     | Slc6a2   | AGTGAAGACATCGGGAAAGG     | AACCAGGAGCACAAAGAGGA            | 76   | neuromodulatory targets - Ion<br>Channel |
| 59114     | Slc9a3r1 | CAGGACCGGATTGTGGAG       | AGCAGCTTGGCTTCATCAC             | 121  | neuromodulatory targets - Ion<br>Channel |
| 24797     | Sst      | AGCCCAACCAGACAGAGAAC     | CCTCATCTCGTCCTGCTCA             | 1    | neuromodulatory regulator                |
| 24949     | Syn1     | GGACGGAAGGGATCACATTA     | TGGTGATCCCAATGAGTG              | 25   | neuromodulatory targets - Ion<br>Channel |
| 24806     | Tac1     | CAGAAAGGCTGCTGTGAGG      | GAAGCGCAAGACACACAGG             | 13   | neuromodulatory regulator                |
| 25085     | Th       | GGGAGCTGAAGGCTTATGGT     | CCTCTGACAGGGAGTGCAG             | 66   | neuromodulatory regulator                |

**Table S4. Selection of genes contributing to variability.**

| No. | Gene Symbol | PC1 loadings | PC2 loadings  | PC3 loadings  | PC4 loadings  | PC5 loadings  |
|-----|-------------|--------------|---------------|---------------|---------------|---------------|
| 1   | Th          | <b>0.444</b> | <b>-0.137</b> | <b>0.208</b>  | -0.218        | 0.051         |
| 2   | Dbh         | <b>0.317</b> | <b>-0.068</b> | 0.107         | <b>-0.258</b> | 0.005         |
| 3   | Gabrq       | <b>0.228</b> | <b>-0.006</b> | 0.101         | 0.040         | 0.081         |
| 4   | Gal         | <b>0.212</b> | 0.016         | 0.095         | -0.117        | <b>0.144</b>  |
| 5   | Rgs4        | <b>0.202</b> | 0.002         | 0.102         | 0.069         | 0.024         |
| 6   | Slc6a2      | 0.186        | <b>-0.053</b> | 0.121         | -0.165        | -0.055        |
| 7   | Phox2b      | 0.162        | 0.089         | 0.057         | 0.040         | <b>-0.105</b> |
| 8   | Rasgrp2     | 0.148        | 0.004         | 0.034         | 0.035         | 0.116         |
| 9   | Gria3       | 0.141        | <b>0.215</b>  | -0.173        | -0.090        | 0.015         |
| 10  | Gria2       | 0.133        | 0.160         | -0.105        | -0.017        | -0.009        |
| 11  | Rgs2        | 0.132        | 0.049         | 0.106         | 0.048         | -0.067        |
| 12  | Rasgrf2     | 0.131        | 0.055         | 0.052         | 0.008         | 0.139         |
| 13  | Cacna1d     | 0.128        | 0.074         | 0.080         | 0.059         | 0.077         |
| 14  | Grin 2a     | 0.128        | 0.098         | -0.048        | 0.062         | 0.106         |
| 15  | Dusp6       | 0.115        | 0.047         | 0.072         | -0.058        | -0.009        |
| 16  | Prkca       | 0.101        | <b>0.227</b>  | <b>-0.435</b> | -0.192        | -0.082        |
| 17  | Ppp5c       | 0.099        | 0.113         | -0.139        | -0.017        | -0.025        |
| 18  | Hprt1       | 0.097        | 0.081         | 0.016         | <b>0.115</b>  | 0.019         |
| 19  | Grin1       | 0.088        | 0.094         | 0.146         | <b>0.166</b>  | -0.007        |
| 20  | Atf2        | 0.088        | 0.096         | -0.007        | 0.069         | 0.052         |
| 21  | Fosl1       | 0.086        | <b>0.068</b>  | 0.113         | -0.098        | -0.218        |
| 22  | Araf        | 0.085        | 0.062         | -0.011        | 0.083         | 0.016         |
| 23  | Ptpn1       | 0.085        | 0.050         | 0.093         | -0.049        | 0.071         |
| 24  | Map2k1      | 0.085        | 0.064         | 0.009         | <b>0.116</b>  | 0.017         |
| 25  | Grin2b      | 0.084        | 0.112         | 0.021         | 0.012         | 0.048         |
| 26  | Mapk1       | 0.083        | 0.096         | -0.041        | 0.100         | 0.042         |
| 27  | Ace         | 0.082        | 0.038         | 0.103         | 0.001         | 0.084         |
| 28  | Rgs3        | 0.079        | 0.059         | <b>-0.172</b> | -0.194        | 0.069         |
| 29  | Gabra2      | 0.070        | 0.120         | -0.003        | 0.113         | 0.102         |
| 30  | Gabra4      | 0.069        | 0.066         | 0.018         | 0.145         | 0.089         |
| 31  | Pak1        | 0.064        | 0.065         | 0.032         | 0.093         | 0.050         |
| 32  | Syn1        | 0.050        | 0.119         | 0.045         | 0.076         | 0.052         |
| 33  | Ppp2r1a     | 0.048        | 0.062         | 0.039         | 0.102         | 0.050         |
| 34  | Adrbk1      | 0.044        | 0.106         | -0.019        | 0.038         | 0.030         |
| 35  | Raf1        | 0.043        | 0.196         | <b>-0.275</b> | -0.166        | 0.035         |
| 36  | Pdpk1       | 0.041        | 0.130         | -0.027        | 0.001         | 0.066         |
| 37  | Elk1        | 0.039        | 0.192         | -0.060        | -0.088        | 0.083         |
| 38  | Akt1        | 0.039        | 0.065         | -0.003        | 0.043         | 0.082         |
| 39  | Prkce       | 0.037        | 0.103         | 0.111         | 0.082         | 0.067         |
| 40  | Jund        | 0.036        | 0.033         | 0.099         | 0.051         | 0.002         |
| 41  | Map2k7      | 0.032        | 0.062         | -0.064        | 0.047         | 0.044         |
| 42  | Rasa1       | 0.028        | 0.100         | -0.063        | 0.016         | 0.092         |
| 43  | Ppp1cc      | 0.024        | 0.083         | 0.072         | 0.024         | 0.059         |
| 44  | Map3k12     | 0.022        | 0.107         | 0.085         | 0.038         | 0.117         |
| 45  | Grin2c      | 0.021        | 0.061         | 0.000         | -0.122        | -0.019        |

**Table S4. Selection of genes contributing to variability.**

| No. | Gene Symbol | PC1 loadings  | PC2 loadings | PC3 loadings  | PC4 loadings  | PC5 loadings  |
|-----|-------------|---------------|--------------|---------------|---------------|---------------|
| 46  | Ppp1cb      | 0.020         | 0.071        | 0.013         | 0.024         | 0.023         |
| 47  | Arrb1       | 0.017         | 0.100        | 0.022         | 0.041         | 0.077         |
| 48  | Gabra1      | 0.016         | 0.196        | -0.099        | <b>0.315</b>  | <b>0.144</b>  |
| 49  | Pik3r3      | 0.014         | 0.088        | -0.020        | 0.006         | 0.123         |
| 50  | Hcn2        | 0.014         | 0.075        | -0.112        | -0.071        | 0.037         |
| 51  | Rpl19       | 0.004         | 0.012        | -0.034        | -0.032        | -0.008        |
| 52  | Ptpn2       | 0.002         | 0.047        | 0.092         | -0.032        | 0.021         |
| 53  | Creb1       | 0.000         | 0.079        | 0.076         | -0.061        | 0.070         |
| 54  | Itpr1       | -0.001        | 0.058        | 0.091         | -0.073        | 0.123         |
| 55  | Mapk7       | -0.003        | 0.055        | 0.047         | -0.083        | 0.058         |
| 56  | Actb        | -0.004        | -0.012       | 0.034         | 0.032         | 0.008         |
| 57  | Mapk3       | -0.005        | 0.042        | -0.085        | -0.014        | 0.037         |
| 58  | Jun         | -0.005        | 0.126        | 0.117         | 0.018         | -0.066        |
| 59  | Egr1        | -0.006        | <b>0.284</b> | 0.113         | 0.013         | <b>-0.369</b> |
| 60  | Plcb1       | -0.011        | <b>0.231</b> | <b>-0.165</b> | -0.049        | 0.122         |
| 61  | Agt         | -0.015        | 0.021        | 0.127         | 0.050         | 0.061         |
| 62  | Arrb2       | -0.017        | 0.109        | -0.001        | 0.098         | 0.010         |
| 63  | Agtrap      | -0.017        | 0.063        | -0.011        | -0.045        | 0.076         |
| 64  | Pebp1       | -0.019        | 0.051        | 0.002         | 0.087         | 0.014         |
| 65  | Agtr1a      | -0.021        | 0.029        | 0.136         | -0.182        | 0.096         |
| 66  | Fos         | -0.034        | 0.341        | <b>0.192</b>  | -0.036        | <b>-0.556</b> |
| 67  | Map3k11     | -0.041        | 0.054        | 0.006         | -0.114        | 0.091         |
| 68  | Grk5        | -0.063        | 0.077        | 0.002         | -0.062        | 0.100         |
| 69  | Rasgrf1     | -0.075        | 0.105        | 0.126         | -0.140        | 0.050         |
| 70  | Gad1        | -0.077        | 0.157        | <b>0.165</b>  | 0.104         | 0.141         |
| 71  | Slc9a3r1    | -0.081        | 0.035        | 0.057         | -0.104        | 0.077         |
| 72  | Hras        | -0.083        | 0.061        | 0.079         | <b>-0.228</b> | 0.104         |
| 73  | Npy1r       | -0.092        | 0.054        | 0.143         | -0.120        | <b>0.149</b>  |
| 74  | Junb        | -0.092        | 0.209        | 0.100         | -0.035        | <b>-0.186</b> |
| 75  | Kcnj2       | -0.105        | 0.116        | 0.037         | <b>-0.277</b> | 0.057         |
| 76  | Rgs1        | -0.105        | 0.026        | 0.113         | <b>-0.221</b> | 0.066         |
| 77  | Crh         | <b>-0.119</b> | 0.068        | 0.056         | <b>-0.248</b> | 0.045         |
| 78  | Npy         | <b>-0.129</b> | 0.088        | <b>0.231</b>  | 0.114         | 0.030         |
| 79  | Slc32a1     | <b>-0.141</b> | 0.118        | <b>0.222</b>  | 0.046         | <b>0.168</b>  |
| 80  | Tac1        | <b>-0.145</b> | 0.115        | 0.139         | -0.109        | 0.092         |
| 81  | Sst         | <b>-0.289</b> | 0.159        | 0.029         | -0.043        | <b>0.168</b>  |

Figure S1

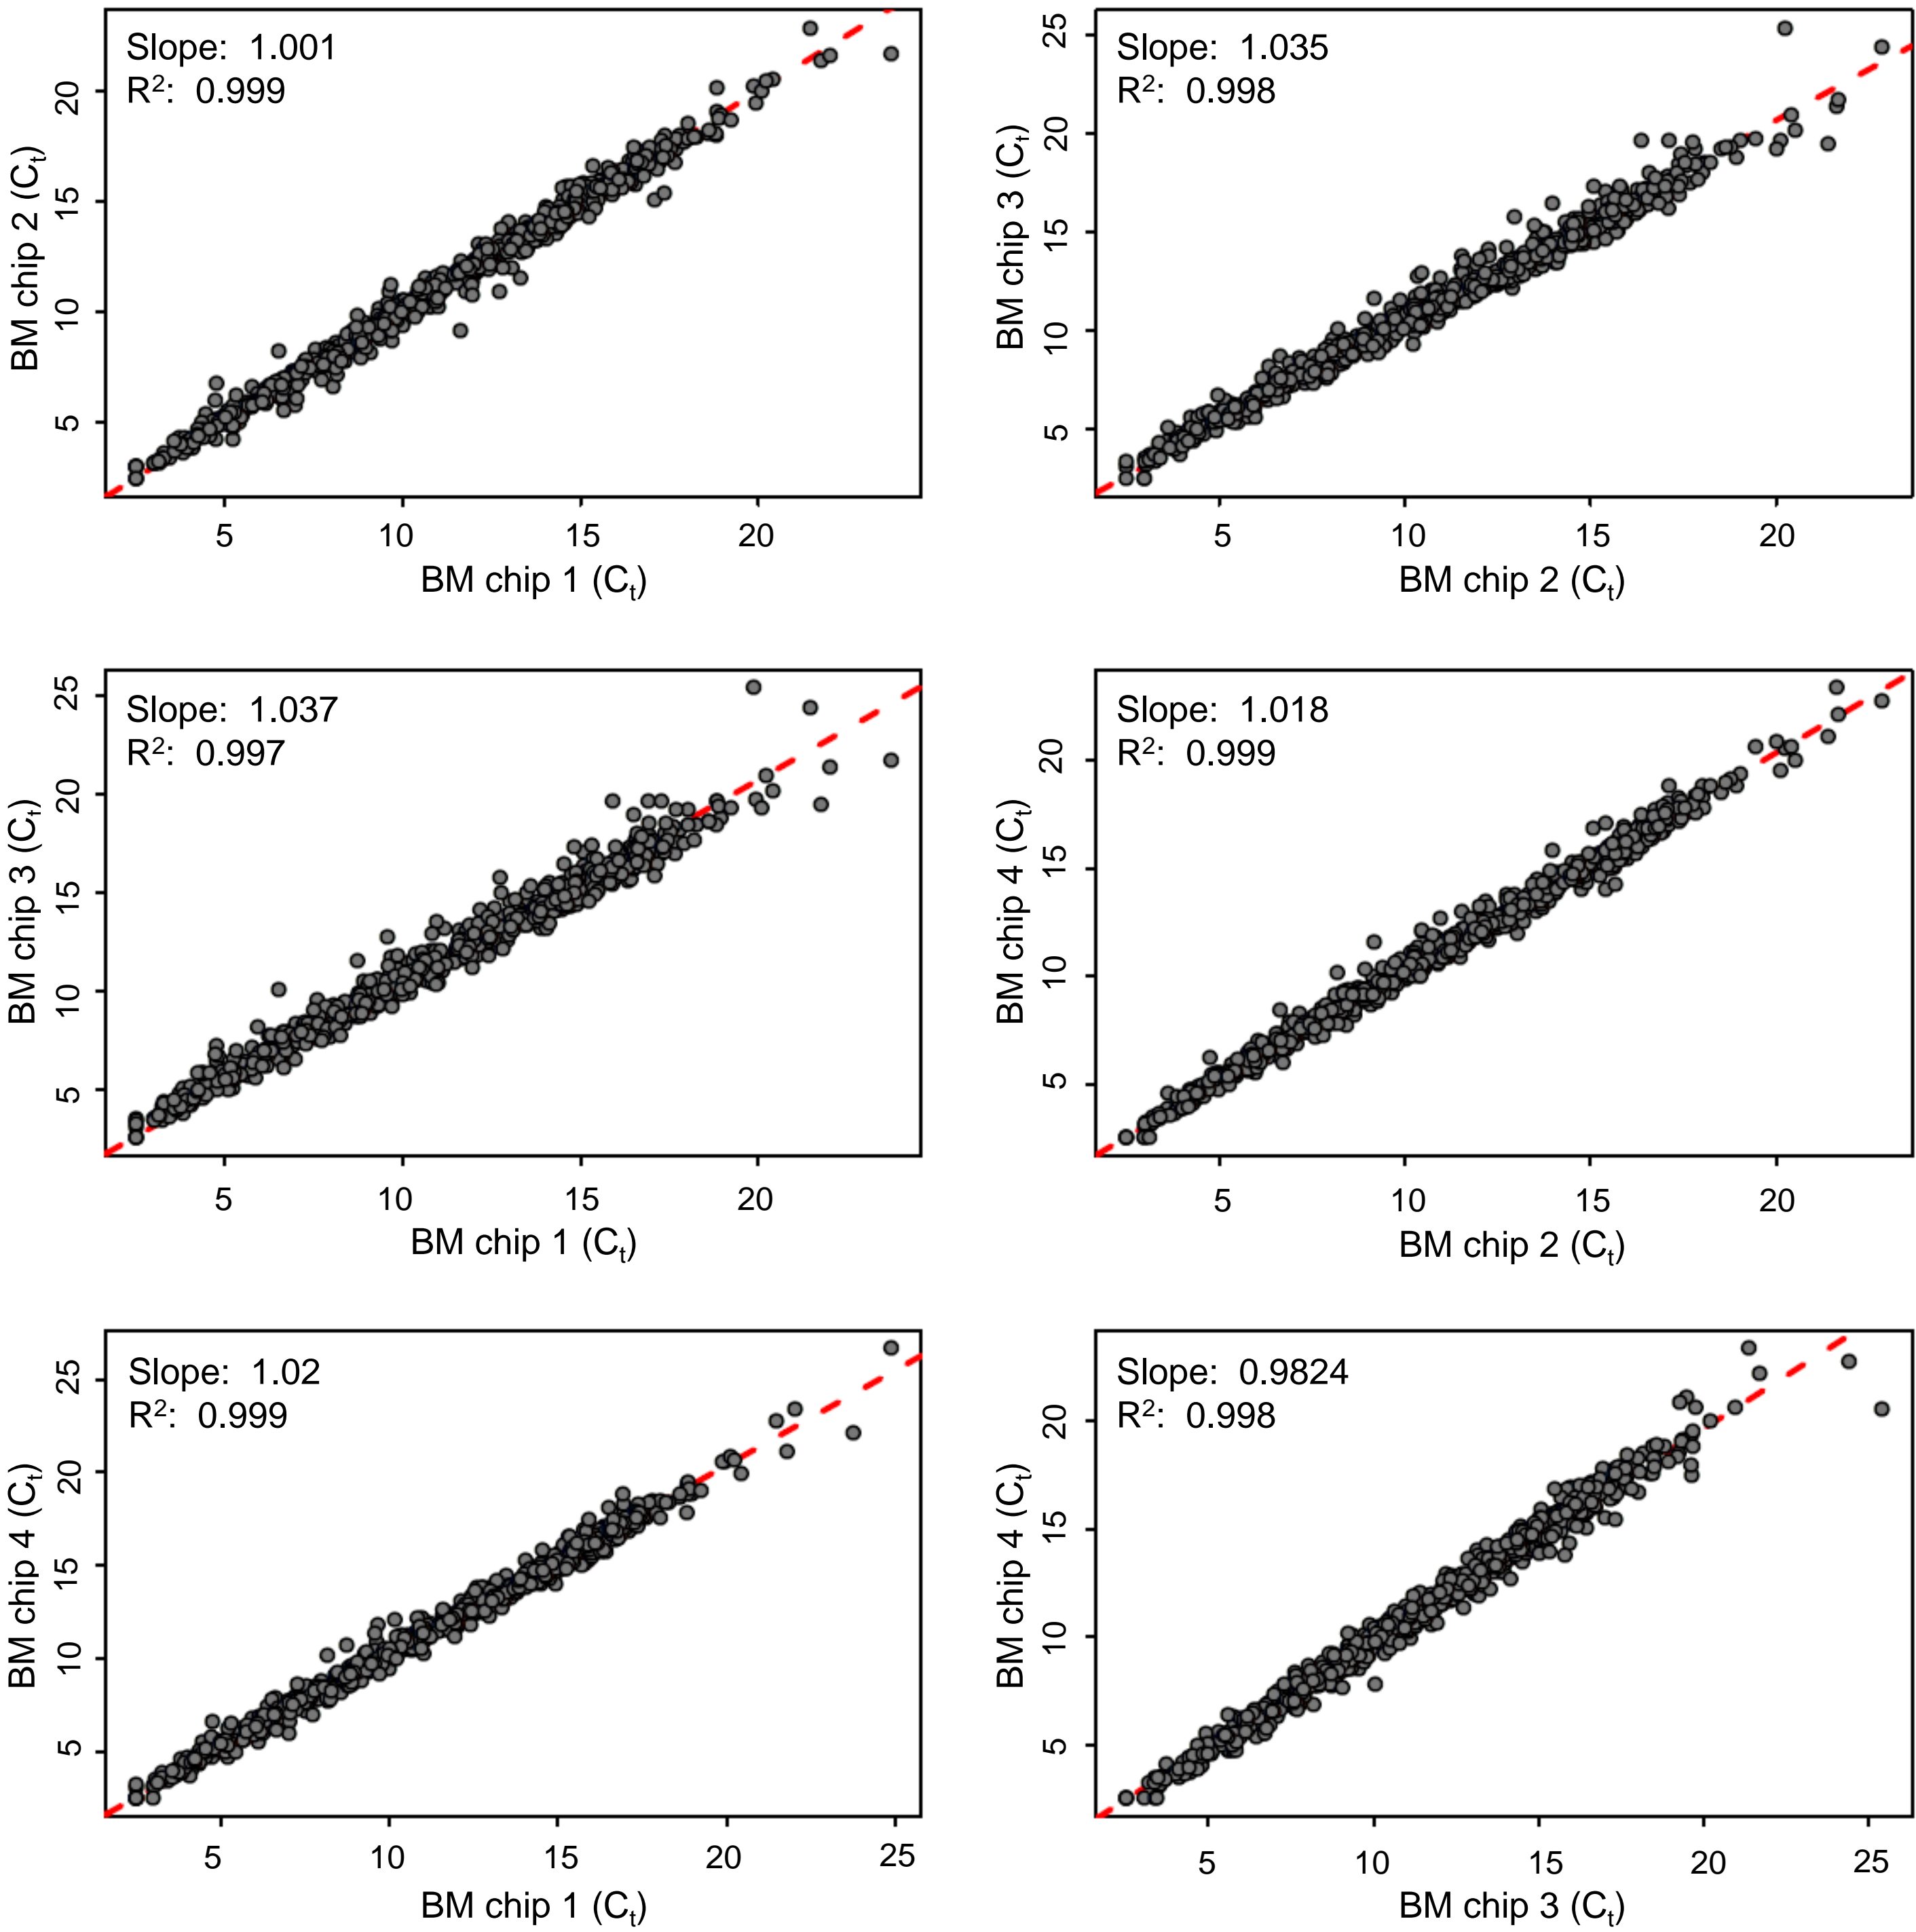

Figure S2

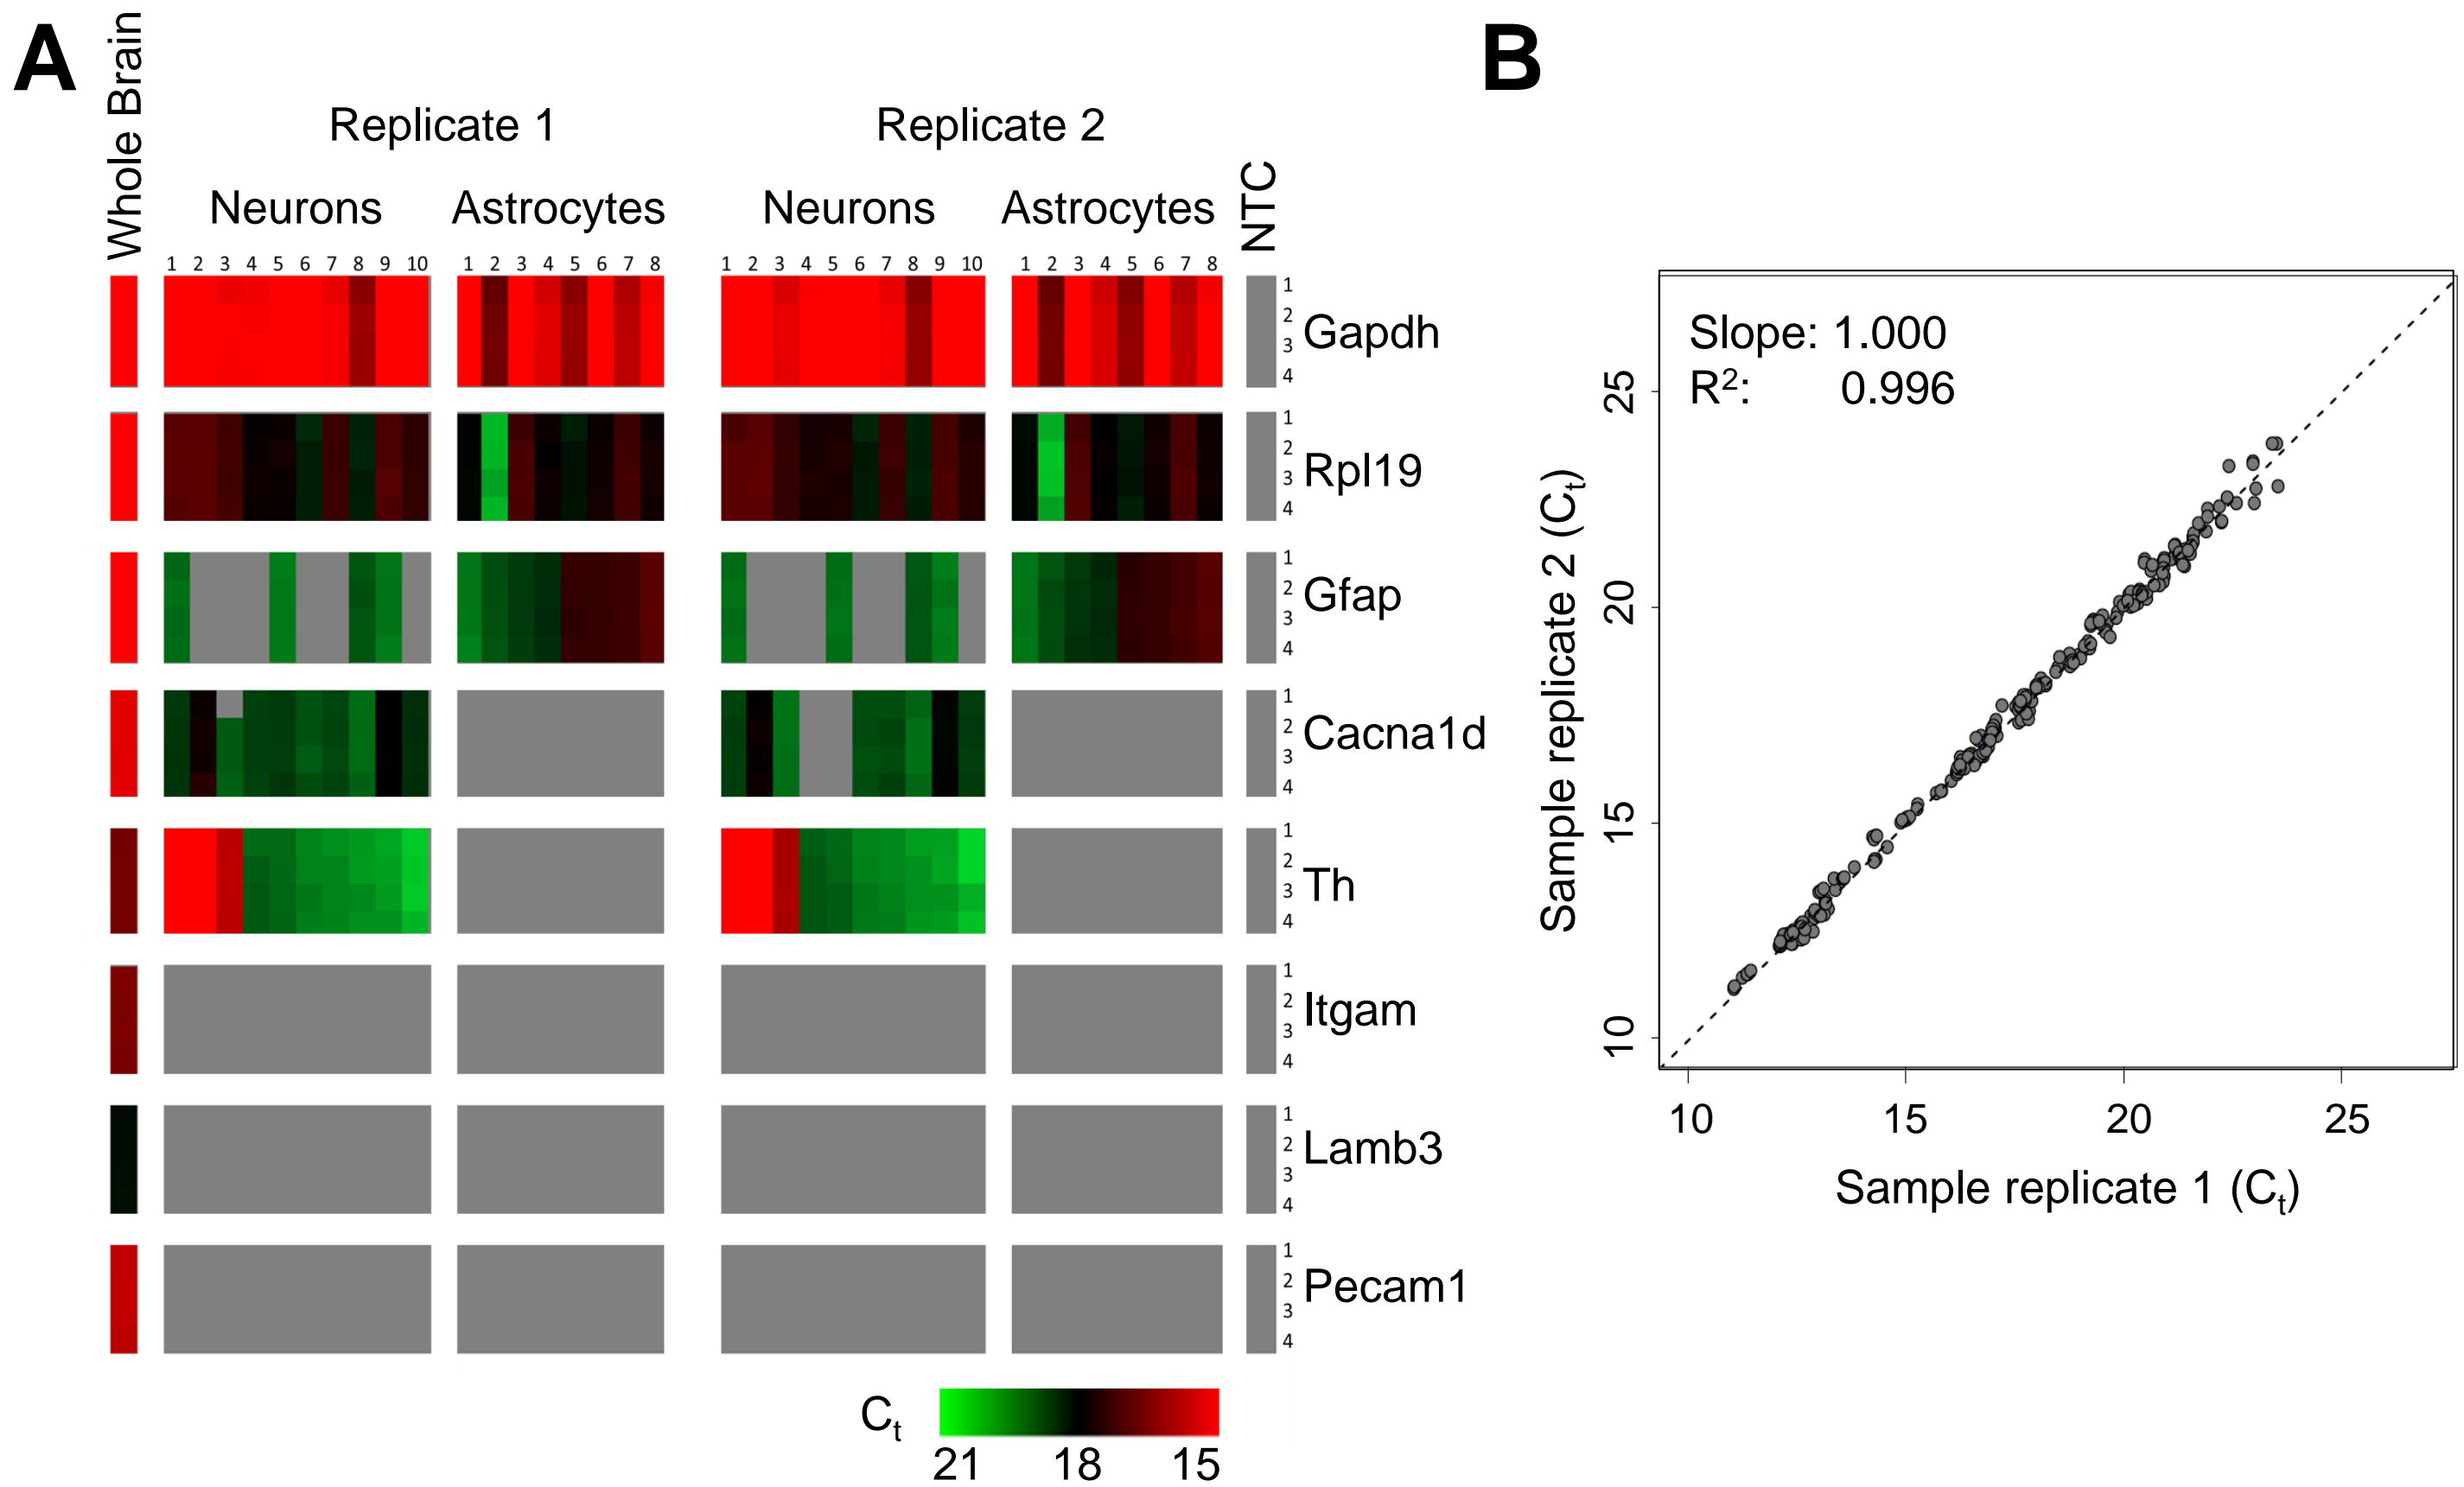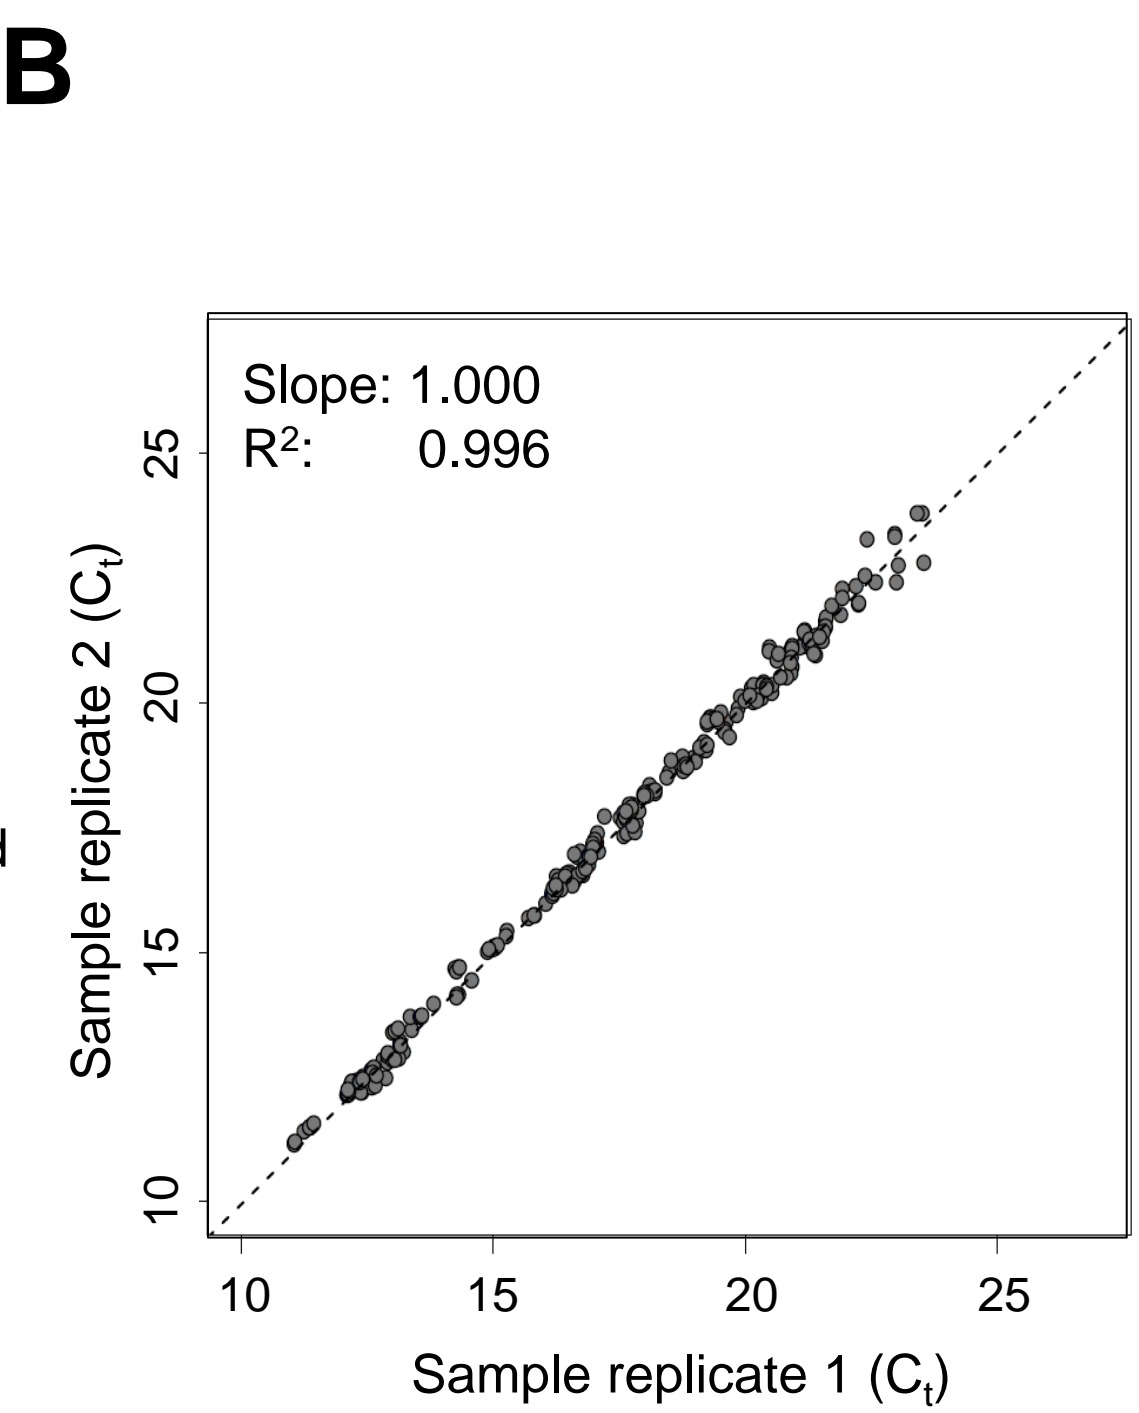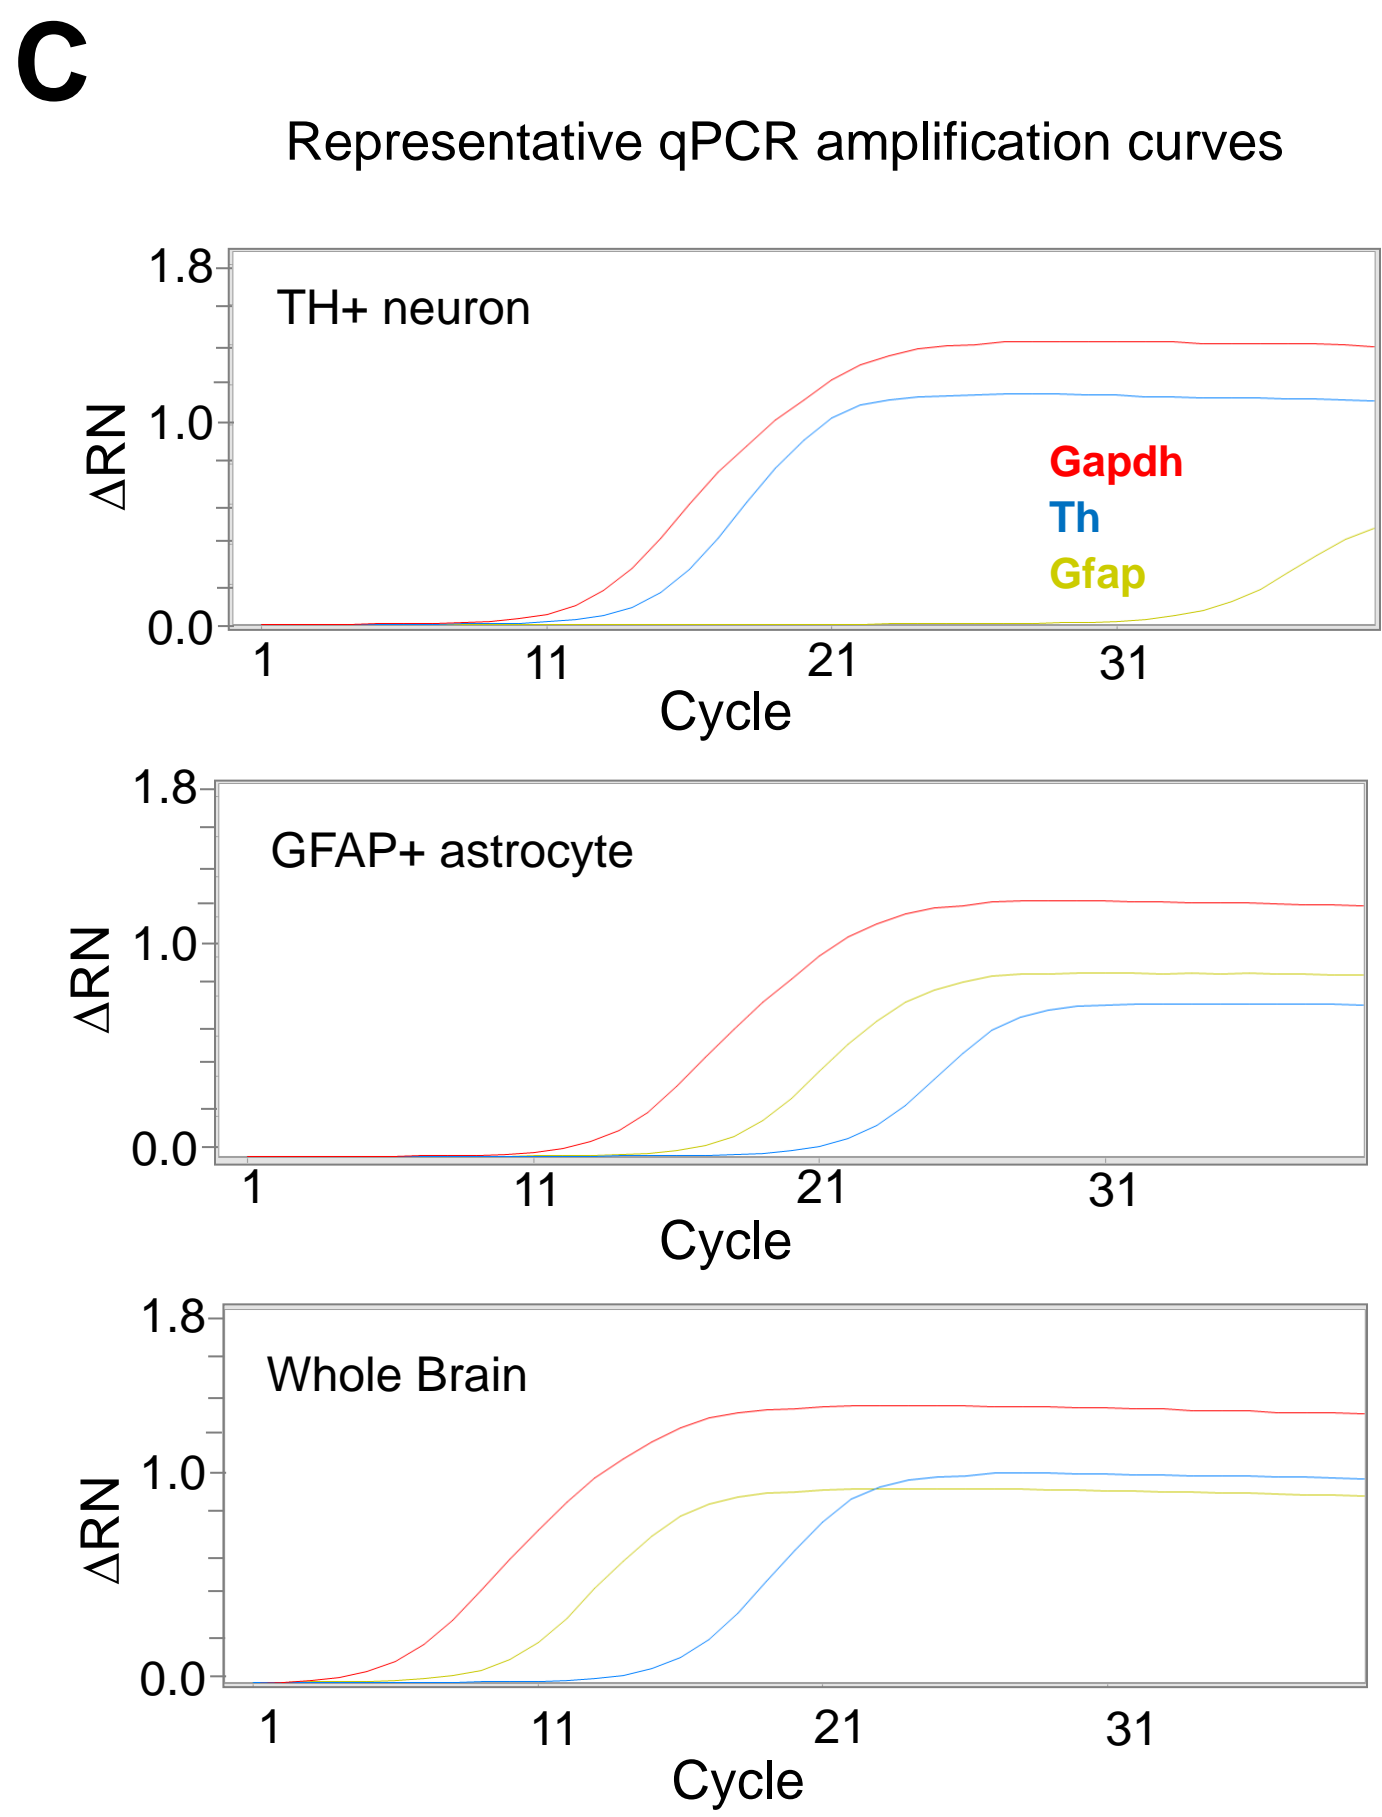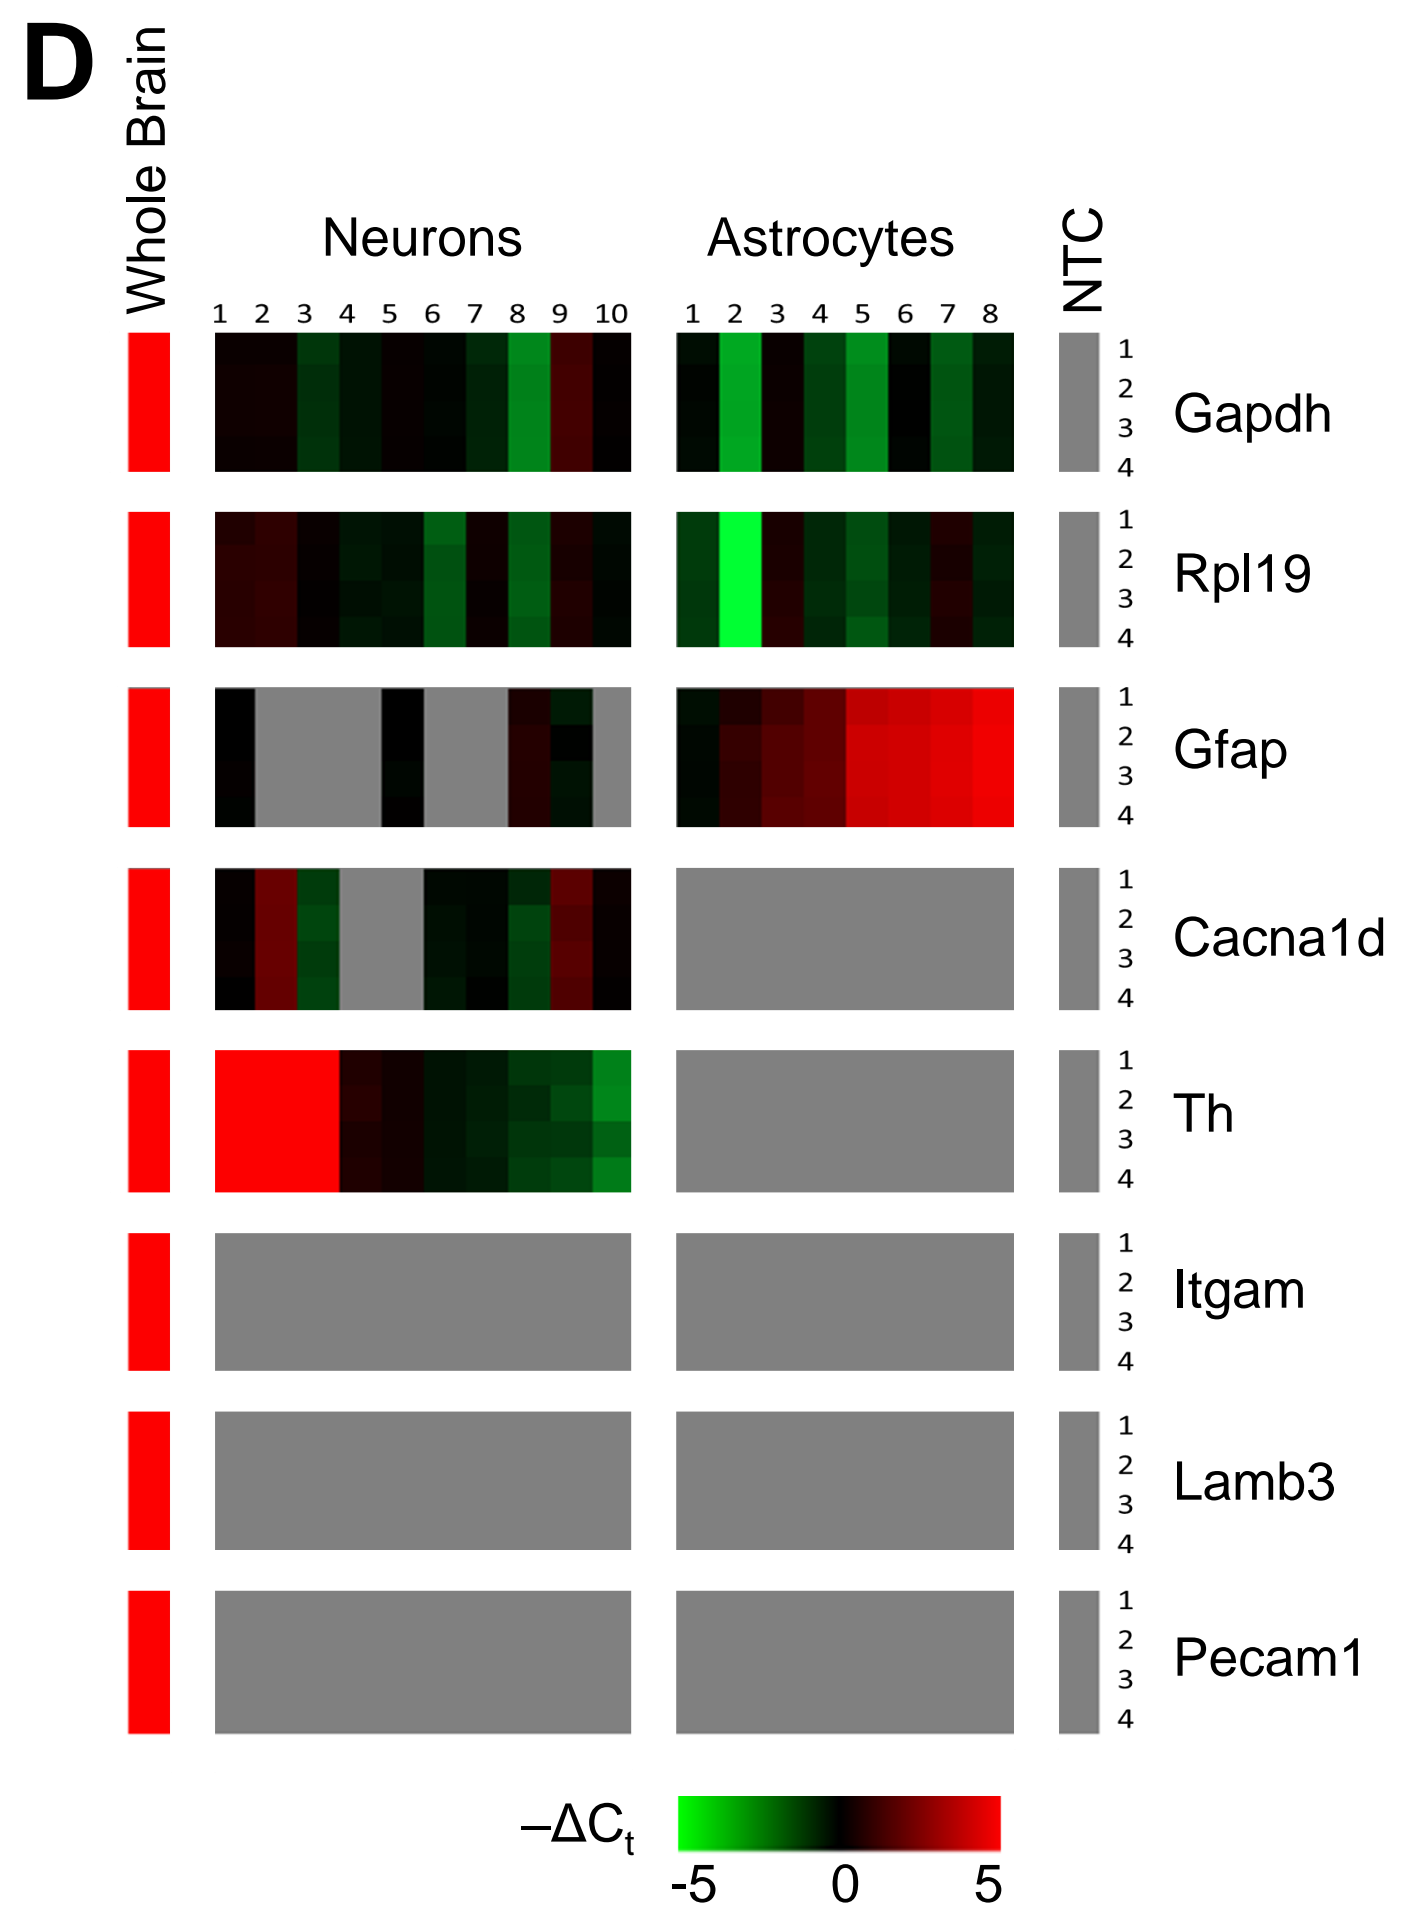



Figure S3

**A**

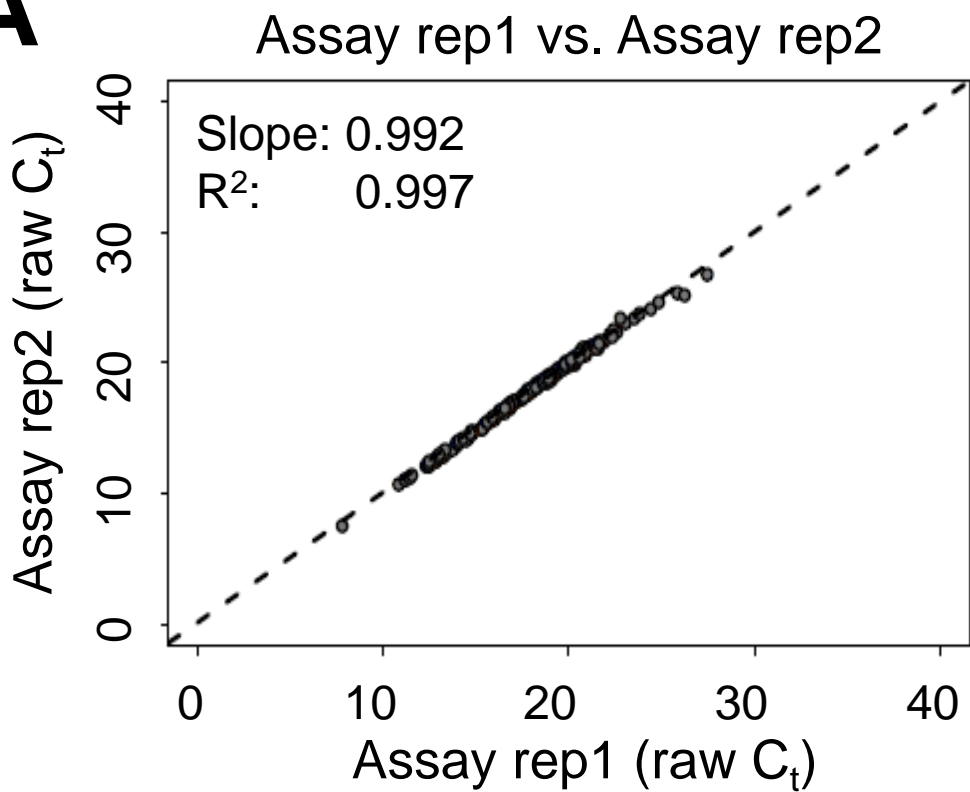

**B**

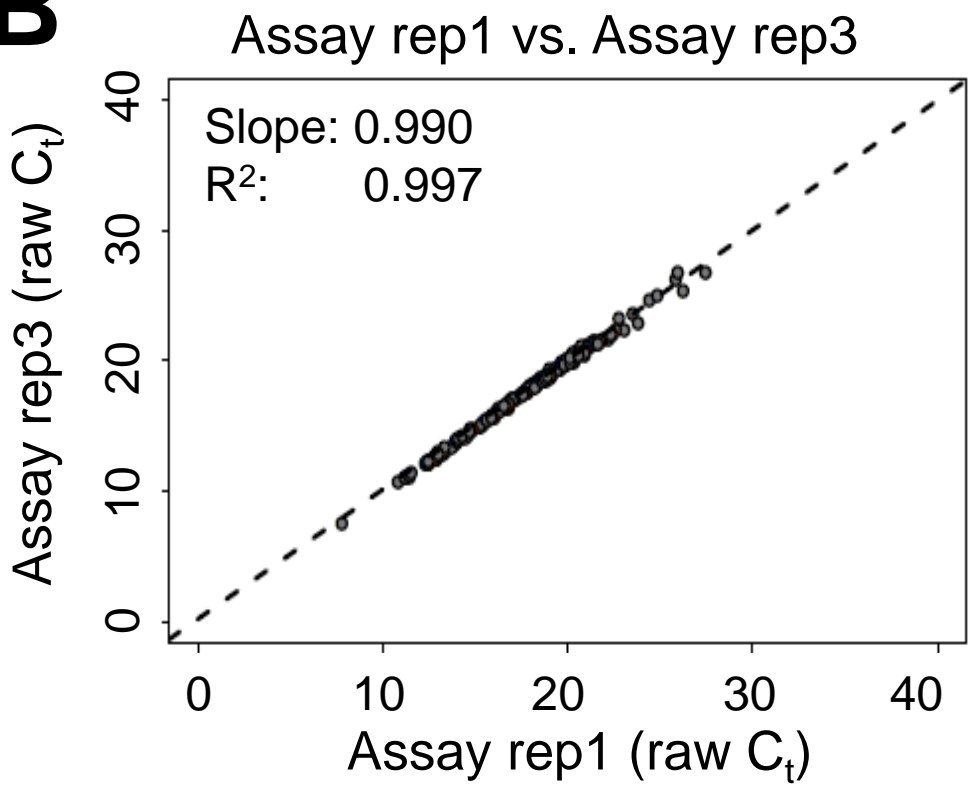

**C**

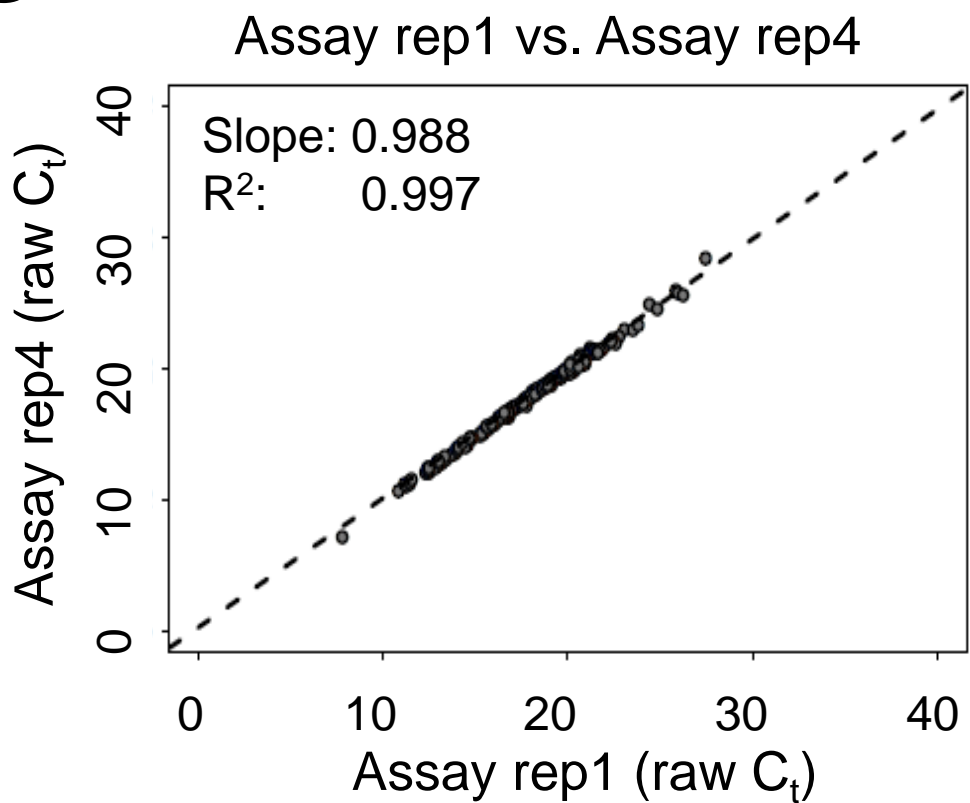

**D**

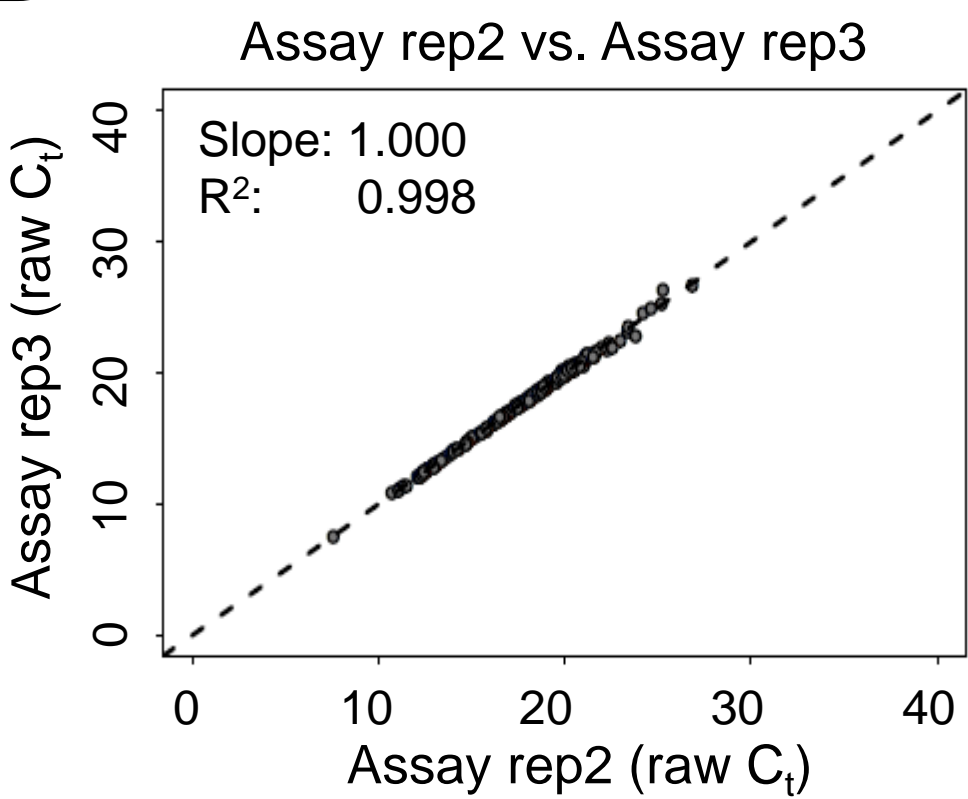

**E**

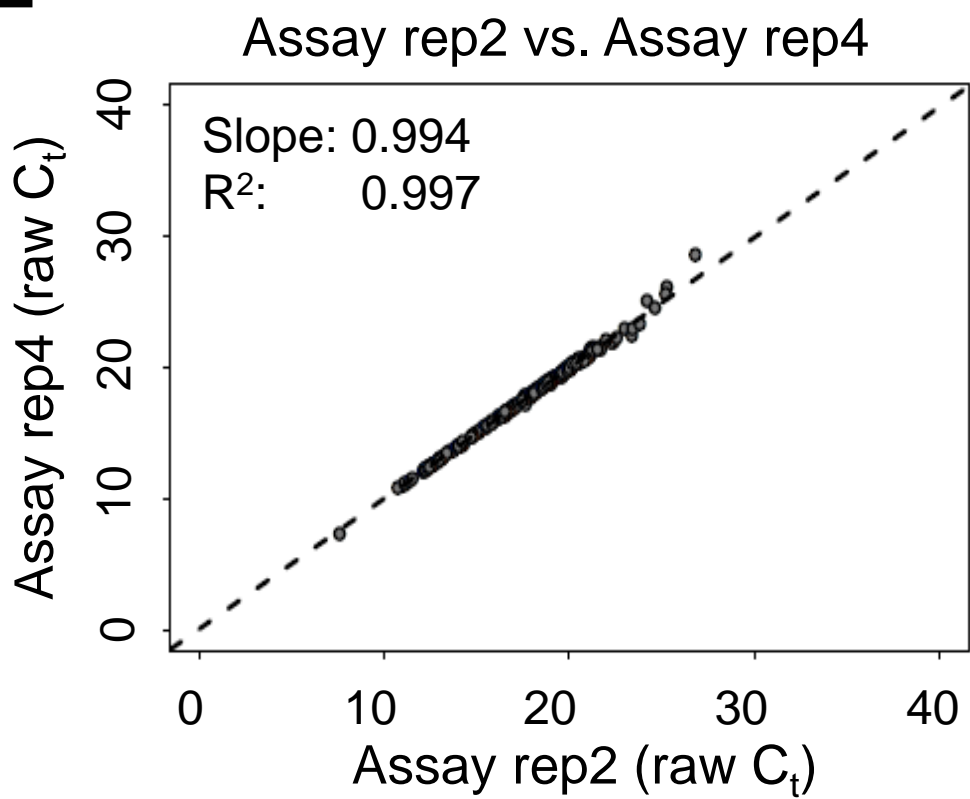

**F**

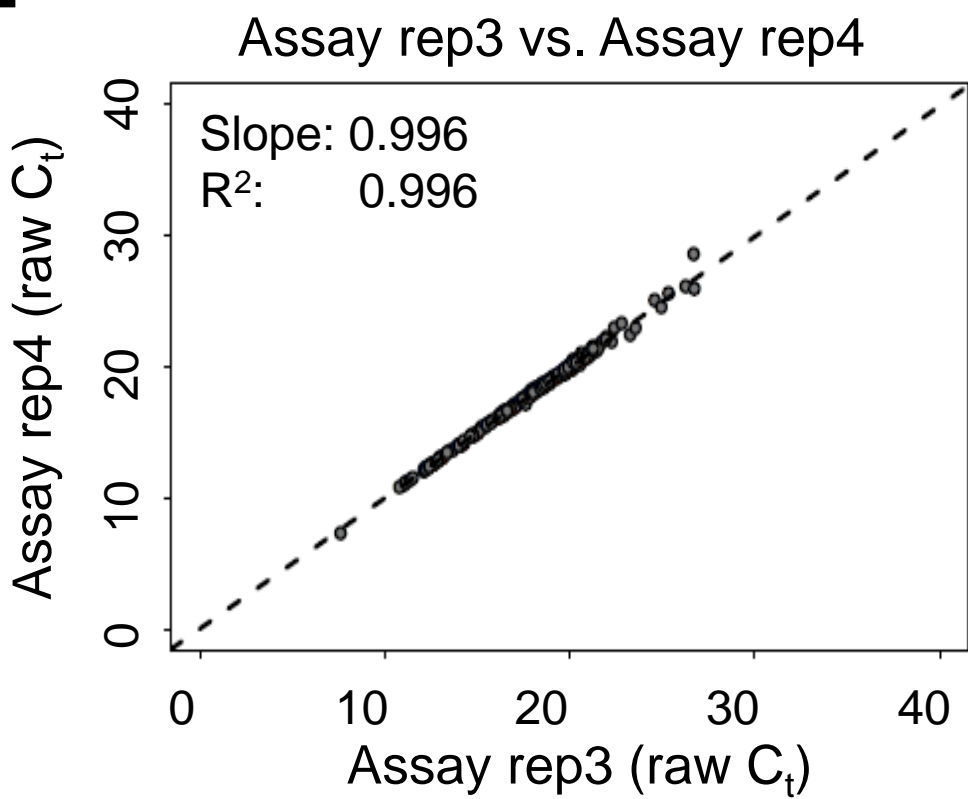

Figure S4

A

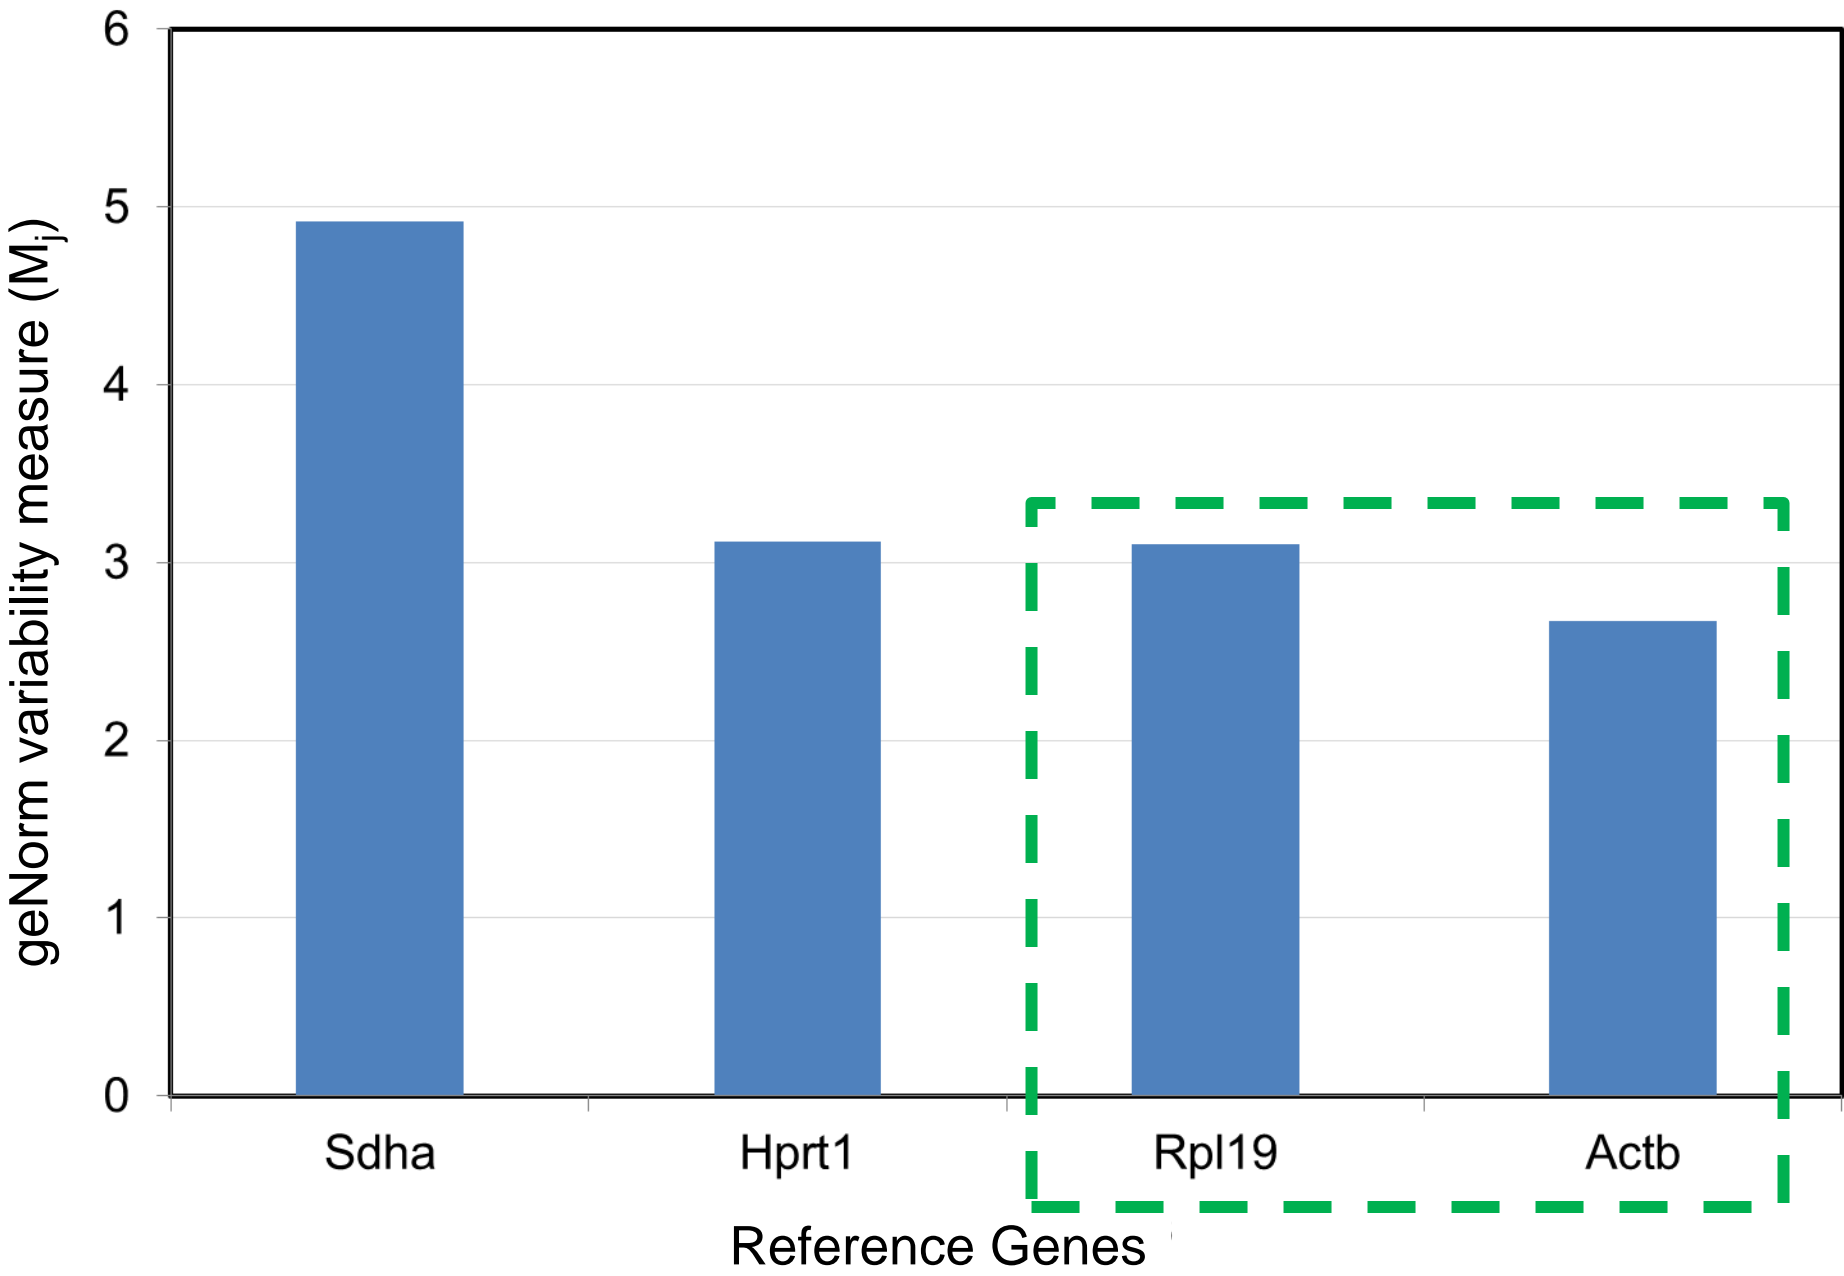

B

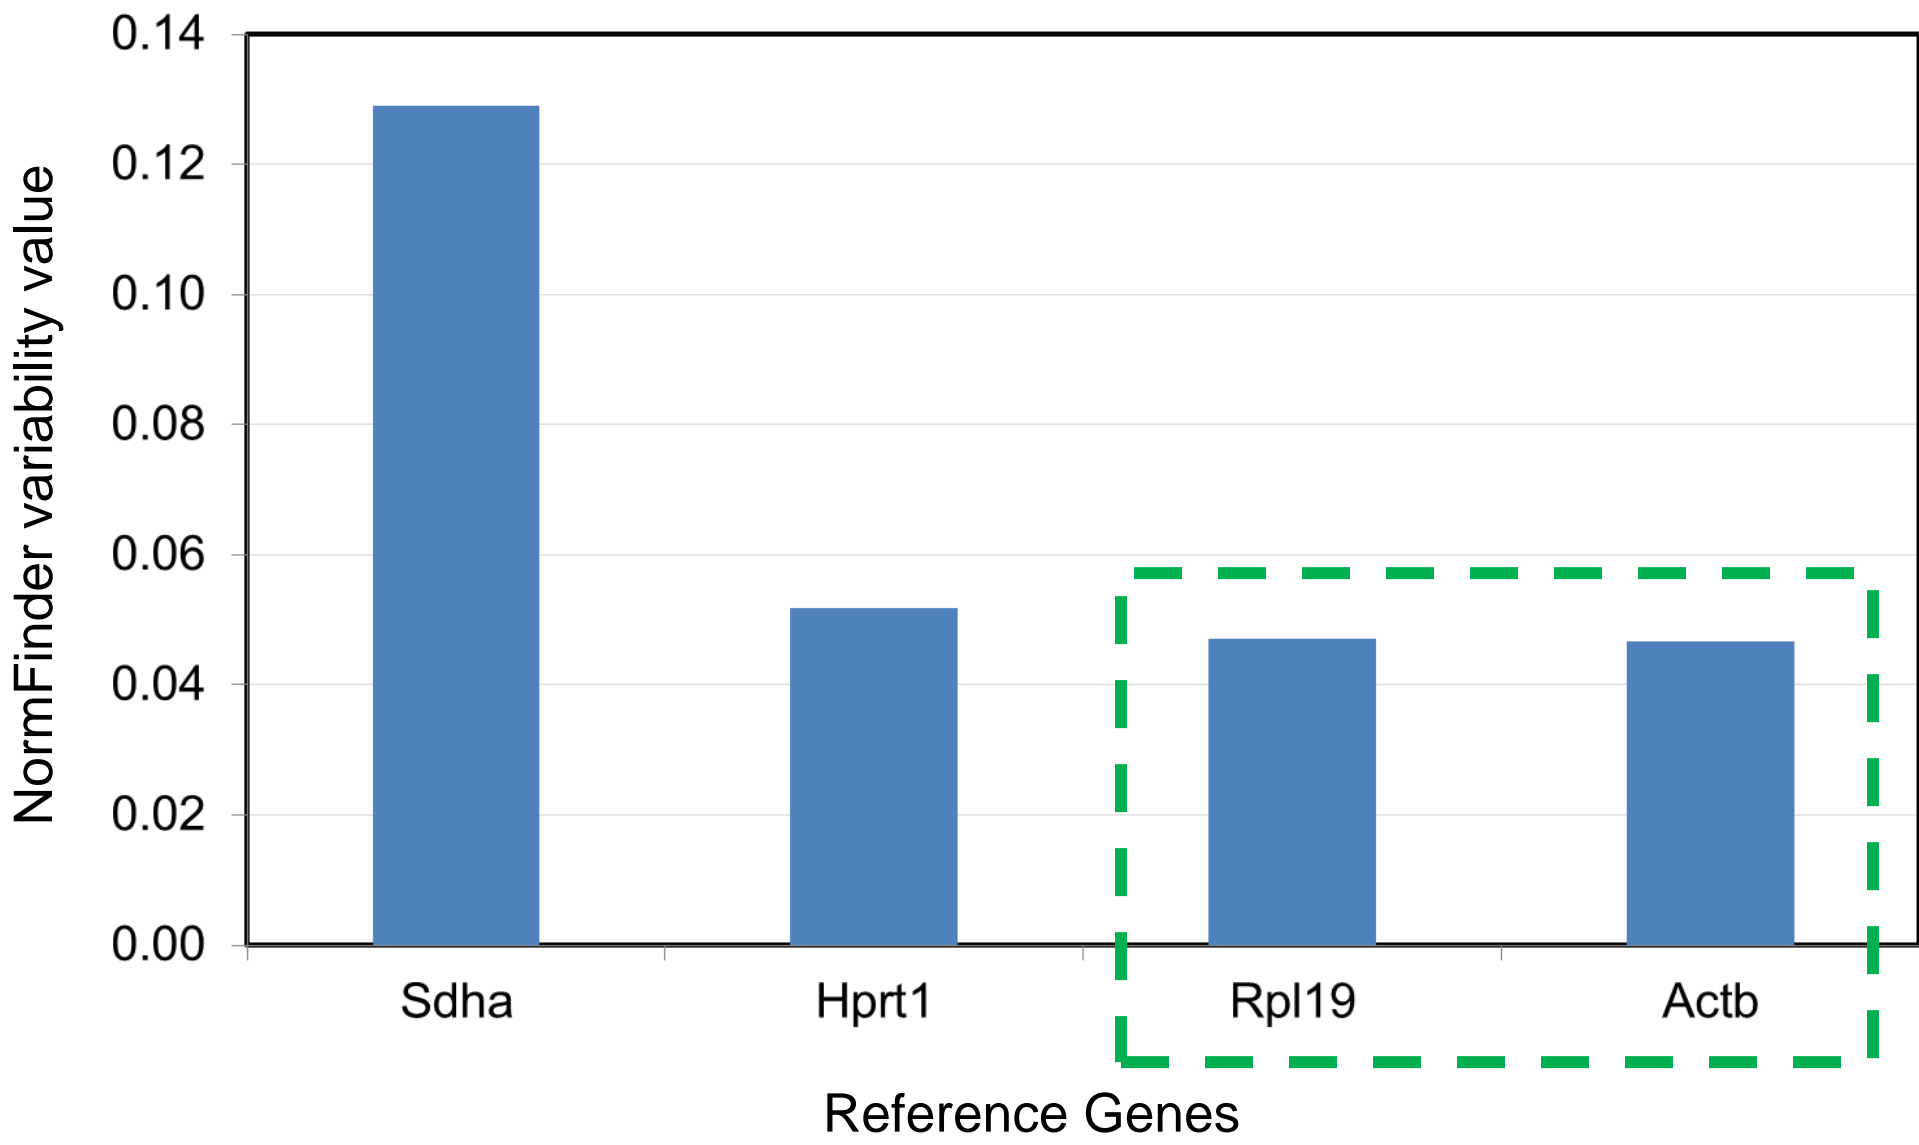

Figure S5

A

Principal component 3 (8.02%)

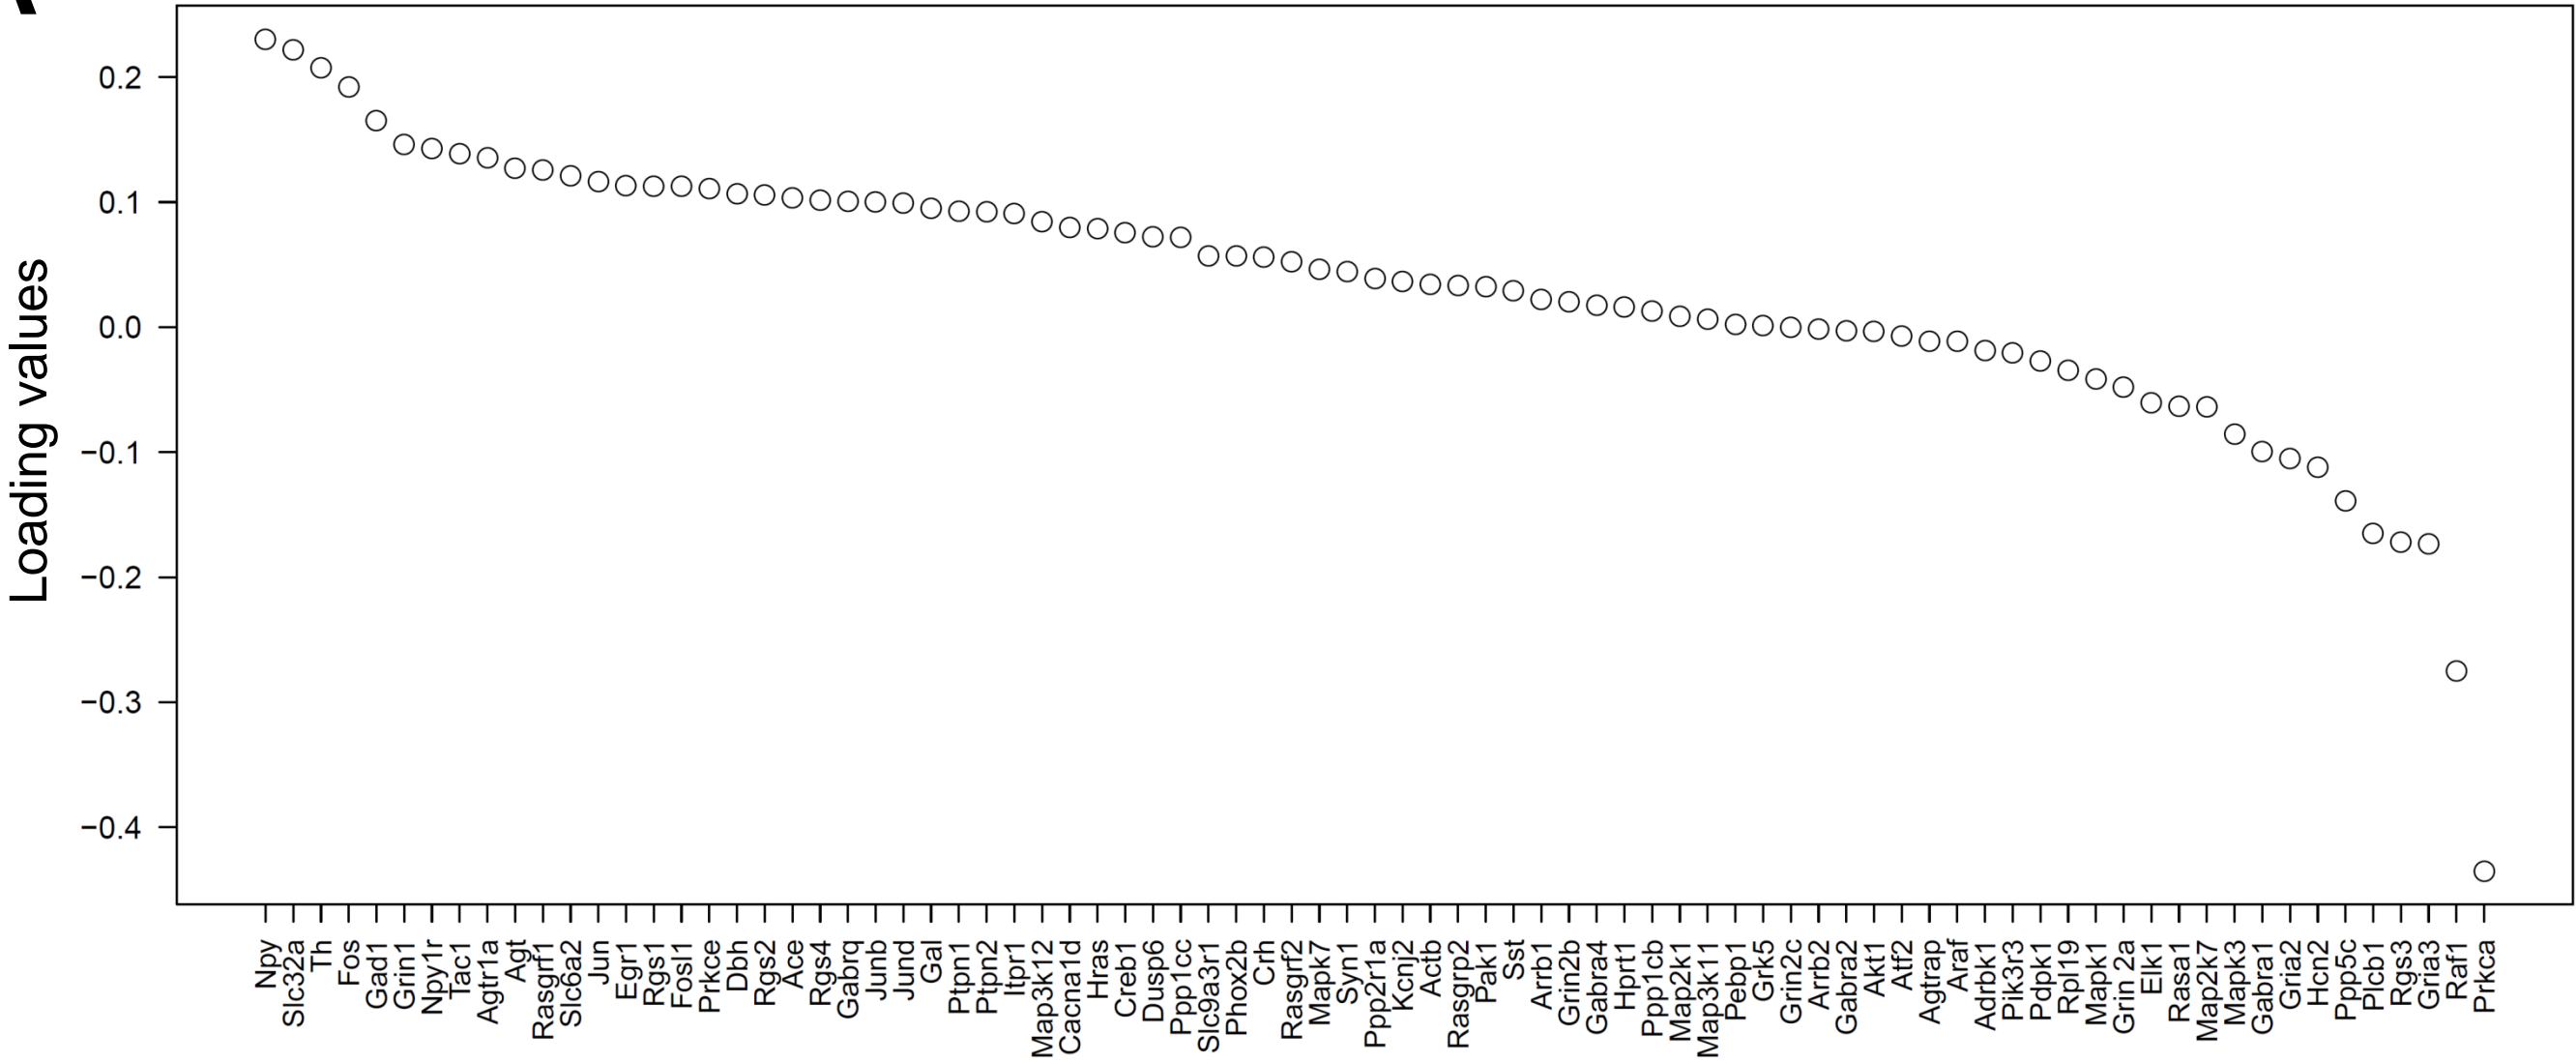

B

Principal component 4 (5.55%)

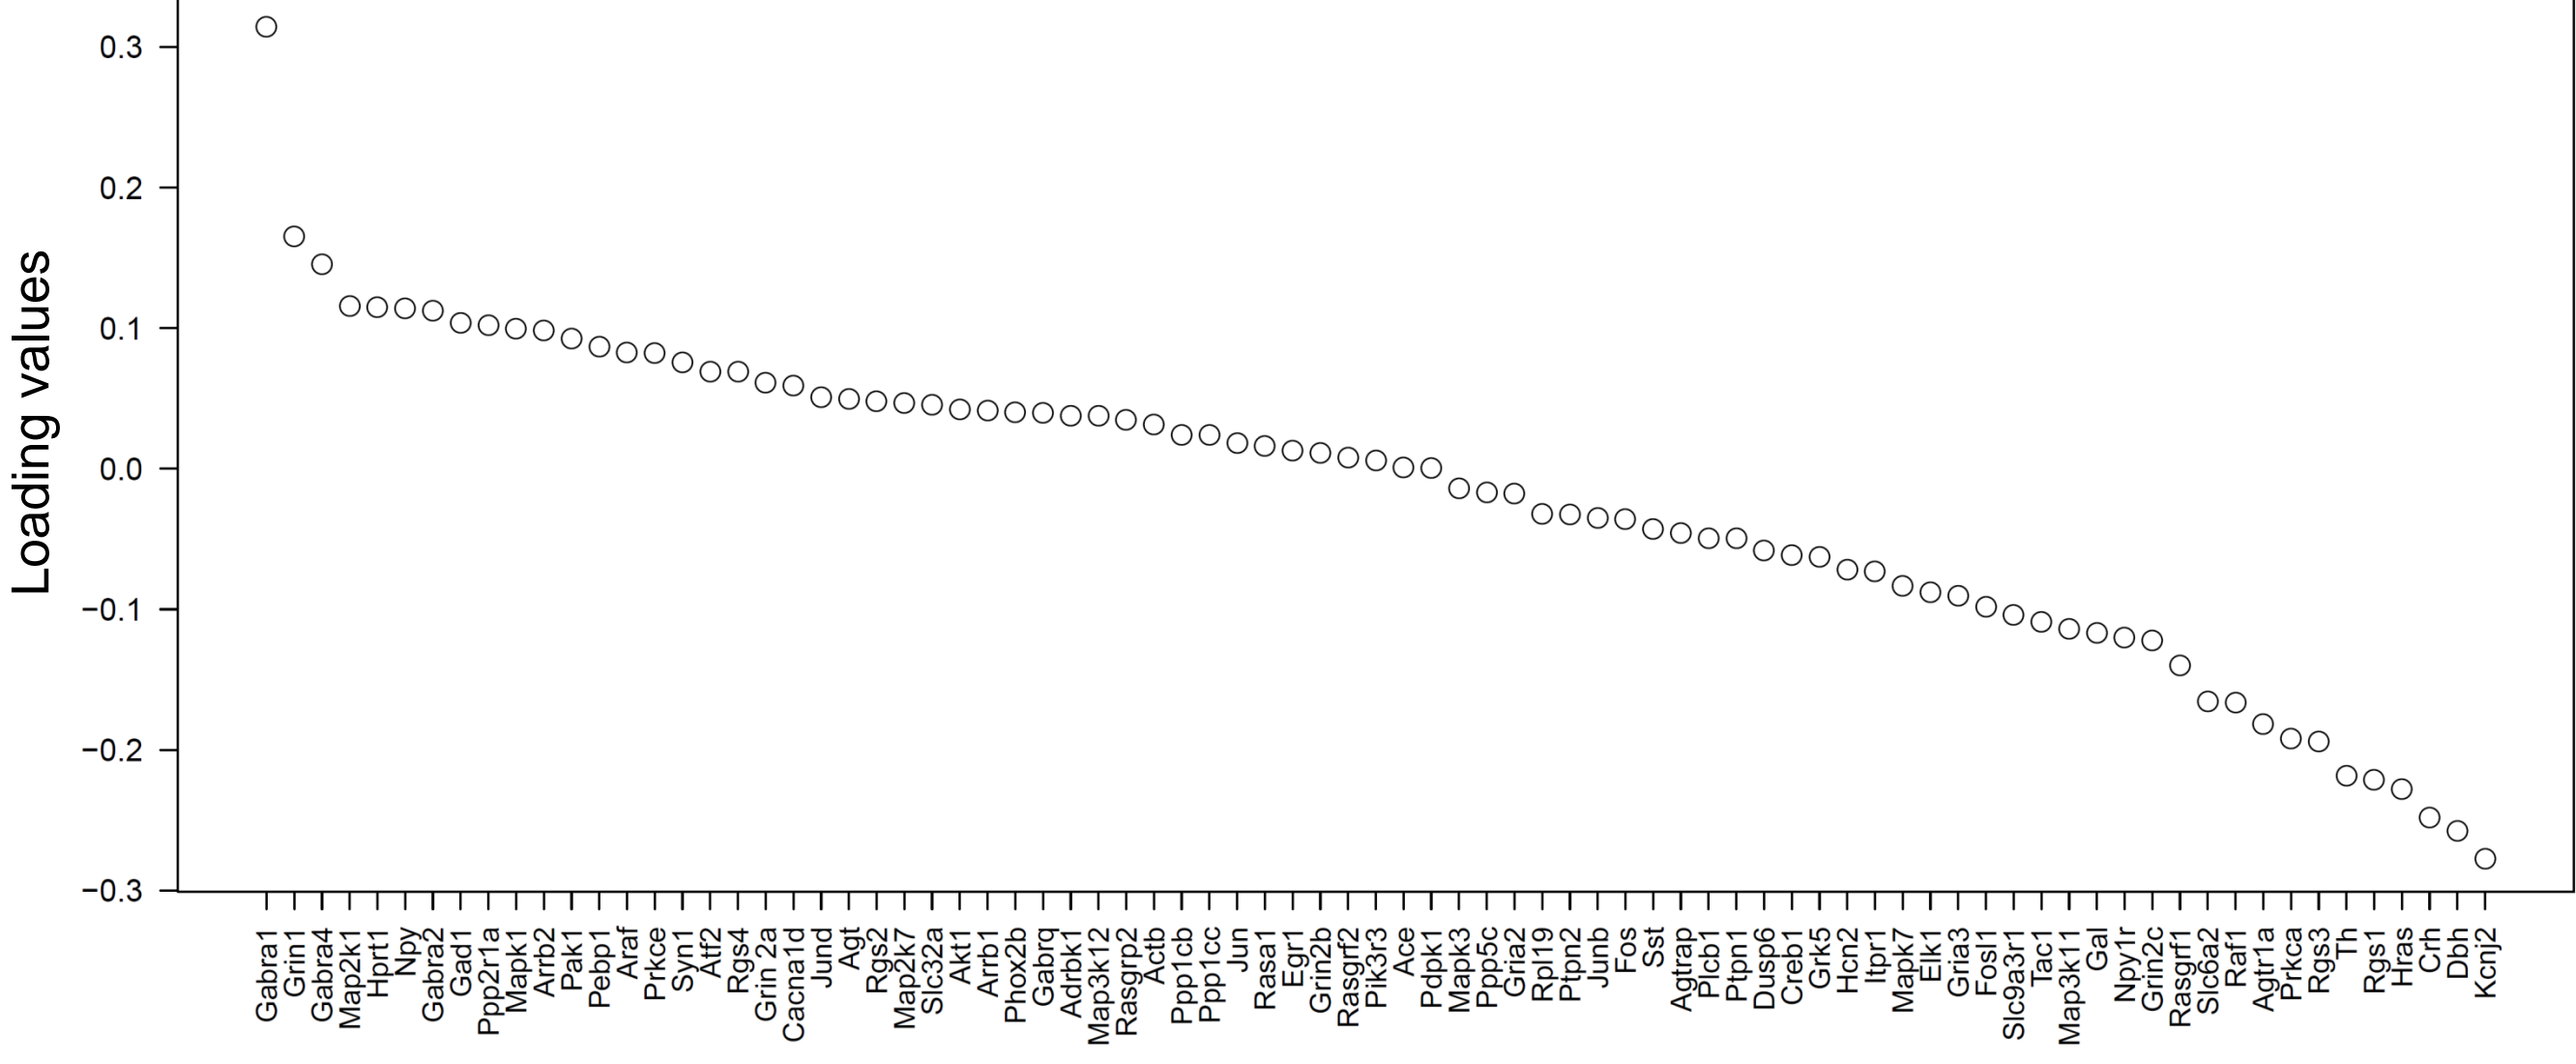

C

Principal component 5 (5.33%)

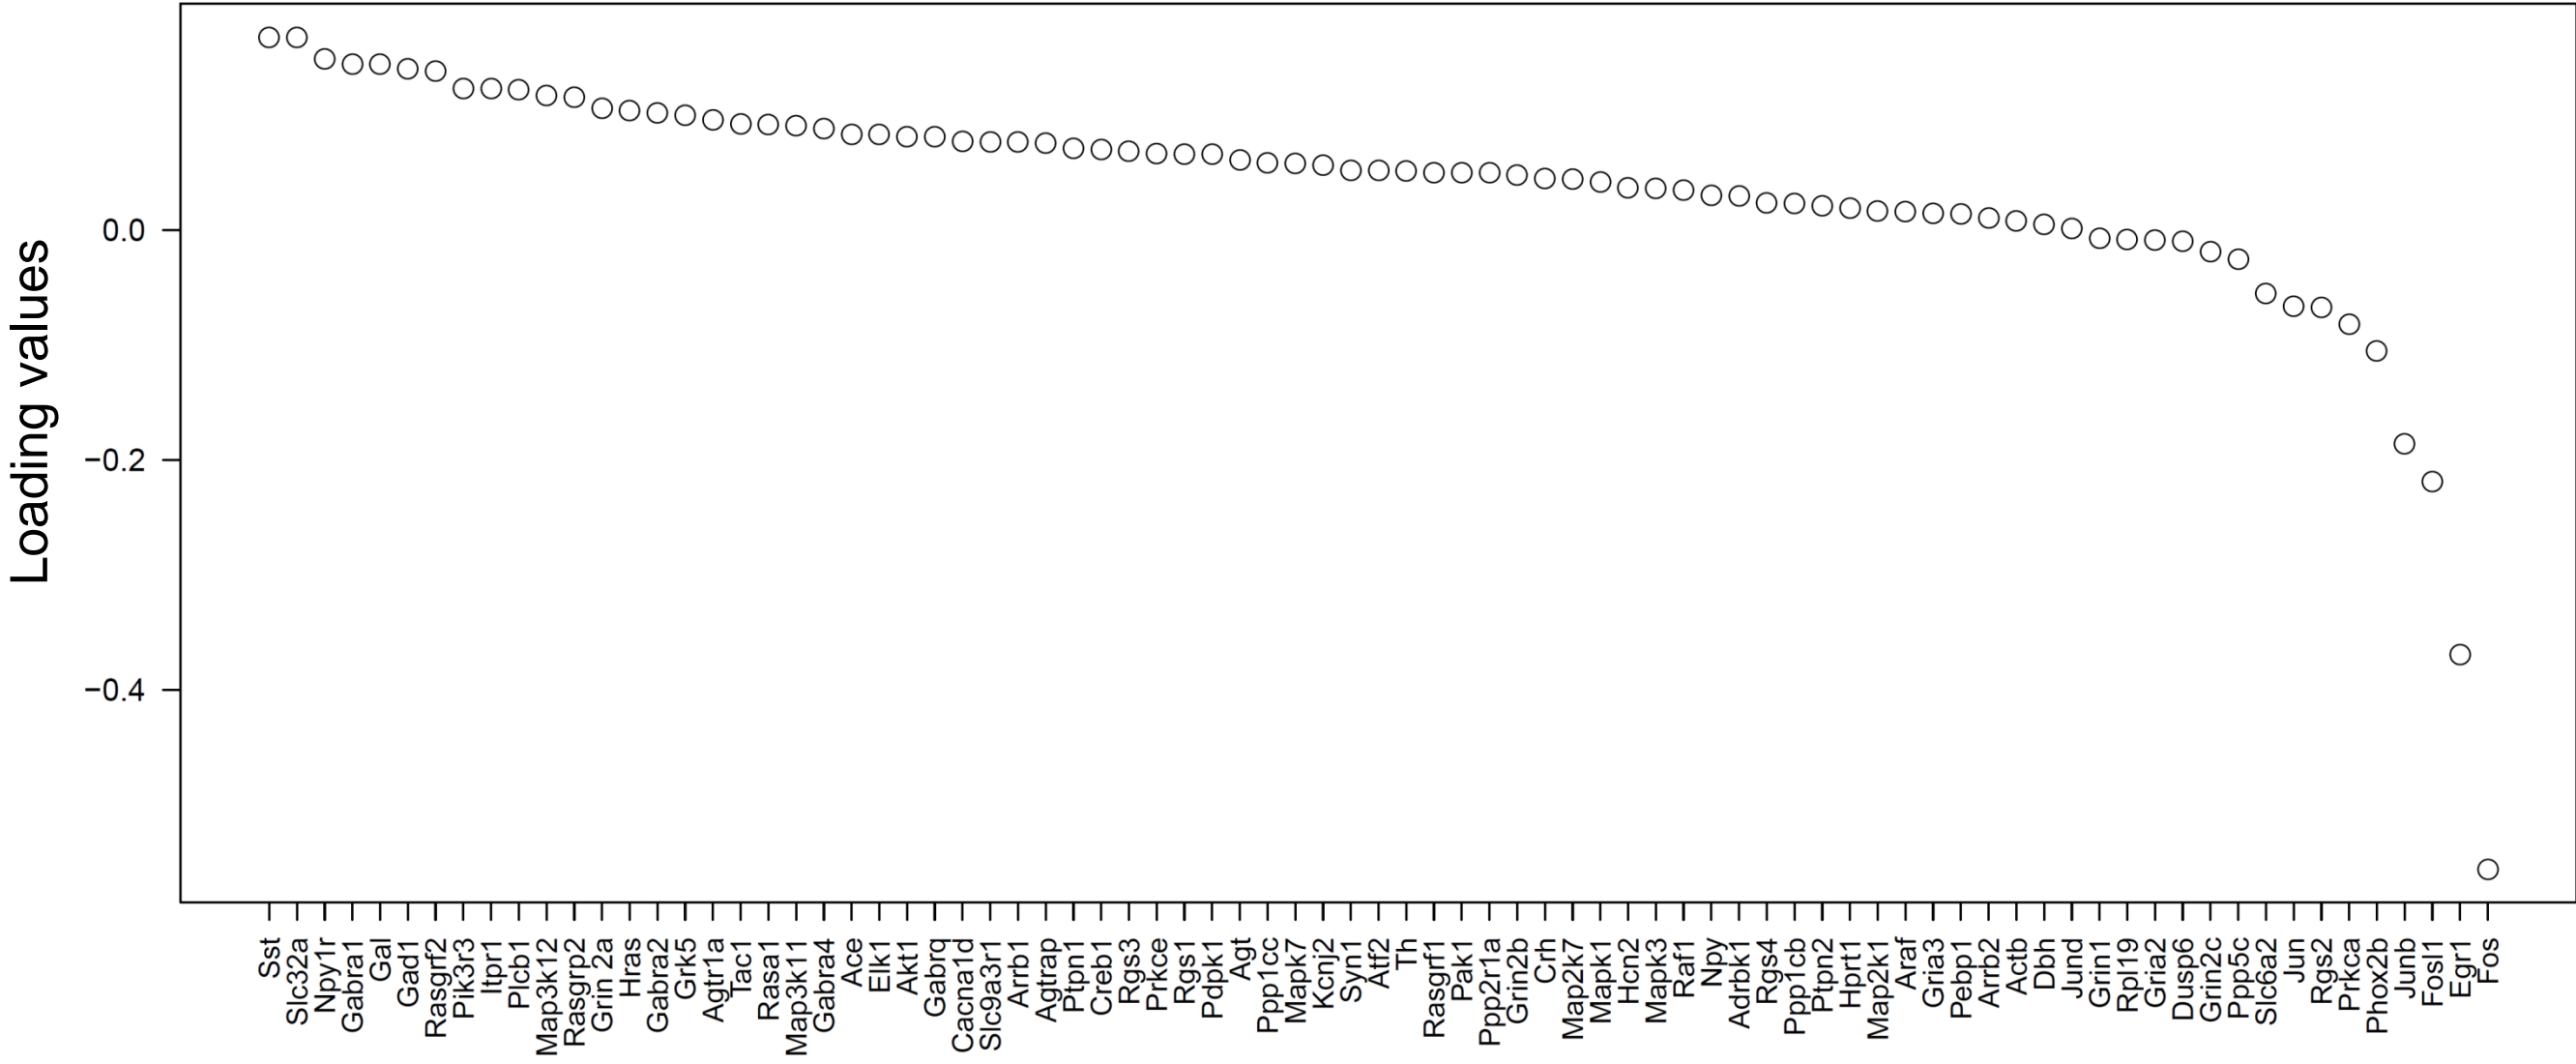

Figure S6

**A**

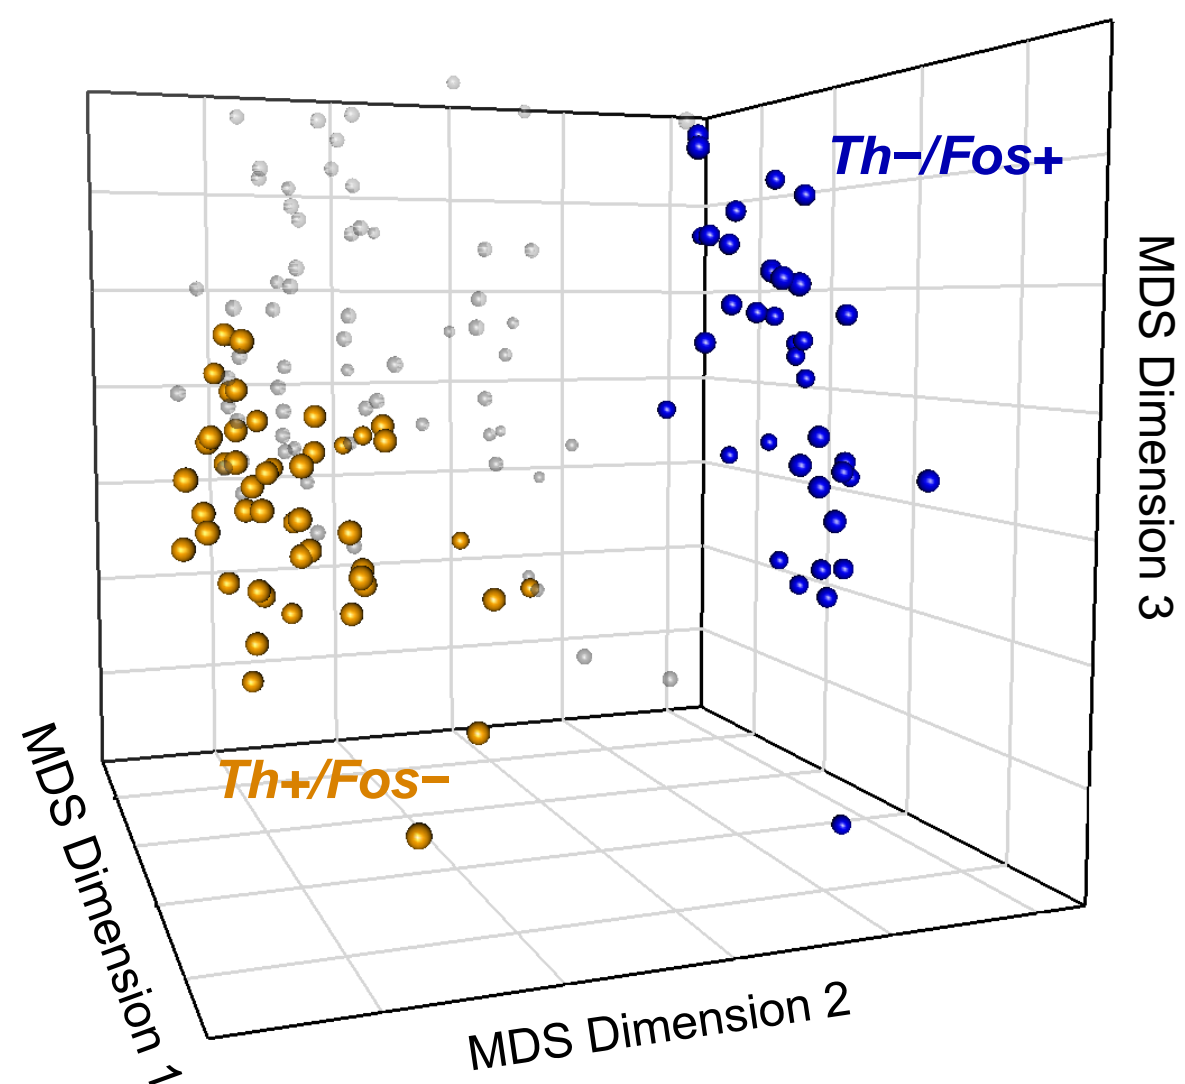

**B**

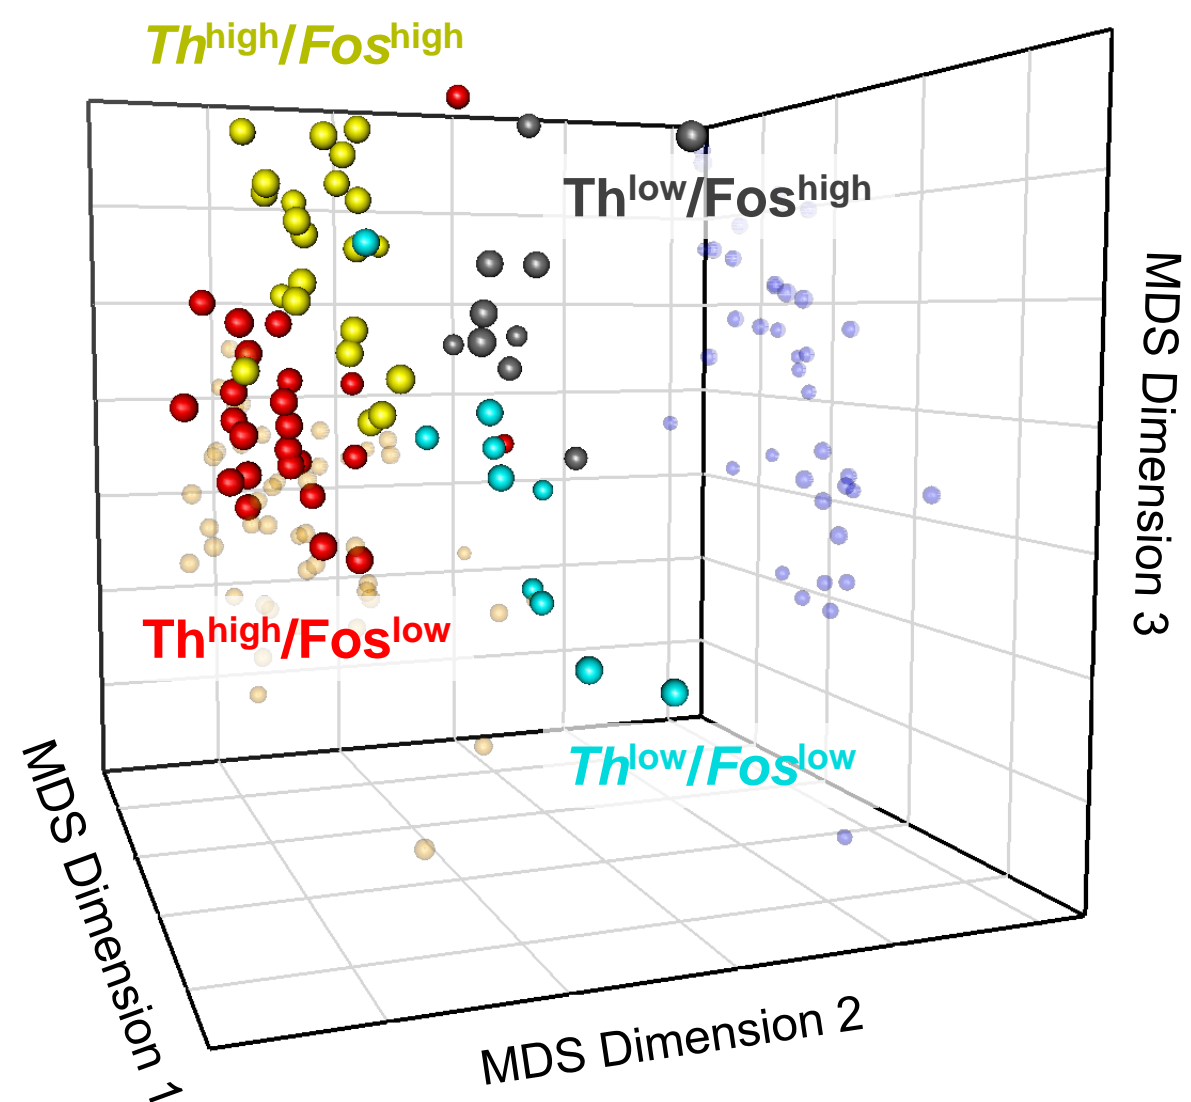

**C**

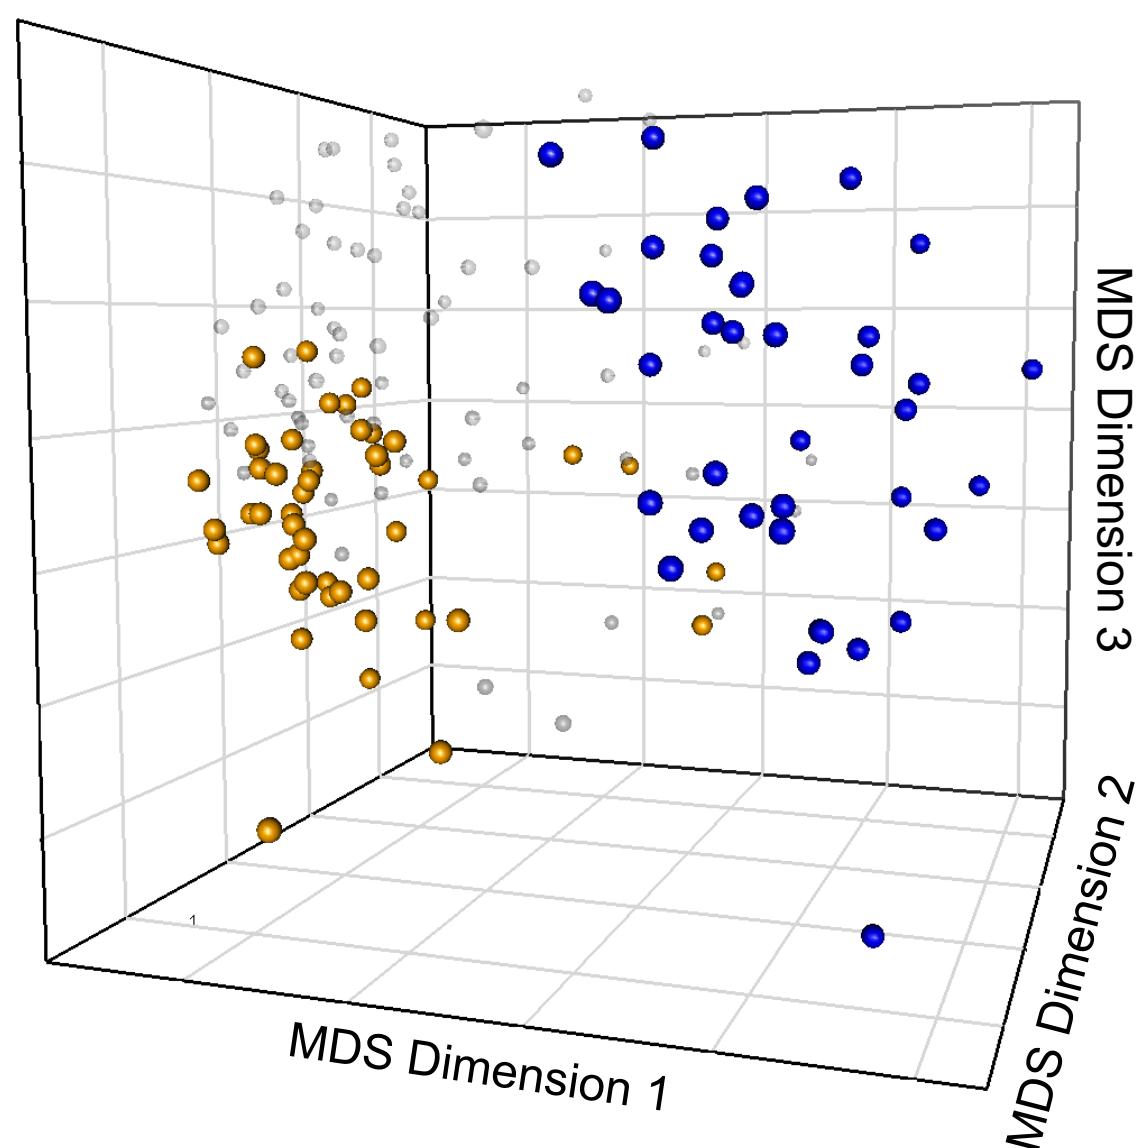

**D**

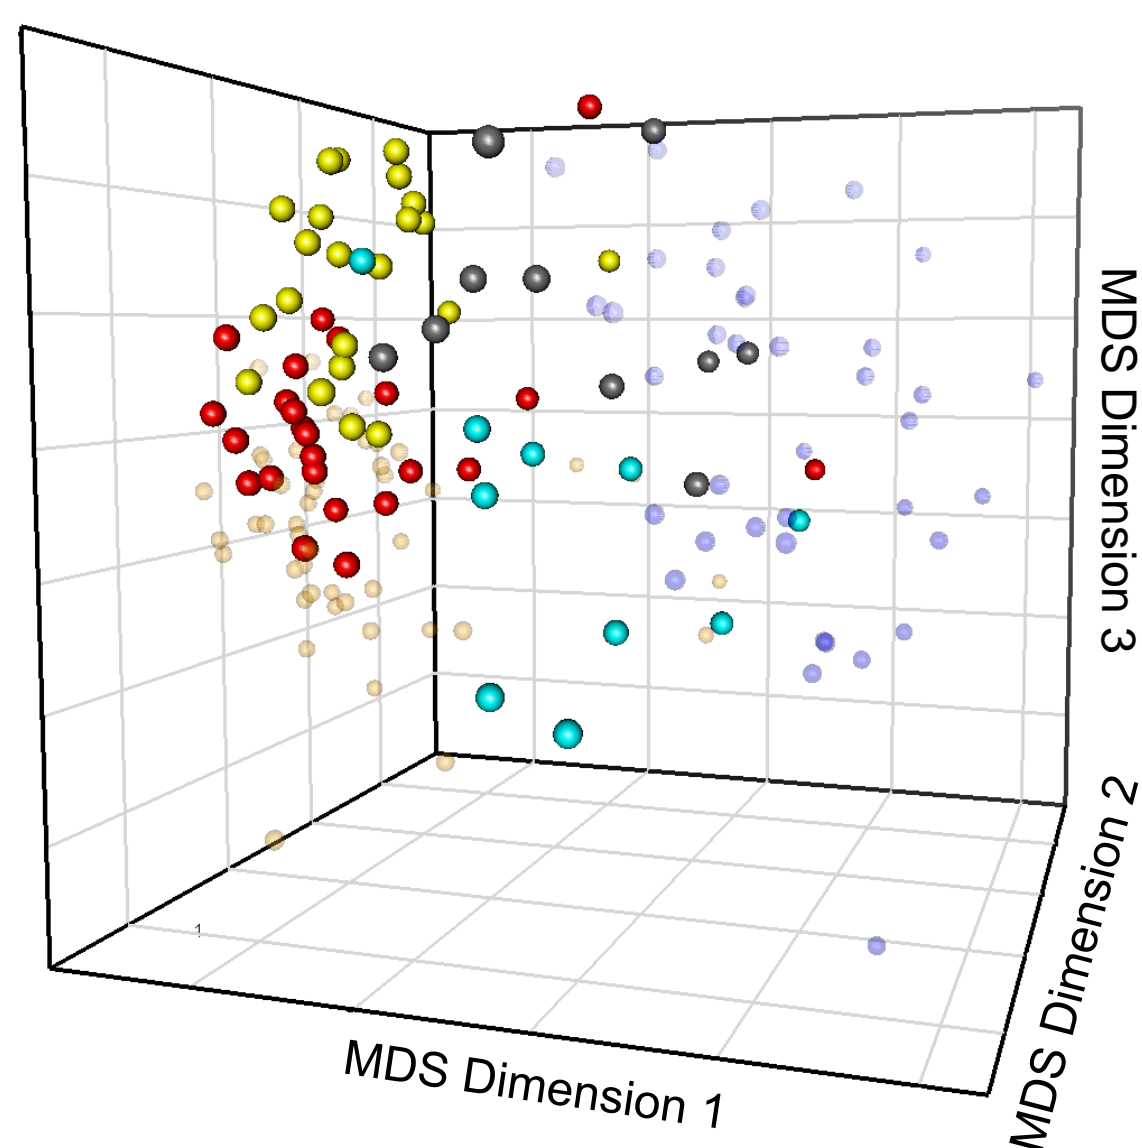

**E**

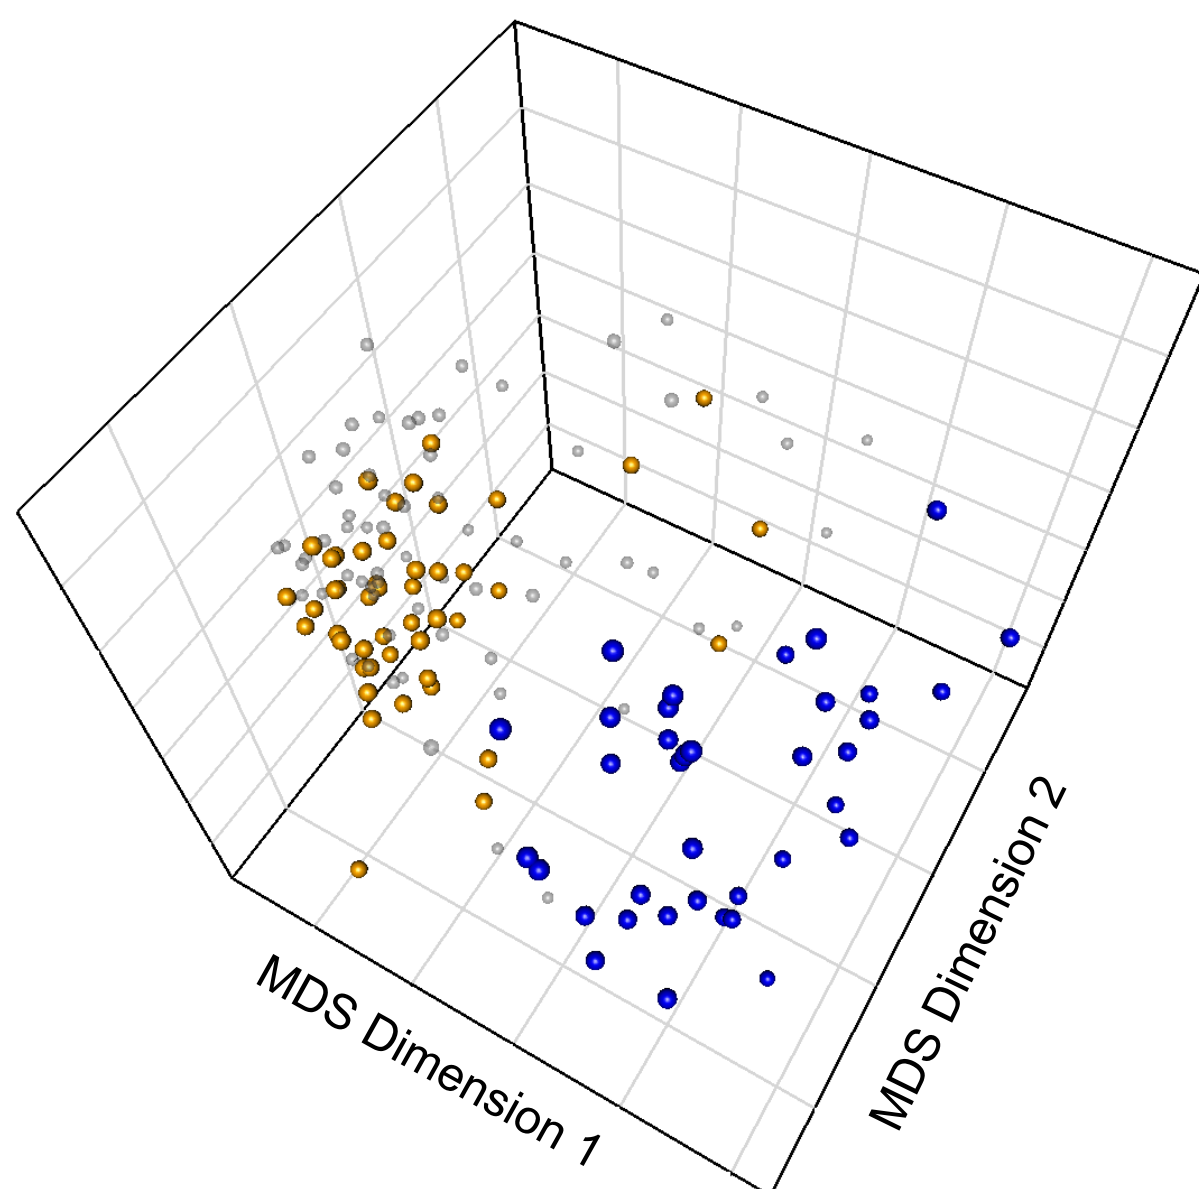

**F**

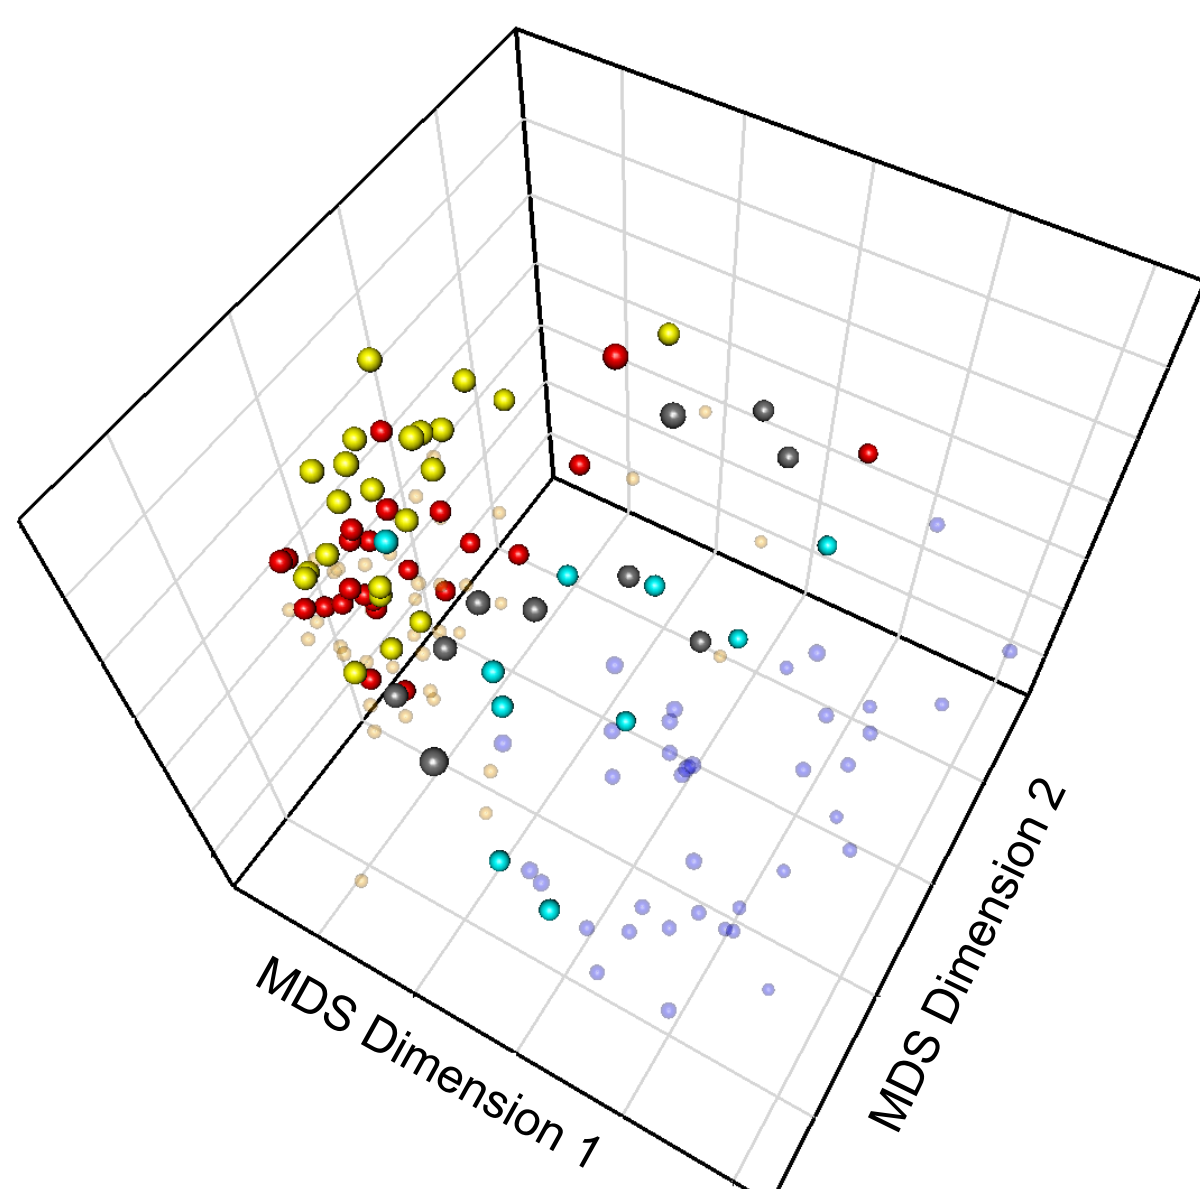



Figure S7

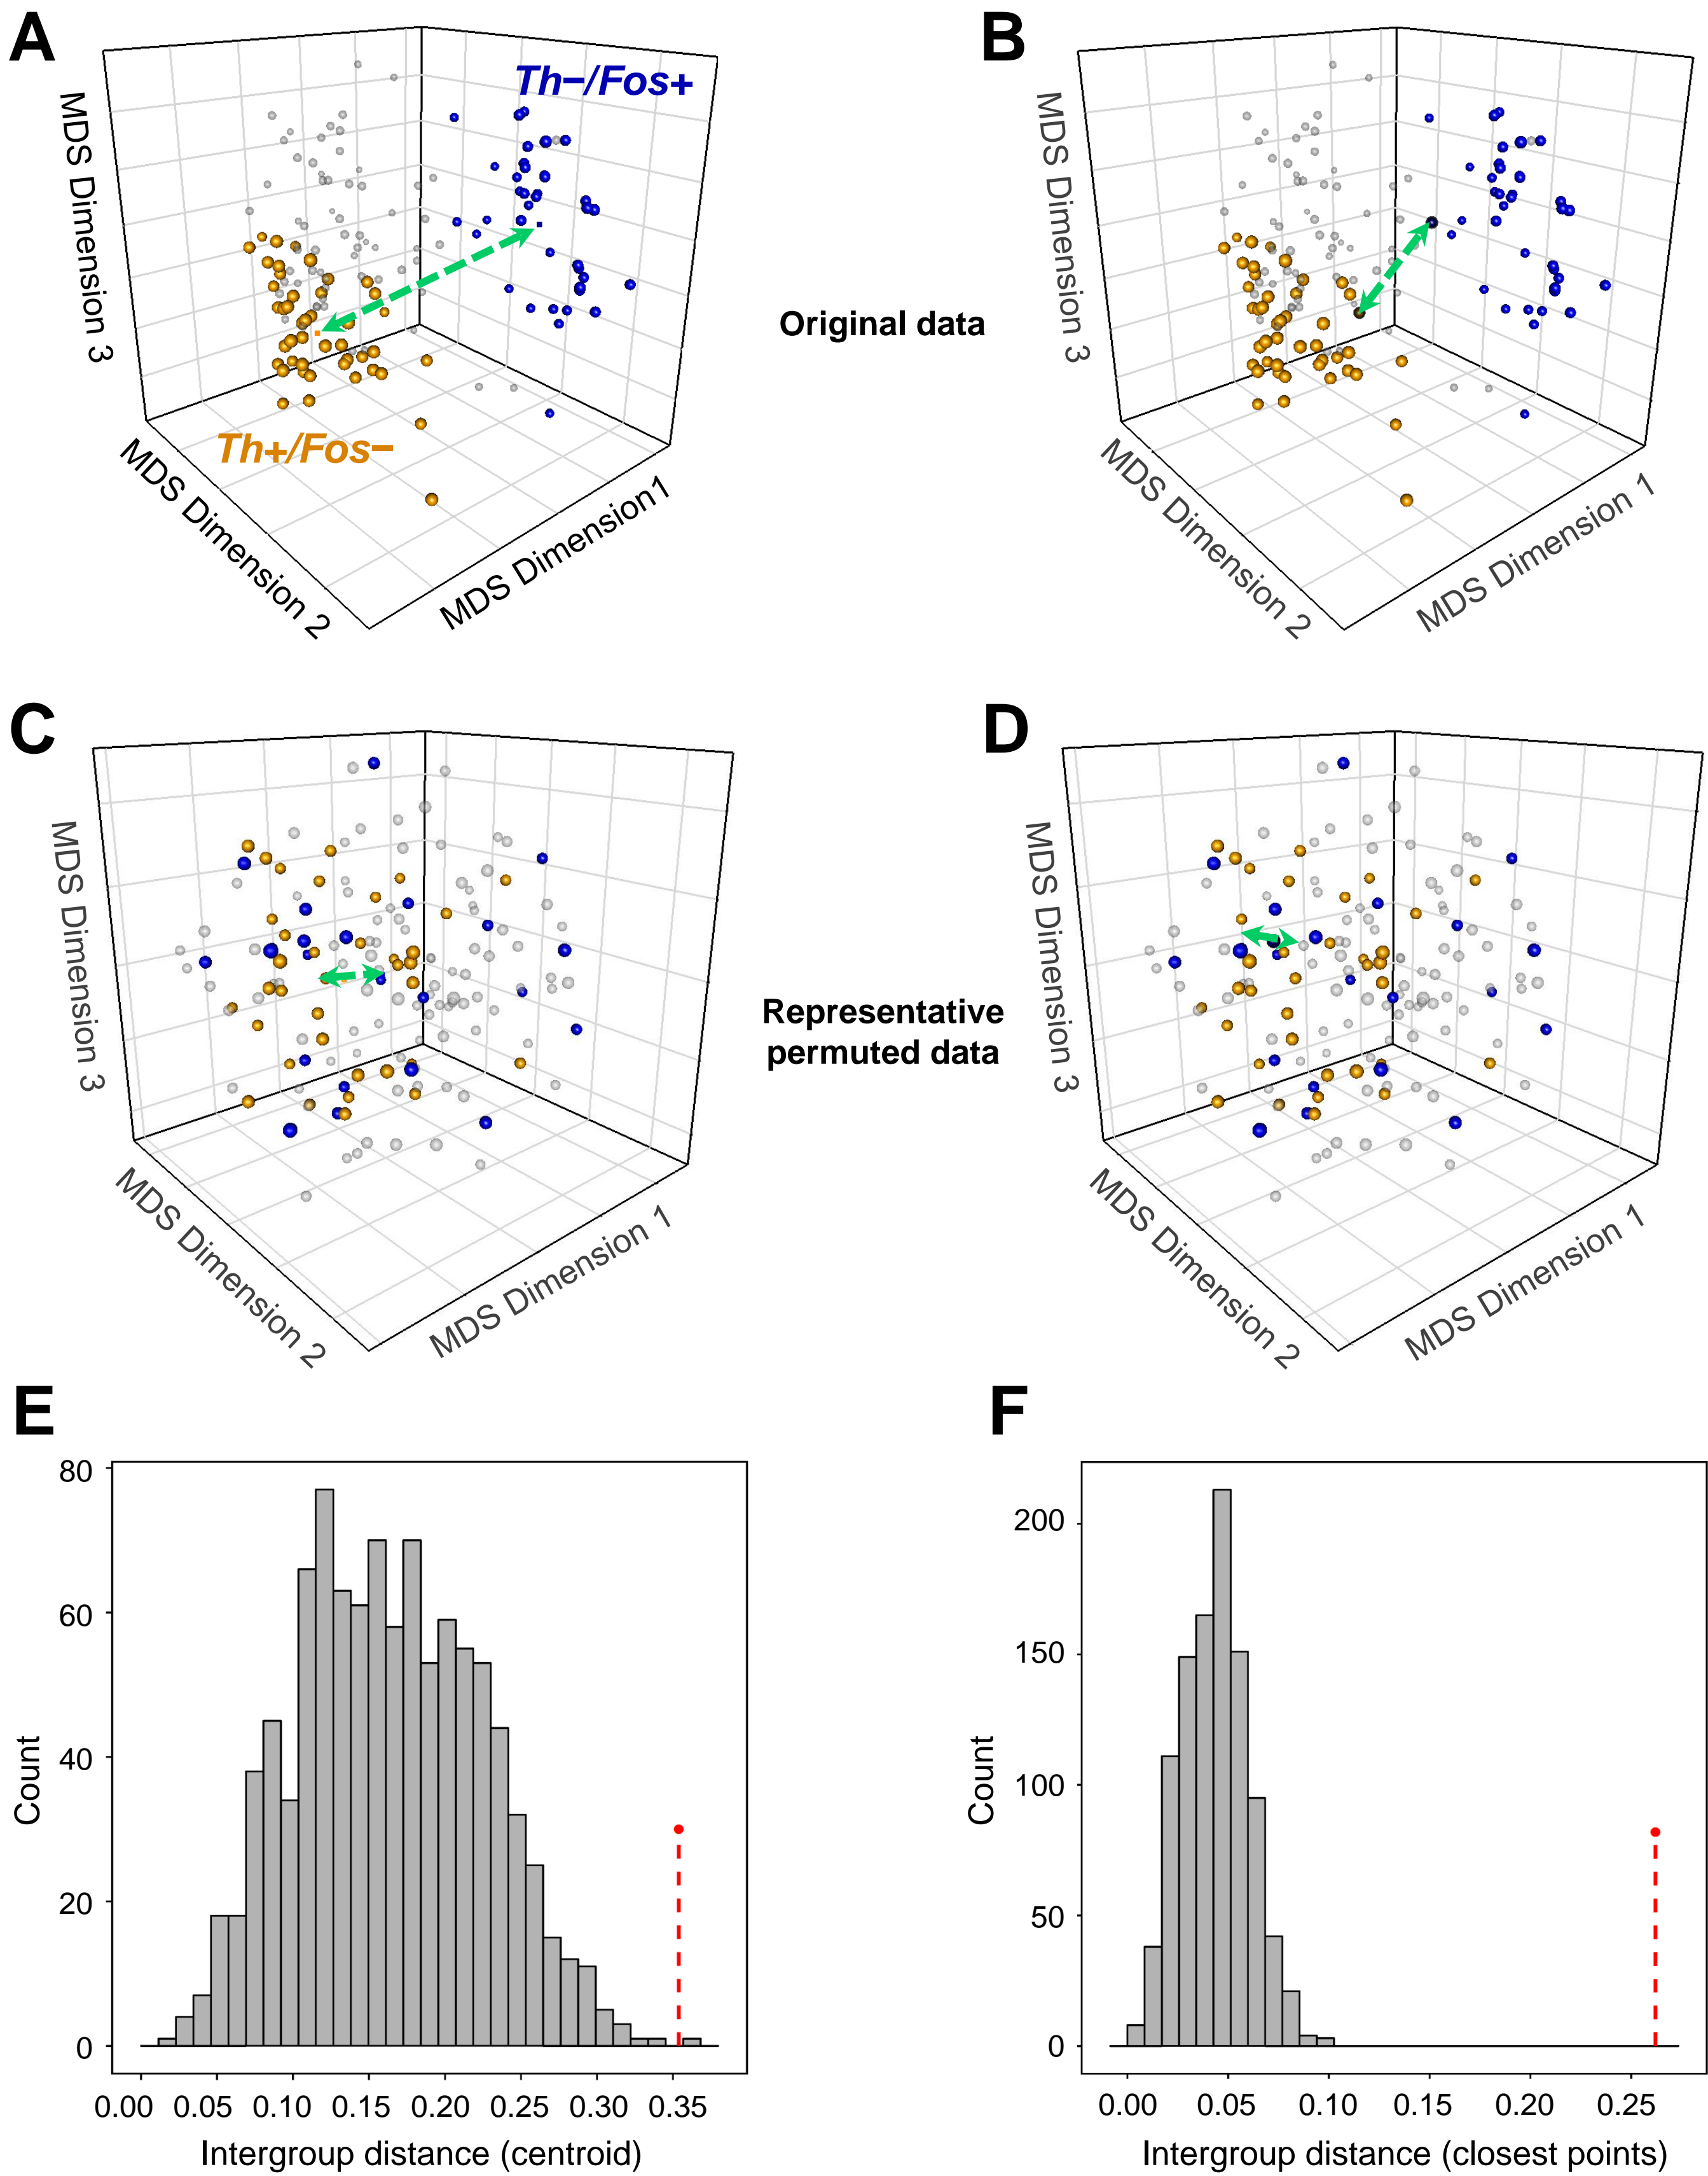

Figure S8

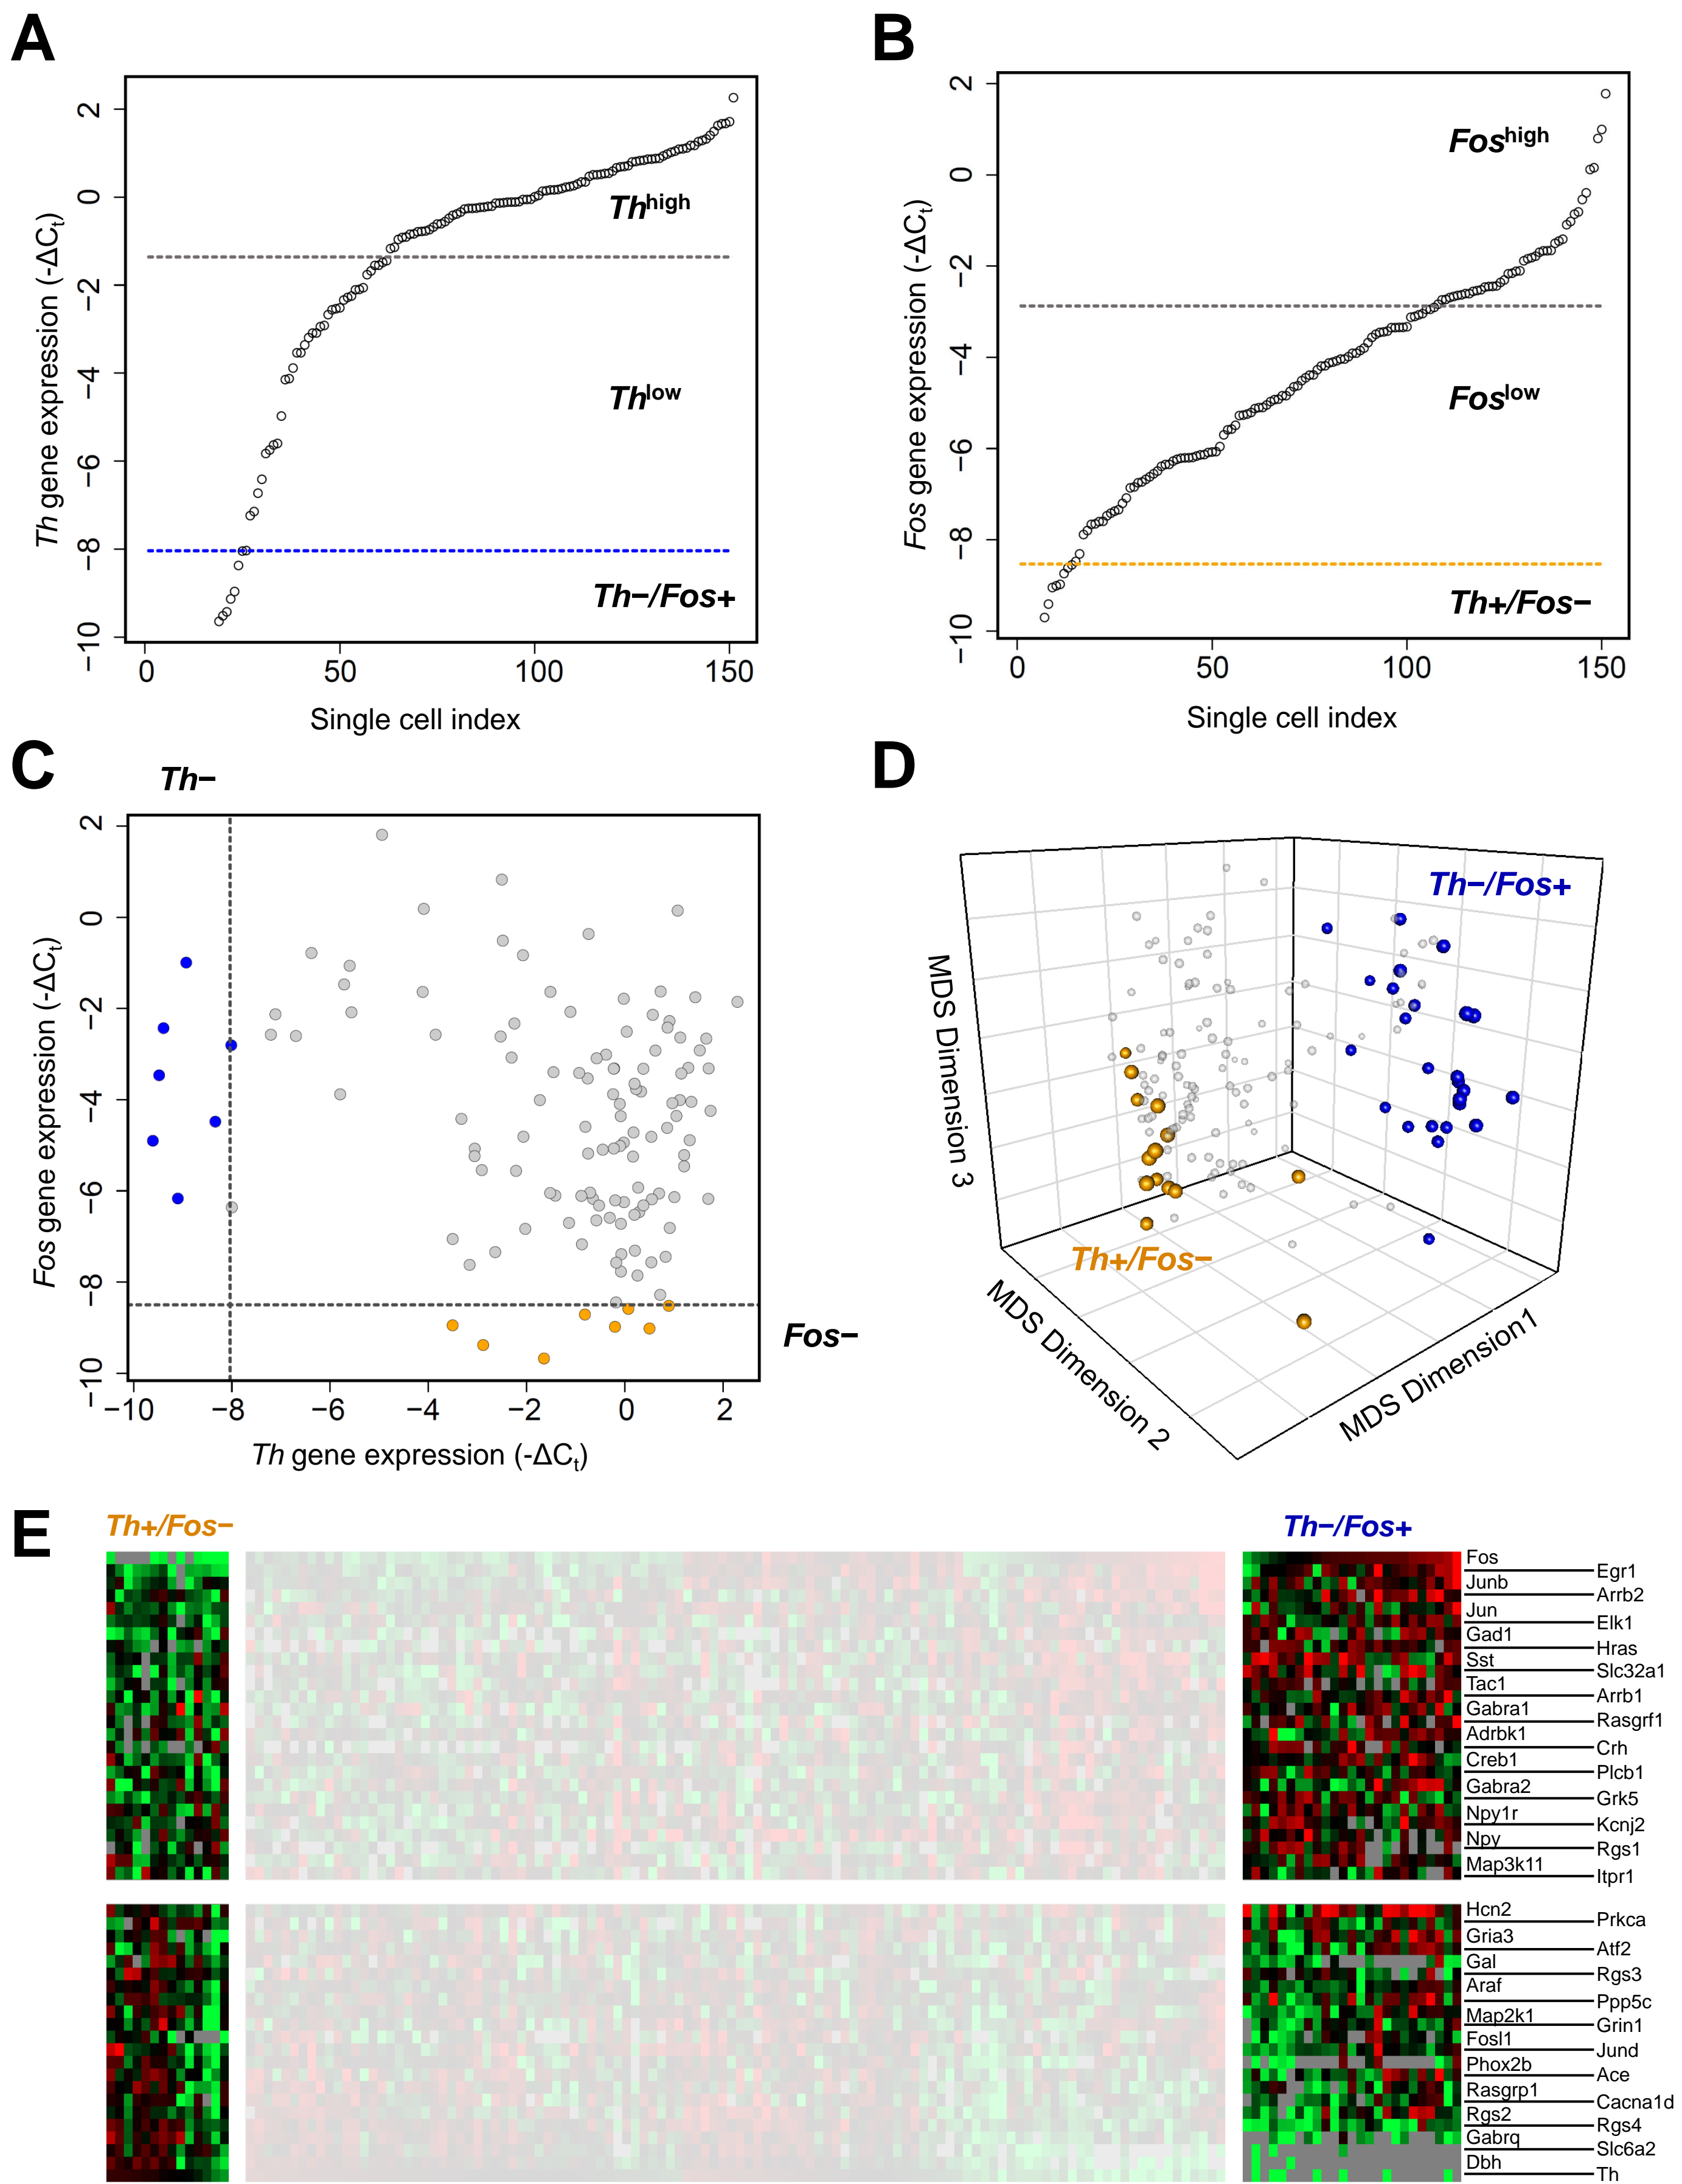

Figure S9

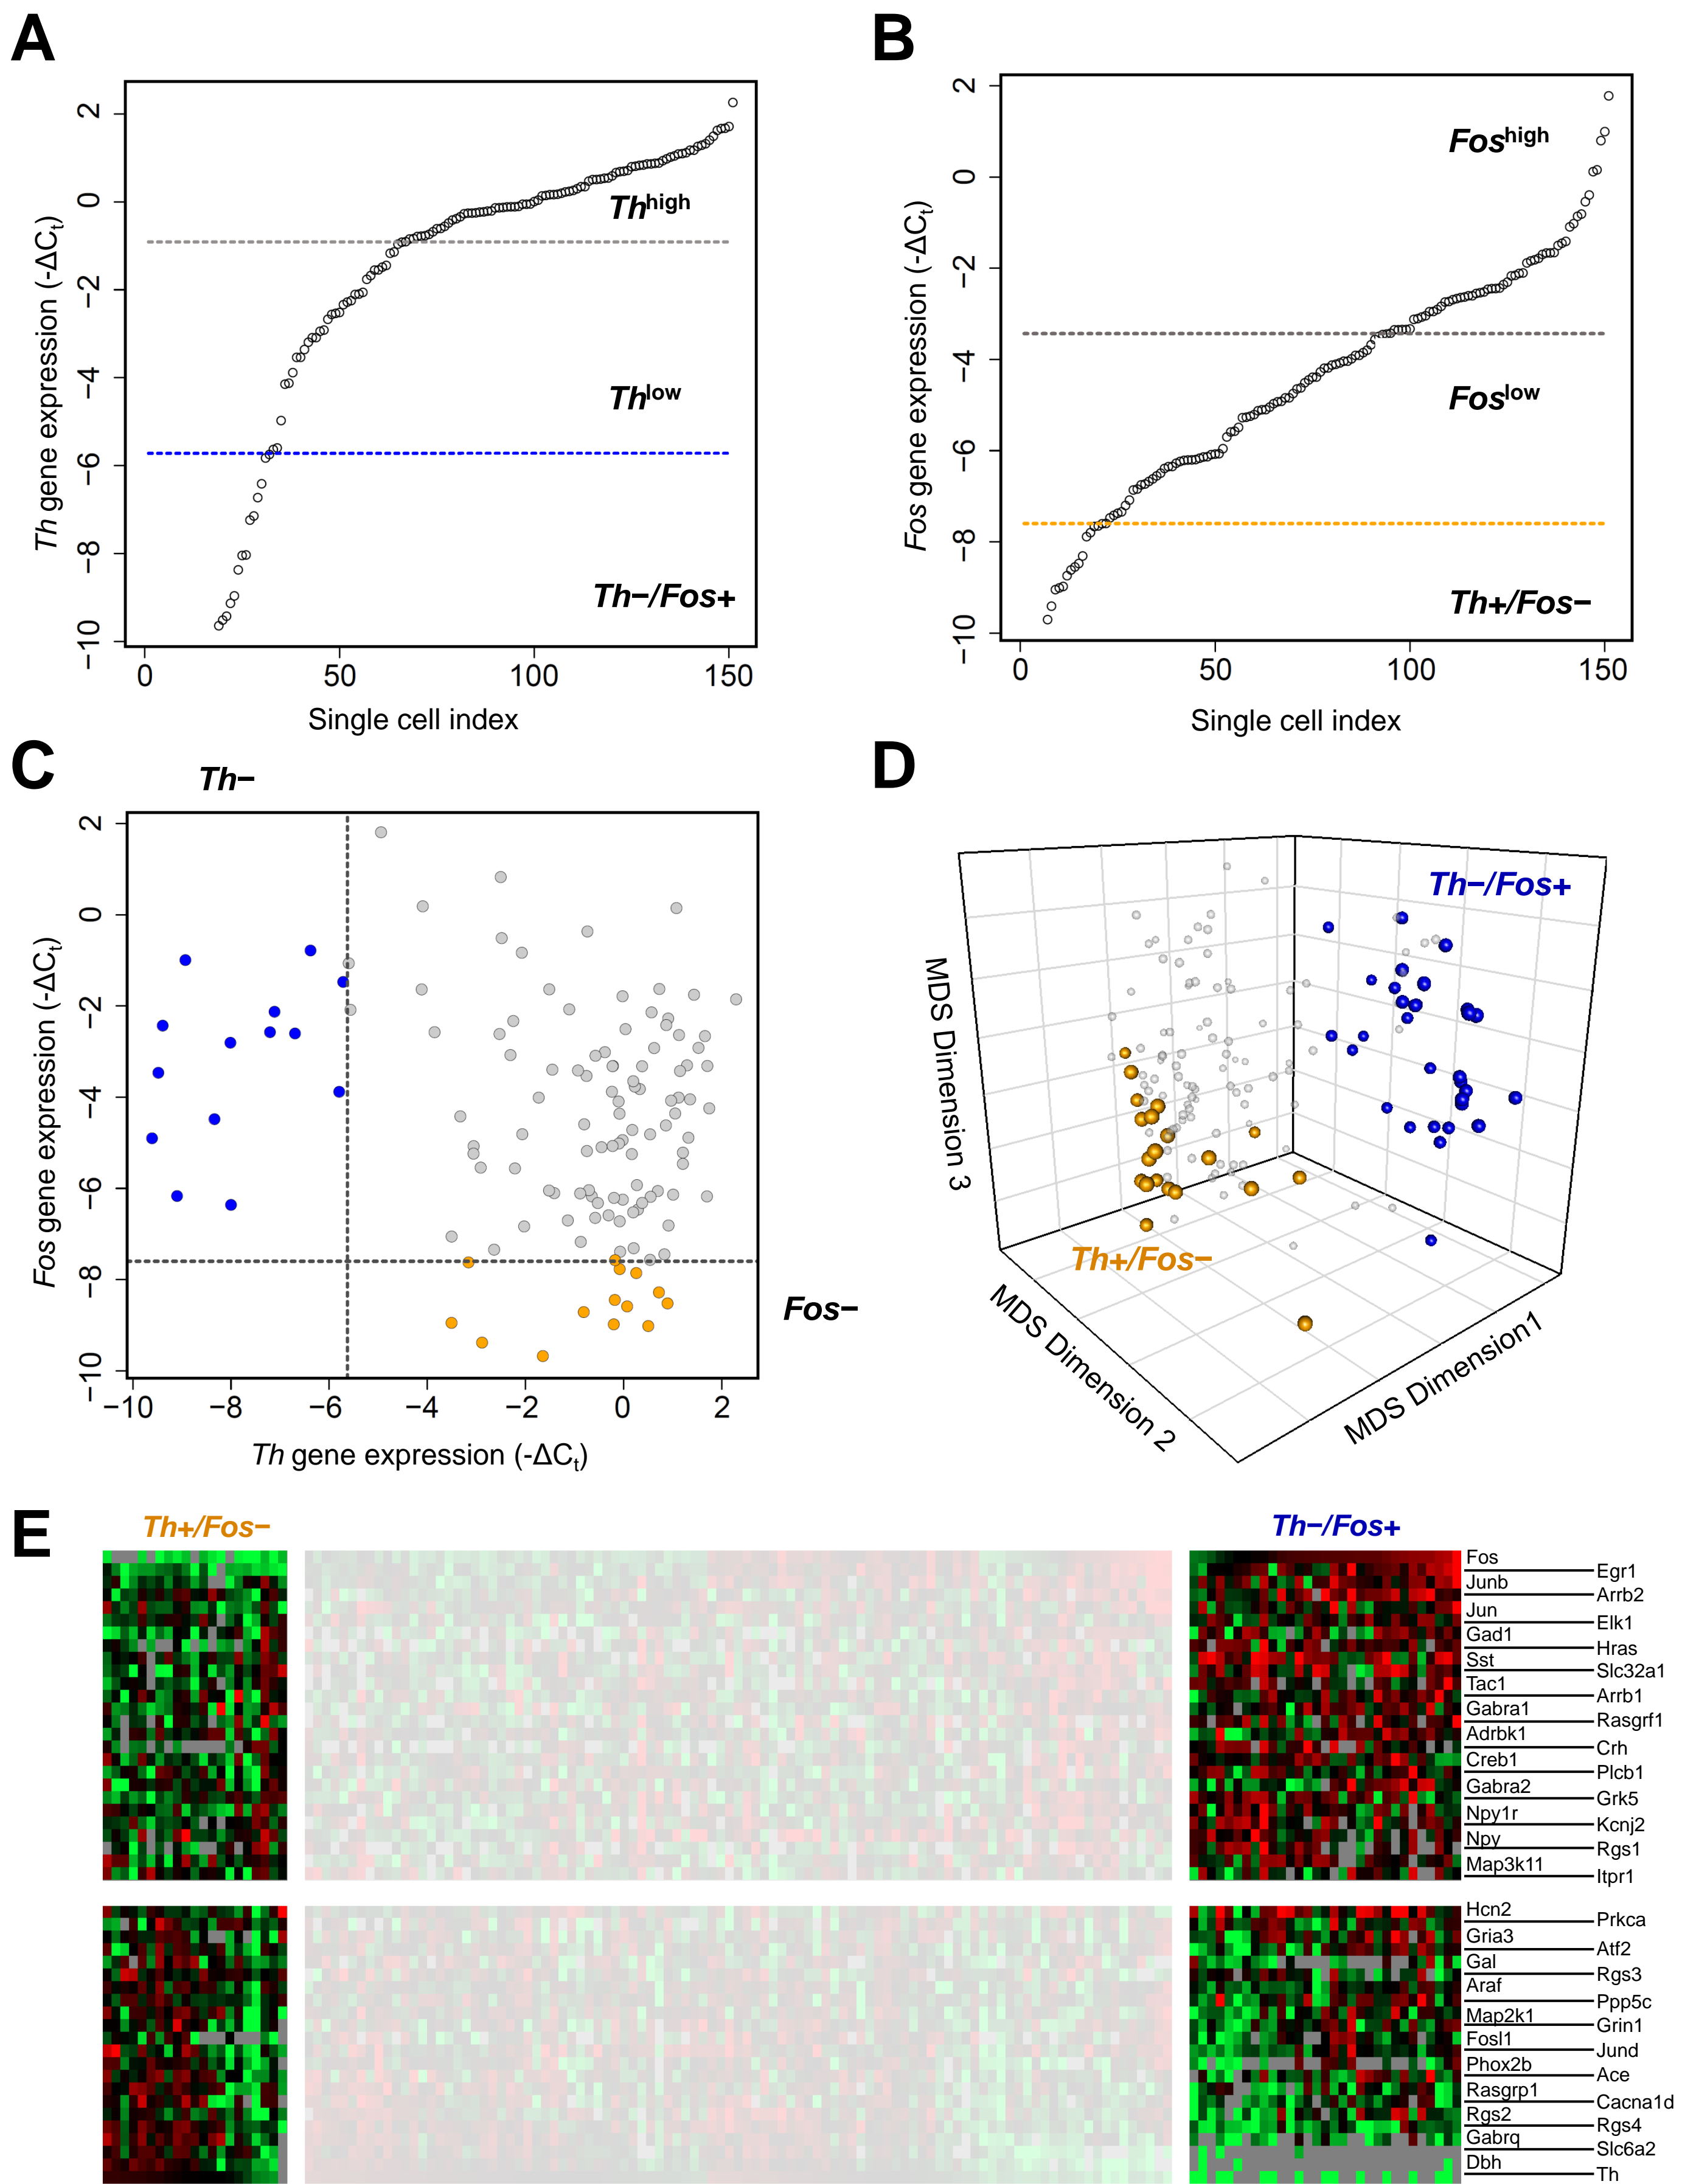



Figure S10

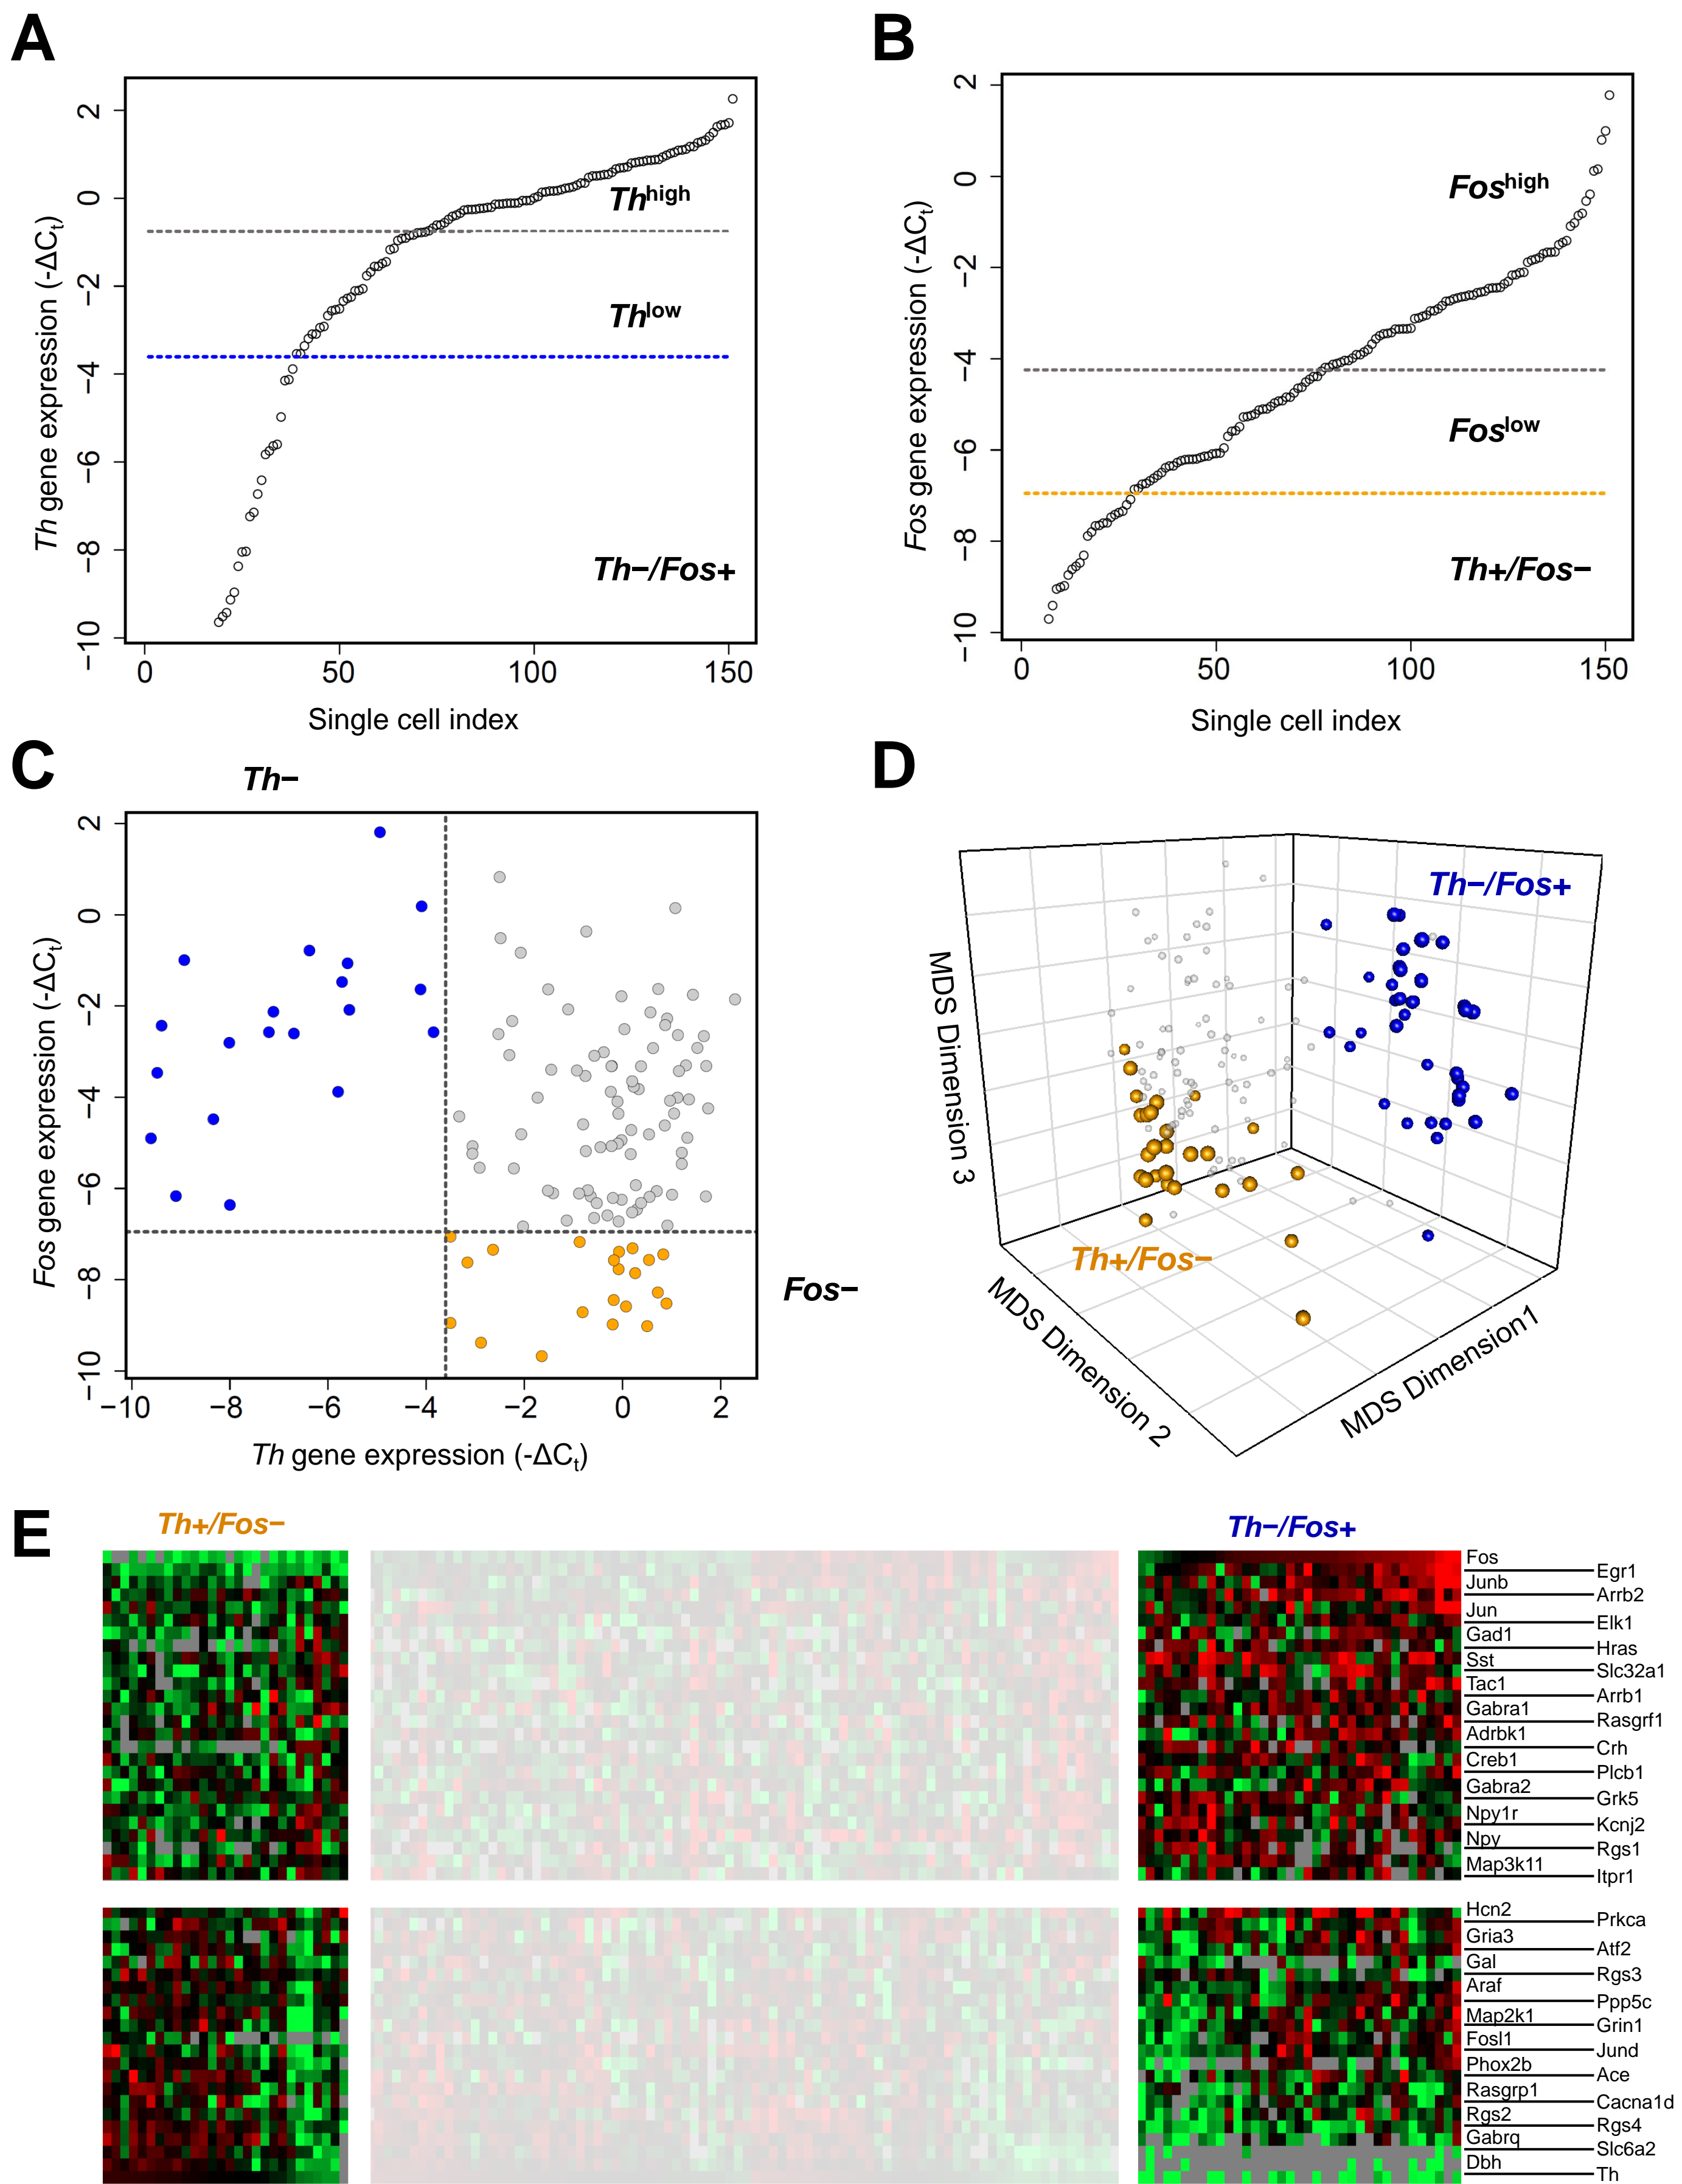



Figure S11

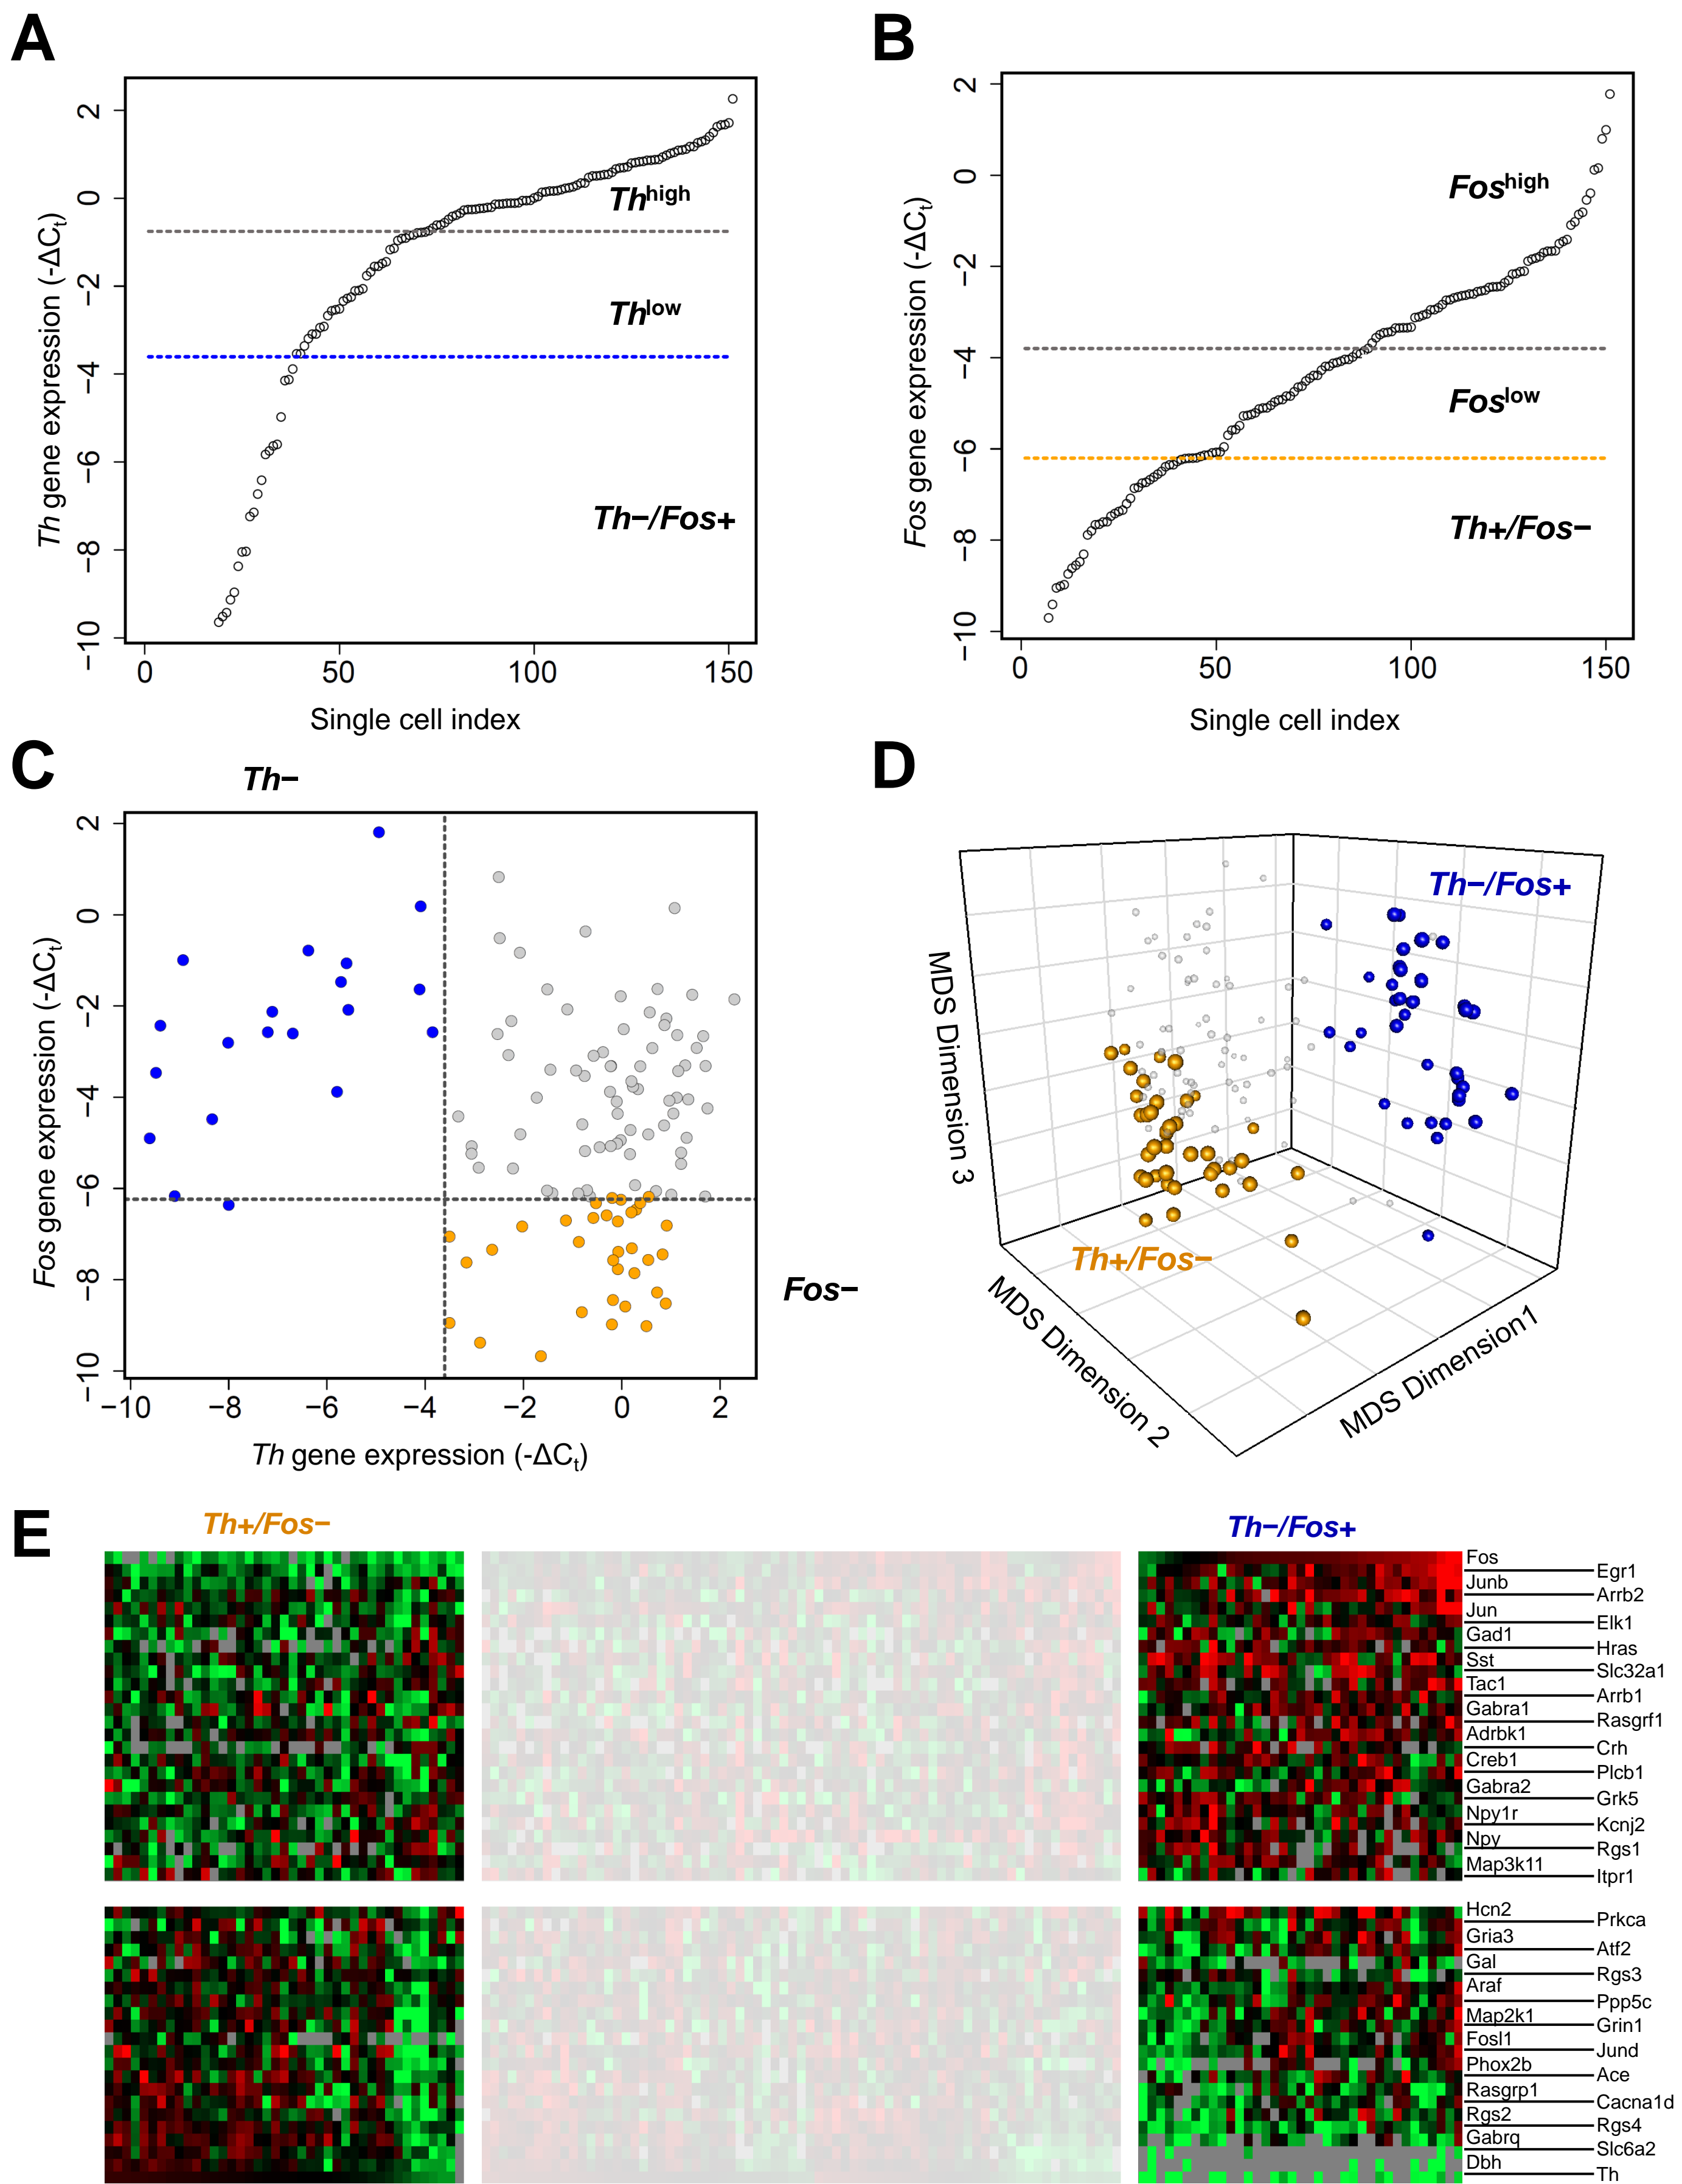

Figure S12

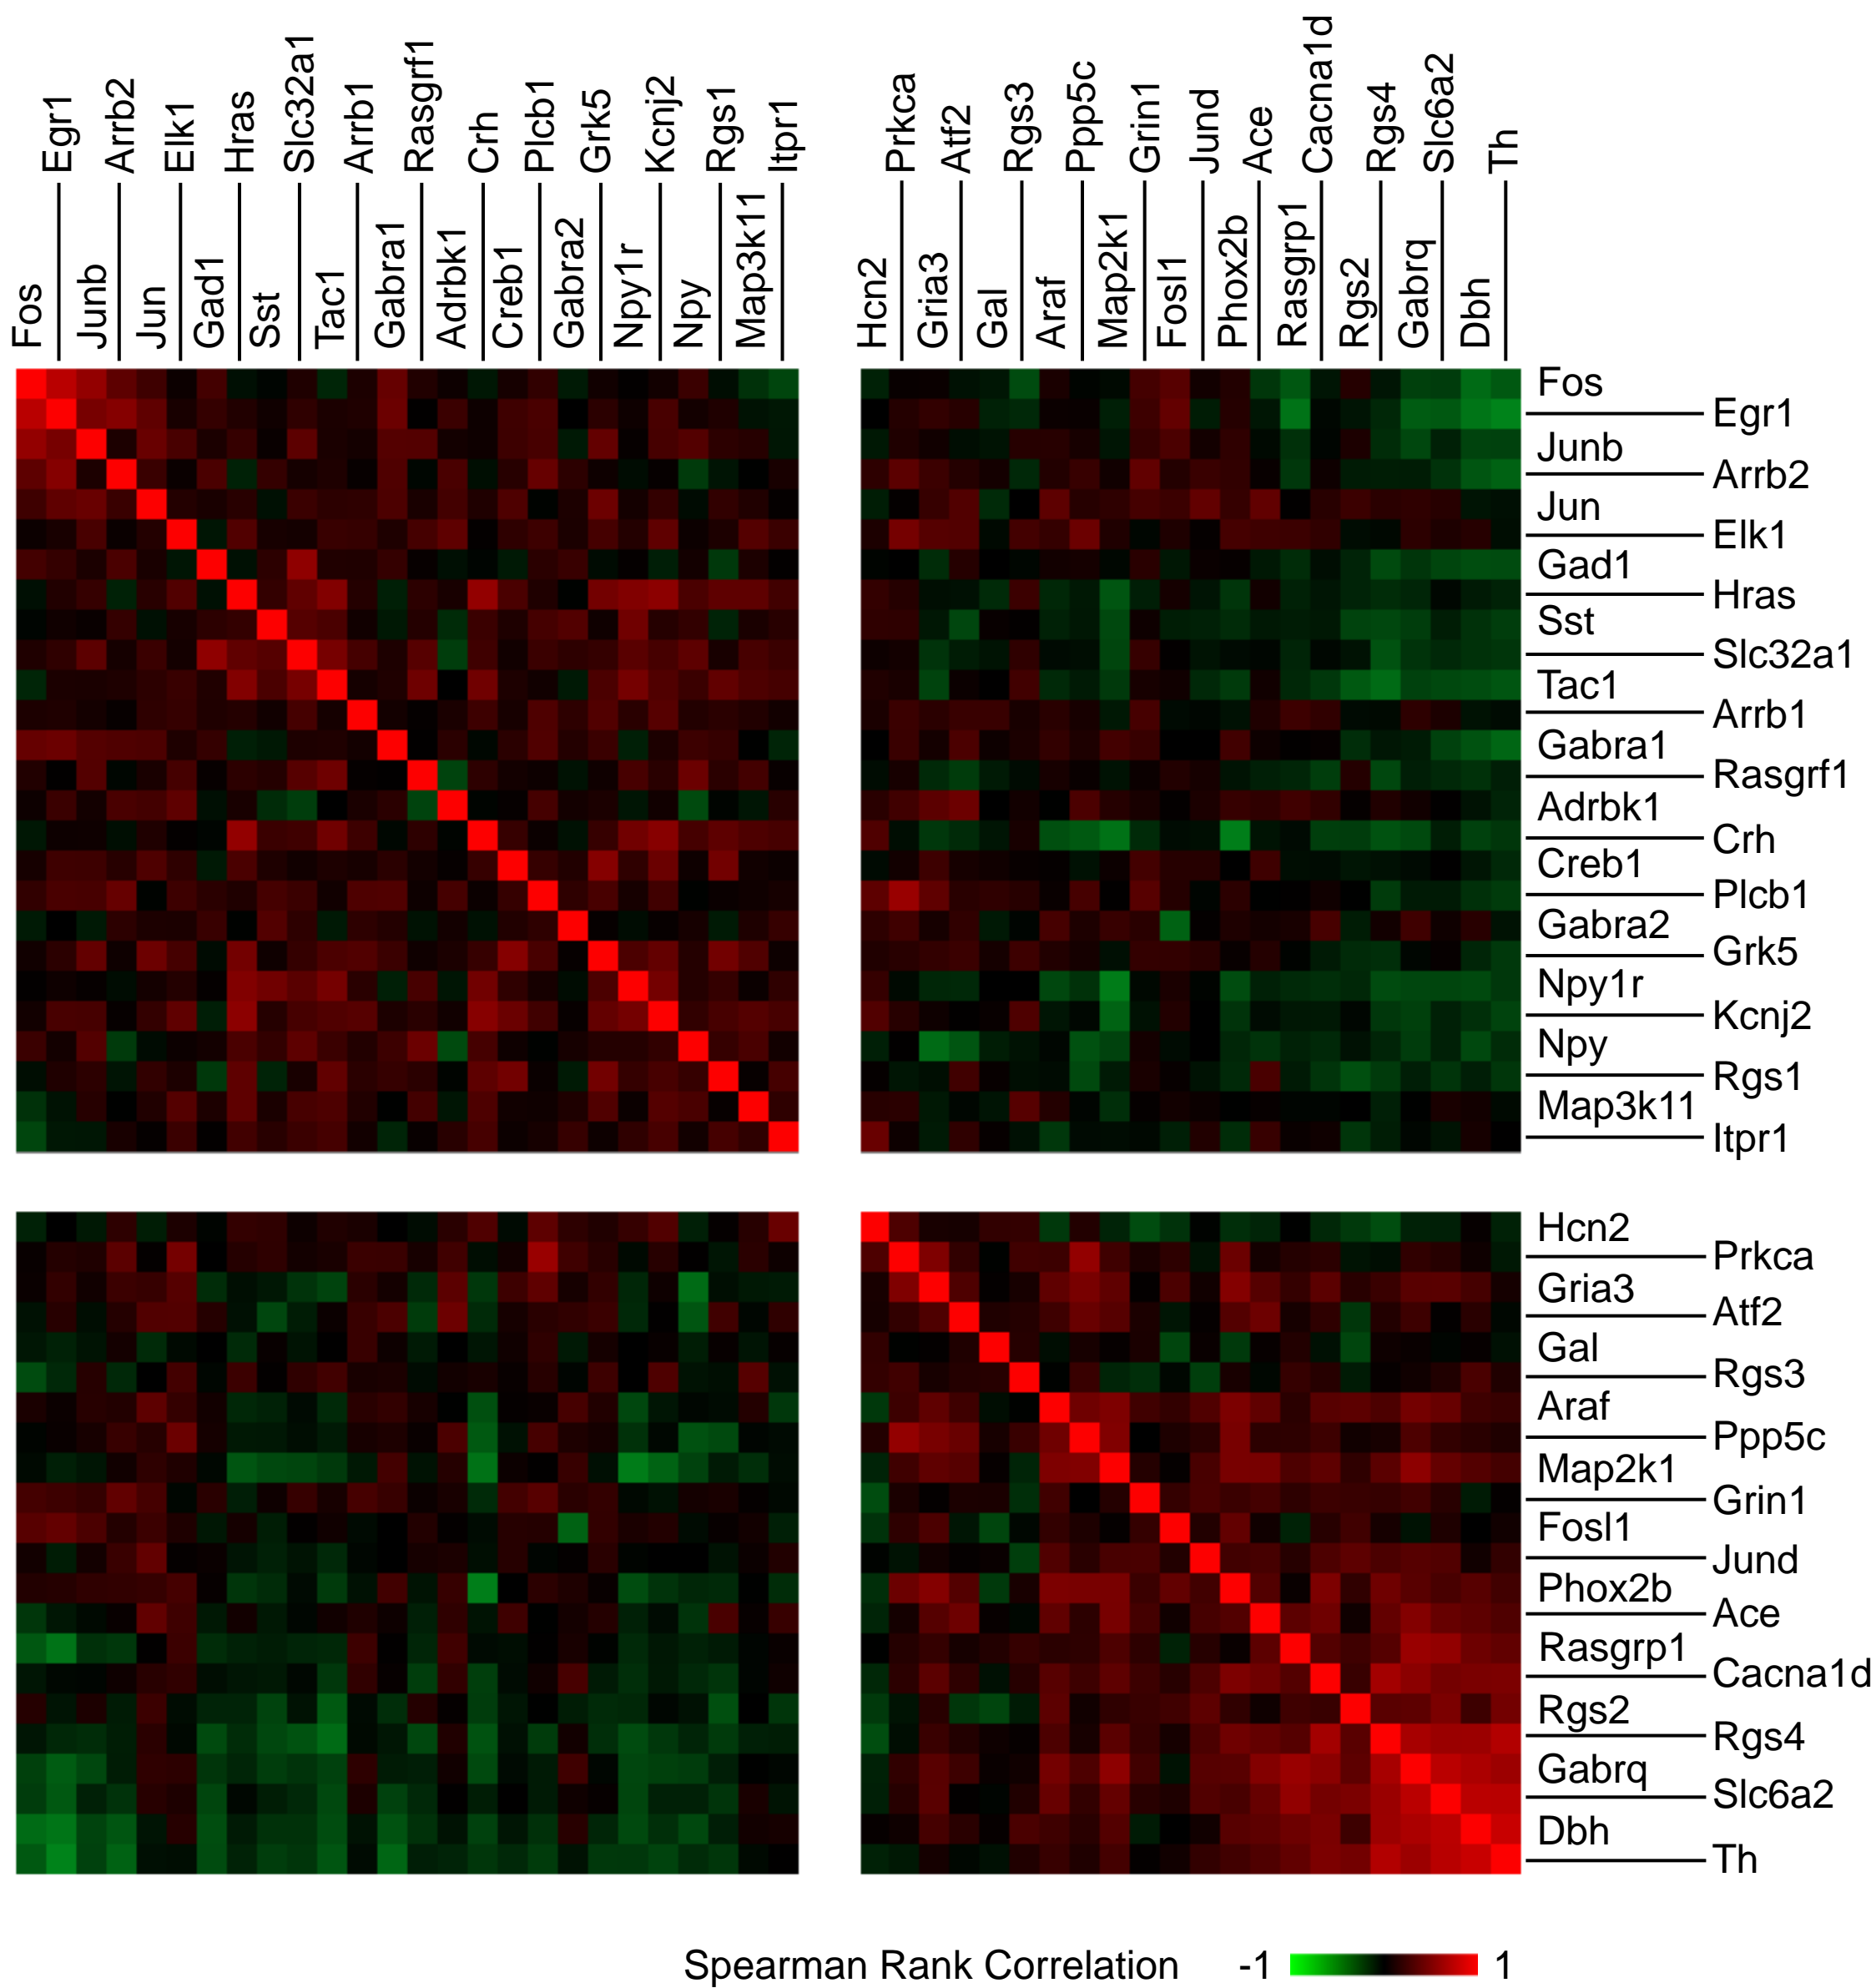

Figure S13

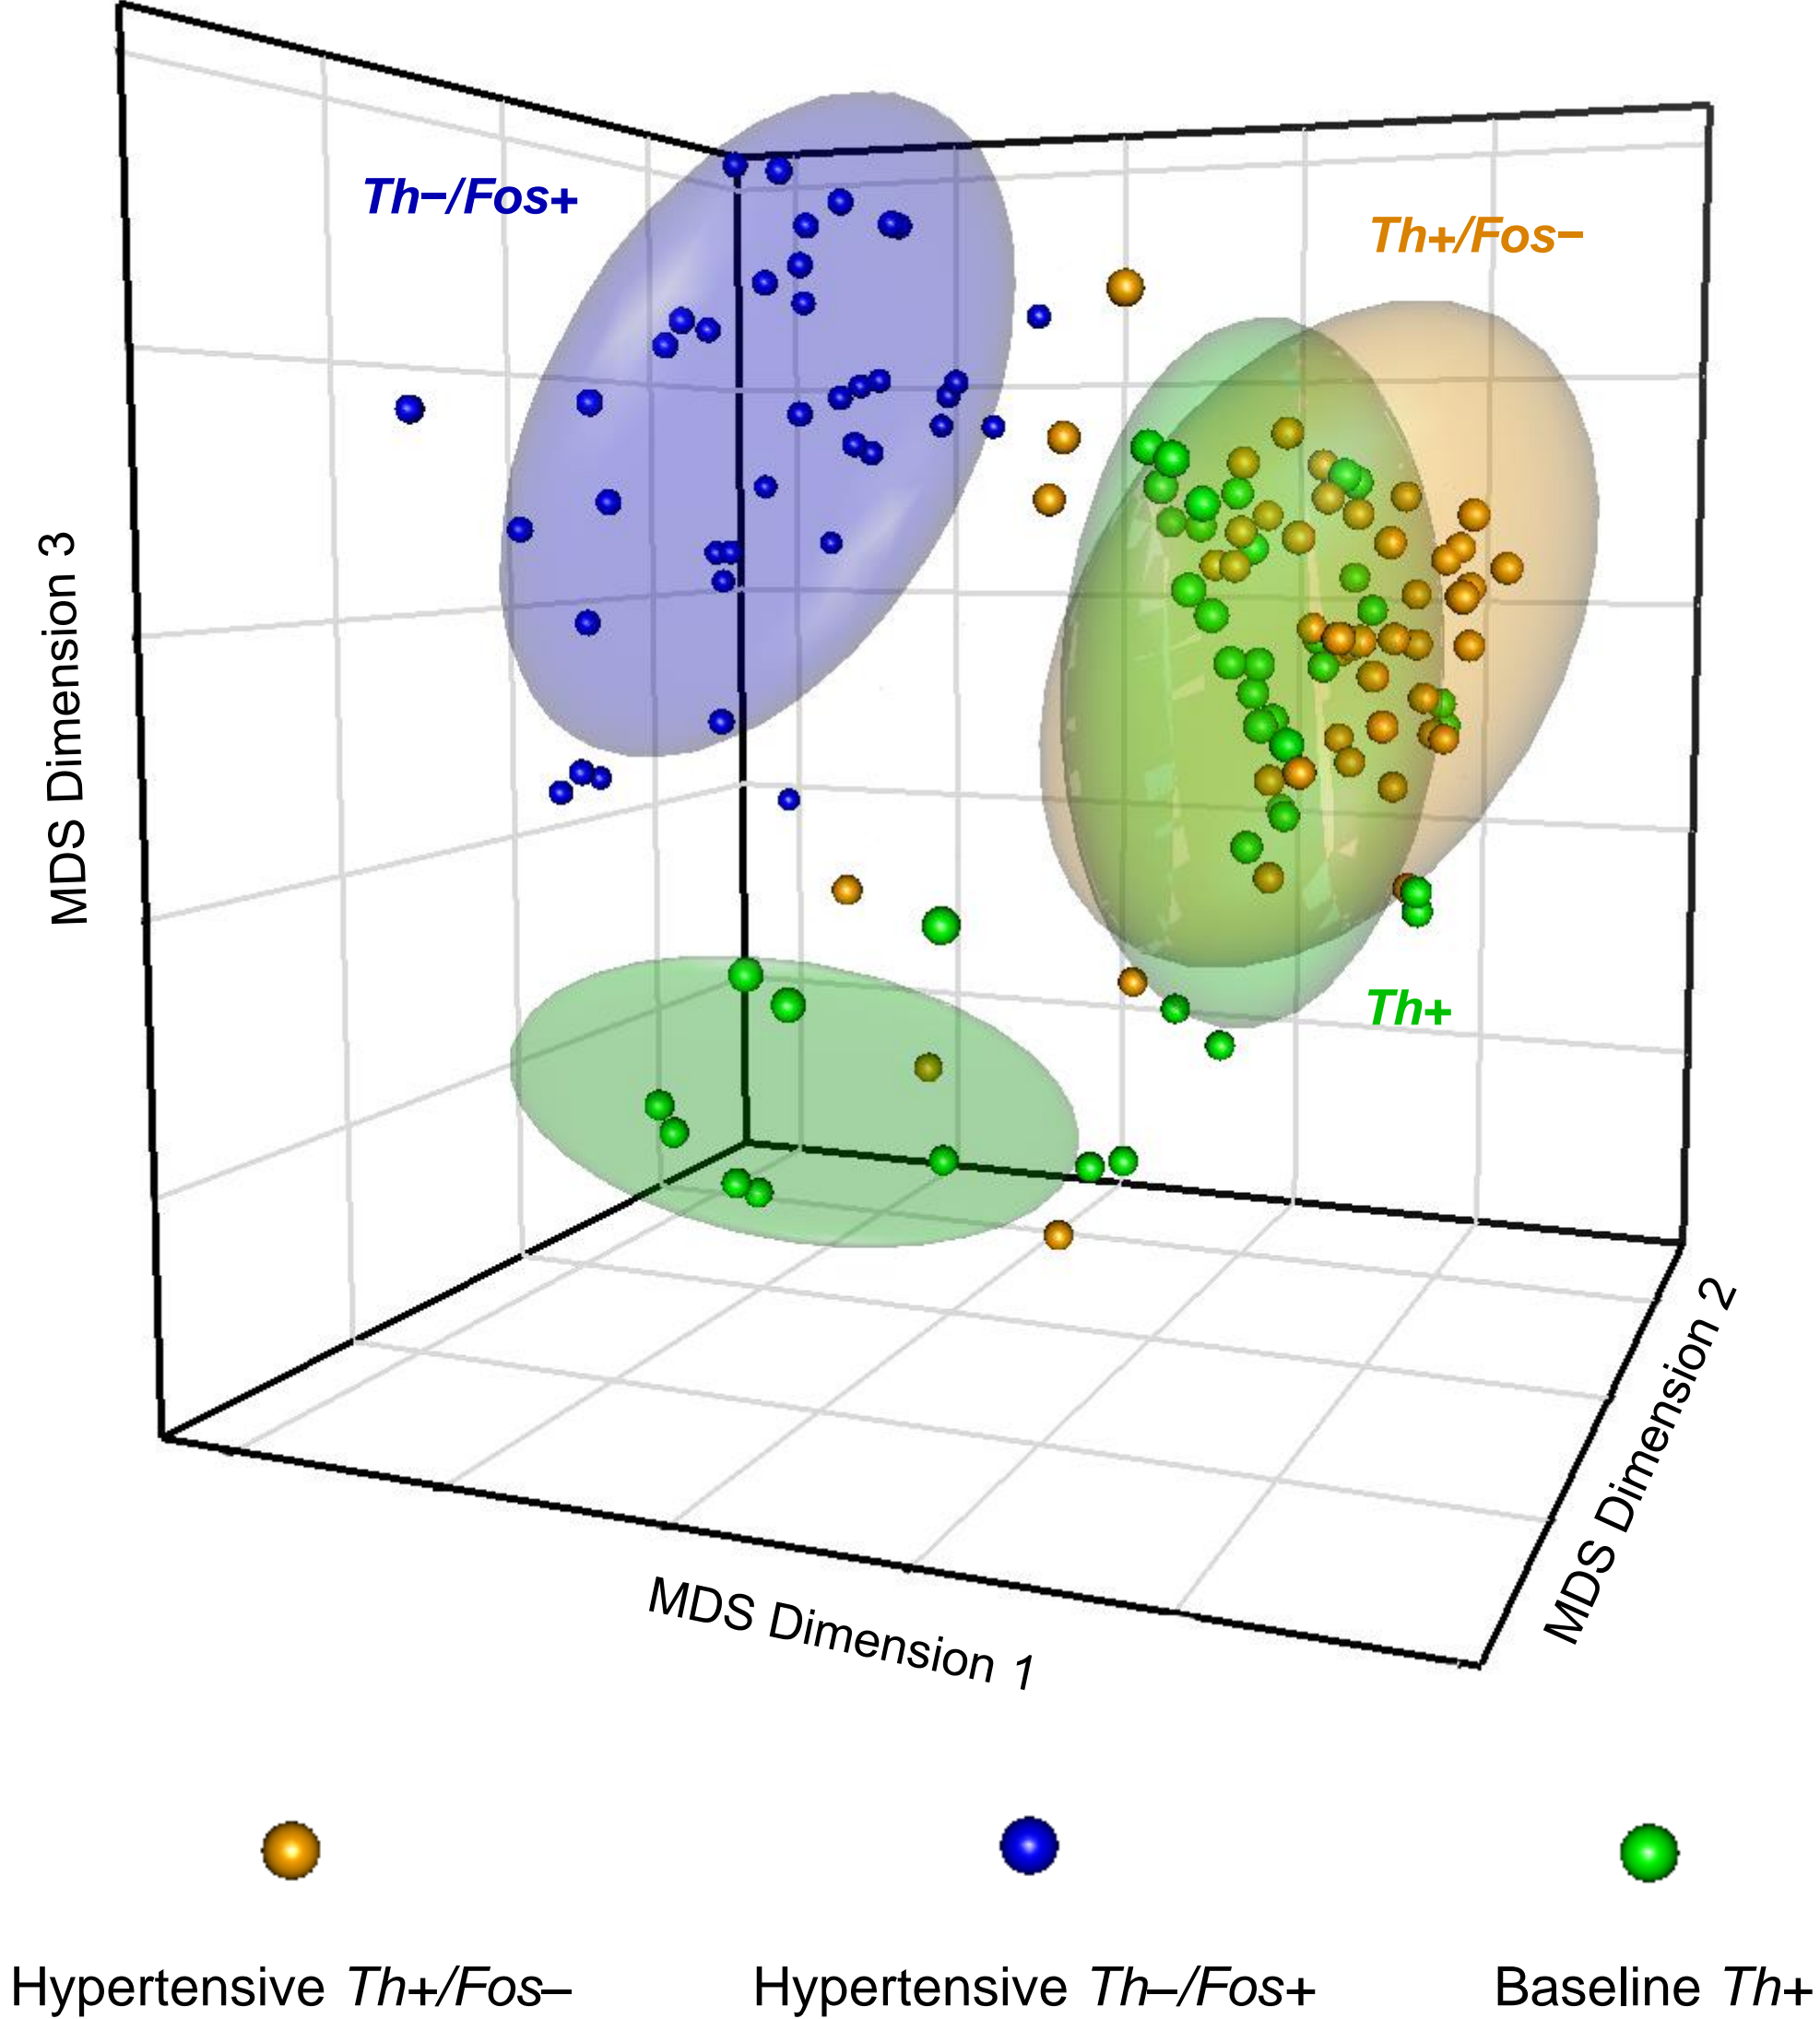



Figure S14

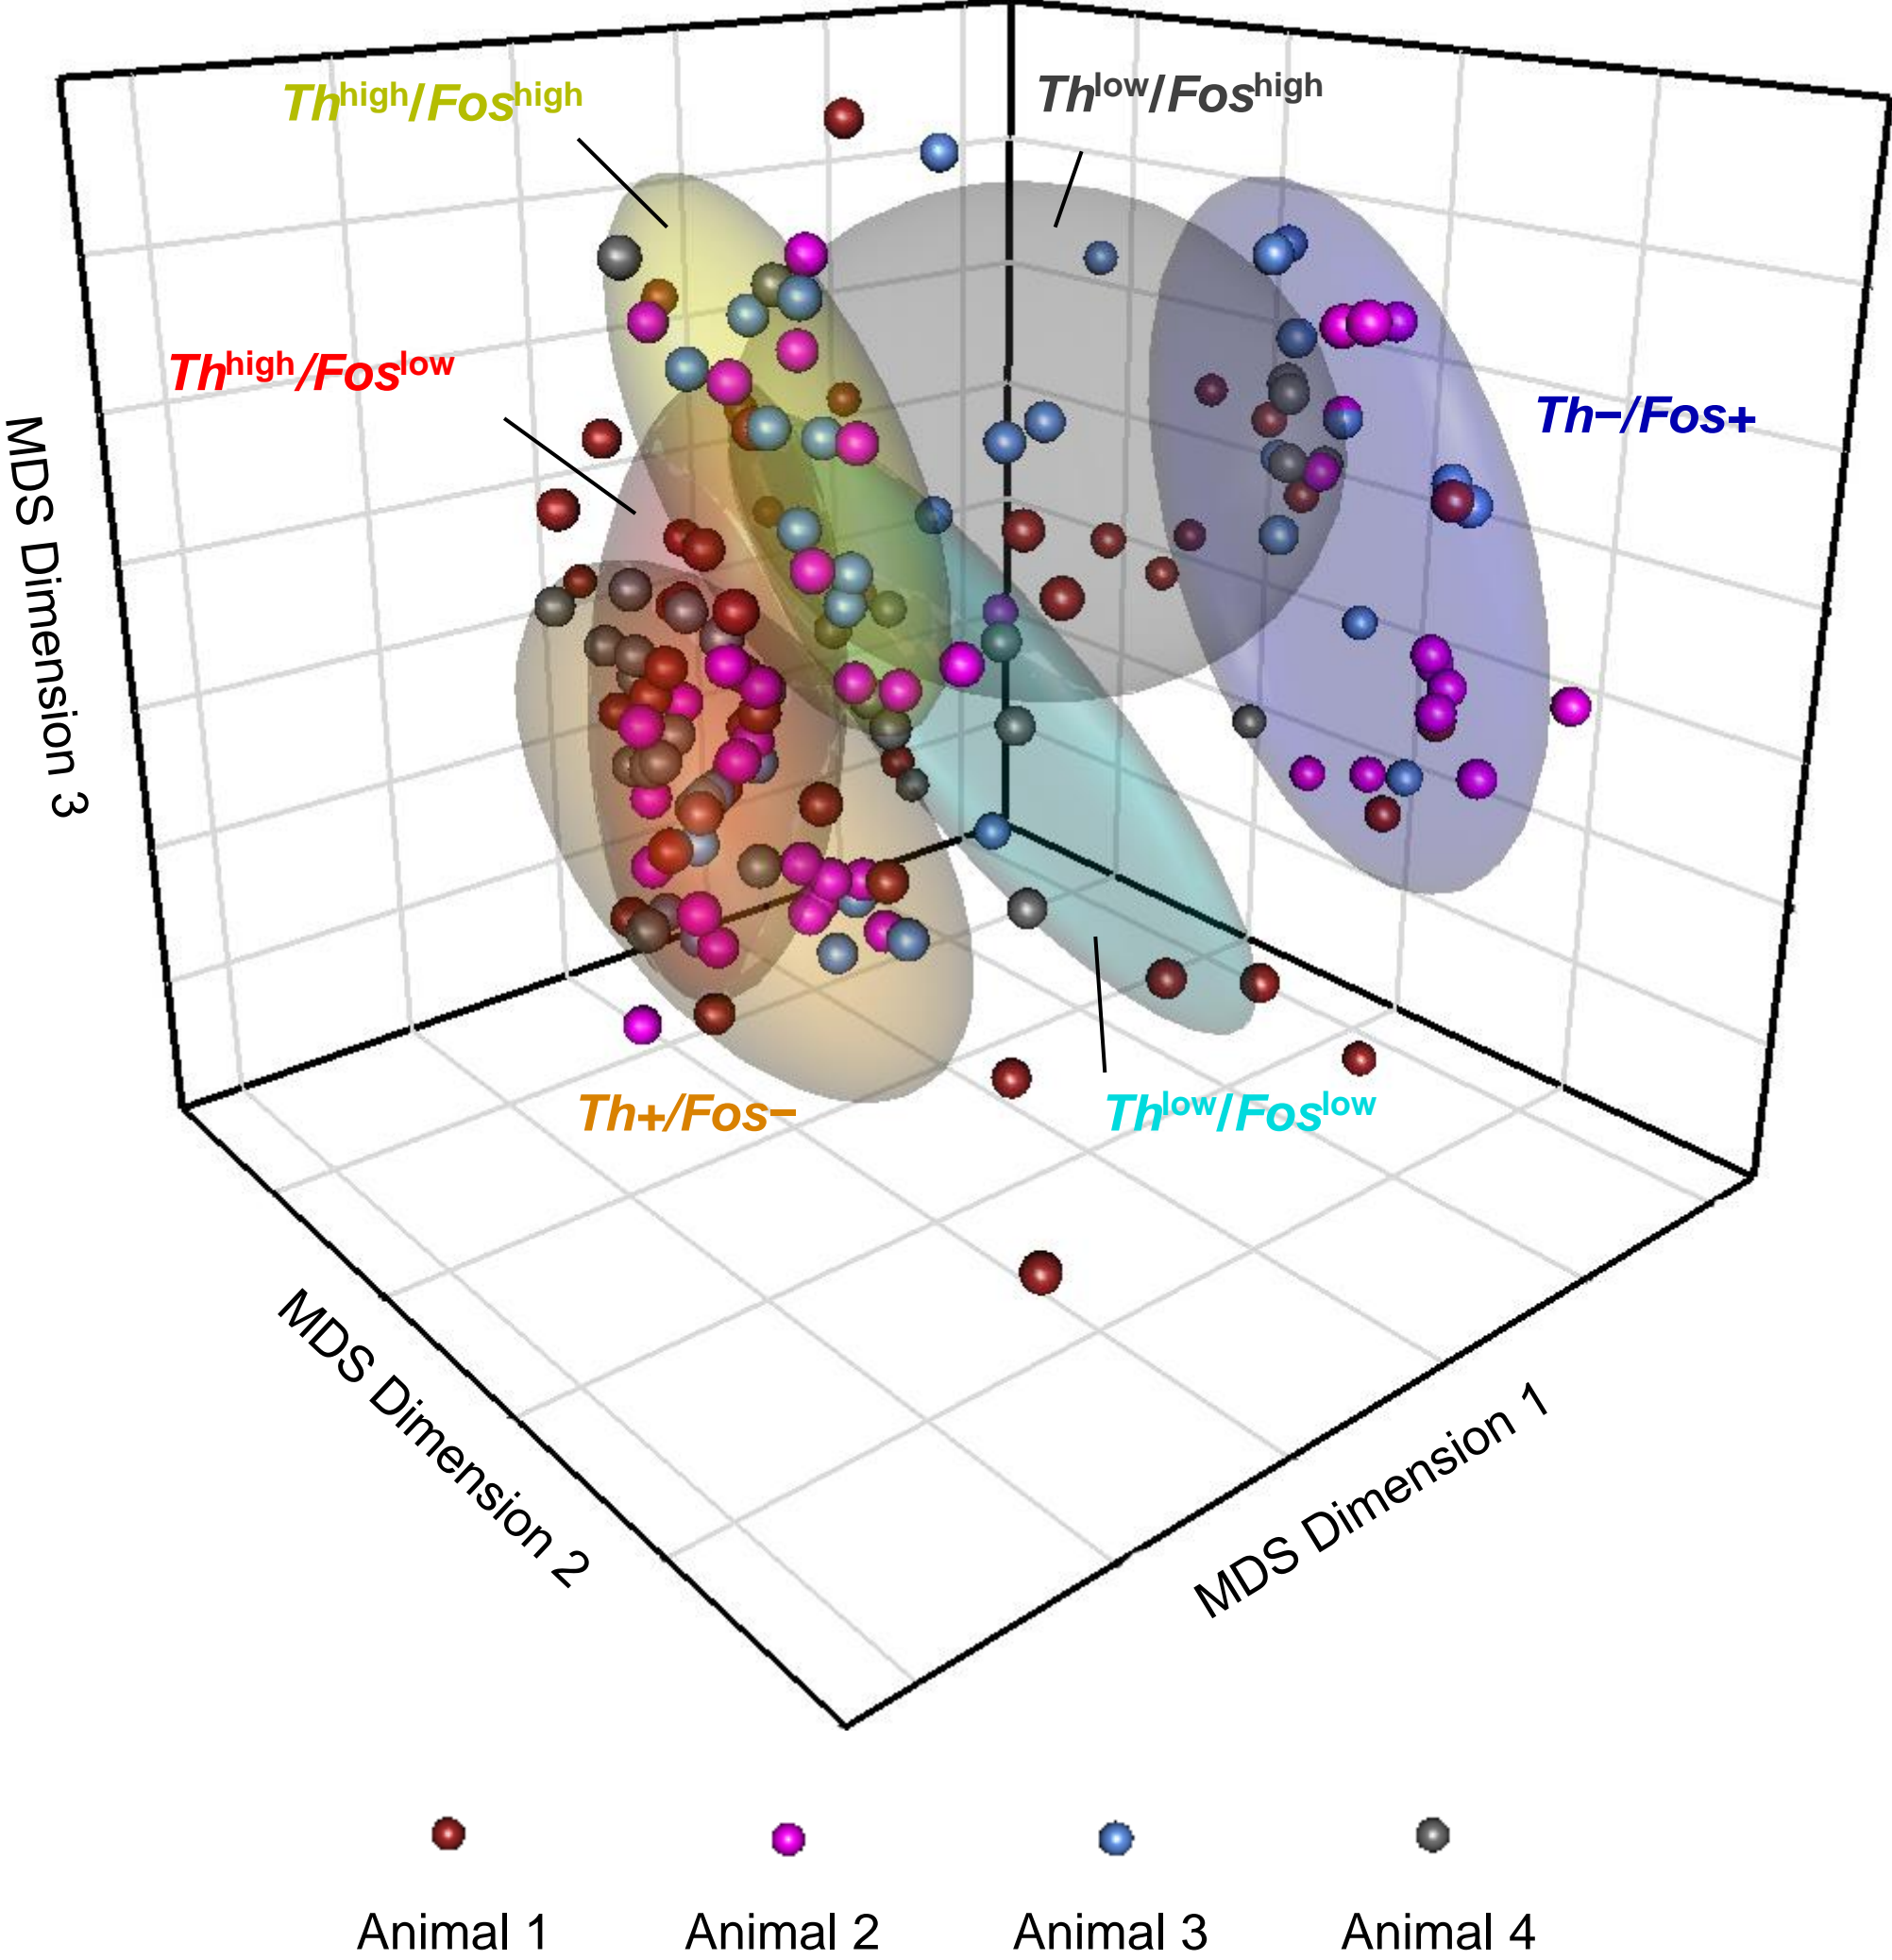

Supplement: Supplemental_Material.pdf [file Supplemental_Material.pdf]
