# Supplementary material for: Inputs drive cell phenotype variability
Source: HighWire-hosted journal article supplement (doi:10.1101/gr.161802.113), 2014-03-26
Supplement: TableS1_S2.xlsx [file TableS1_S2.xlsx]

## Sheet: Table S1
Sample.Code	TH+ NTS Sc3_con2_R	TH+ NTS Sc6_con2_R	TH+ NTS Sc8_con2_R	Th+ Sc6_con2_C	TH pos NTS SC 1_con1_R	TH pos NTS SC 2_con1_R	TH pos NTS SC 3_con1_R	TH pos NTS SC 4_con1_R	TH pos NTS SC 5_con1_R	TH pos NTS SC 6_con1_R	TH pos NTS SC 7_con1_R	TH pos NTS SC 8_con1_R	TH pos NTS SC 9_con1_R	TH pos NTS SC 10_con1_R	TH pos Sc 1_con1_I-2	TH pos Sc 2_con1_I-2	TH pos Sc 3_con1_I-2	TH pos Sc 4_con1_I-2	TH pos Sc 7_con1_I-2	TH pos Sc 8_con1_I-2	TH pos Sc 10_con1_I-2	TH pos NTS Sc 1_con1_C	TH pos NTS Sc 10_con1_C	TH pos NTS SC 1_con1_R	TH pos NTS SC 2_con1_R	TH pos NTS SC 3_con1_R	TH pos NTS SC 4_con1_R	TH pos NTS SC 5_con1_R	TH pos NTS SC 6_con1_R	TH pos NTS SC 7_con1_R	TH pos NTS SC 8_con1_R	TH pos NTS SC 9_con1_R	TH pos NTS SC 10_con1_R	TH pos Sc 1_con1_I-2	TH pos Sc 2_con1_I-2	TH pos Sc 3_con1_I-2	TH pos Sc 4_con1_I-2	TH pos Sc 7_con1_I-2	TH pos Sc 8_con1_I-2	TH pos Sc 10_con1_I-2	TH pos NTS Sc 1_con1_C	TH pos NTS SC4_hyp1_I-1	TH pos NTS SC2_hyp3_I-2	TH pos NTS SC10_hyp3_R	TH+ NTS SC7_hyp2_I-2	TH pos NTS SC3_hyp3_I-2	TH+ NTS SC6_hyp2_I-1	TH pos NTS SC6_hyp3_I-2	TH + NTS SC 5_hyp1_R
Cell.Type	TH pos	TH pos	TH pos	TH pos	TH pos	TH pos	TH pos	TH pos	TH pos	TH pos	TH pos	TH pos	TH pos	TH pos	TH pos	TH pos	TH pos	TH pos	TH pos	TH pos	TH pos	TH pos	TH pos	TH pos	TH pos	TH pos	TH pos	TH pos	TH pos	TH pos	TH pos	TH pos	TH pos	TH pos	TH pos	TH pos	TH pos	TH pos	TH pos	TH pos	TH pos	TH pos	TH pos	TH pos	TH pos	TH pos	TH pos	TH pos	TH pos
Preamp.Well.Pos	P5-E5	P5-E8	P5-E10	P5-F10	P5-A8	P5-A9	P5-A10	P5-A11	P5-A12	P5-B1	P5-B2	P5-B3	P5-B4	P5-B5	P5-B11	P5-B12	P5-C1	P5-C2	P5-C5	P5-C6	P5-C8	P5-D1	P5-D10	P5-A8	P5-A9	P5-A10	P5-A11	P5-A12	P5-B1	P5-B2	P5-B3	P5-B4	P5-B5	P5-B11	P5-B12	P5-C1	P5-C2	P5-C5	P5-C6	P5-C8	P5-D1	P1-B12	P3-C10	P3-B4	P2-F3	P3-C11	P2-D2	P3-D2	P1-A5
Sample.Type	single cell	single cell	single cell	single cell	single cell	single cell	single cell	single cell	single cell	single cell	single cell	single cell	single cell	single cell	single cell	single cell	single cell	single cell	single cell	single cell	single cell	single cell	single cell	single cell	single cell	single cell	single cell	single cell	single cell	single cell	single cell	single cell	single cell	single cell	single cell	single cell	single cell	single cell	single cell	single cell	single cell	single cell	single cell	single cell	single cell	single cell	single cell	single cell	single cell
Animal.ID	2509209.con	2509209.con	2509209.con	2509209.con	2485965	2485965	2485965	2485965	2485965	2485965	2485965	2485965	2485965	2485965	2485965	2485965	2485965	2485965	2485965	2485965	2485965	2485965	2485965	2485965	2485965	2485965	2485965	2485965	2485965	2485965	2485965	2485965	2485965	2485965	2485965	2485965	2485965	2485965	2485965	2485965	2485965	2496487	2509212.a	2509212.a	2498971	2509212.a	2498971	2509212.a	2496487
Treatment	Control	Control	Control	Control	Control	Control	Control	Control	Control	Control	Control	Control	Control	Control	Control	Control	Control	Control	Control	Control	Control	Control	Control	Control	Control	Control	Control	Control	Control	Control	Control	Control	Control	Control	Control	Control	Control	Control	Control	Control	Control	PE 1hr	PE 1hr	PE 1hr	PE 1hr	PE 1hr	PE 1hr	PE 1hr	PE 1hr
Anatomical.Region	NTS	NTS	NTS	NTS	NTS	NTS	NTS	NTS	NTS	NTS	NTS	NTS	NTS	NTS	NTS	NTS	NTS	NTS	NTS	NTS	NTS	NTS	NTS	NTS	NTS	NTS	NTS	NTS	NTS	NTS	NTS	NTS	NTS	NTS	NTS	NTS	NTS	NTS	NTS	NTS	NTS	NTS	NTS	NTS	NTS	NTS	NTS	NTS	NTS
Localization	R	R	R	C	R	R	R	R	R	R	R	R	R	R	I2	I2	I2	I2	I2	I2	I2	C	C	R	R	R	R	R	R	R	R	R	R	I2	I2	I2	I2	I2	I2	I2	C	I1	I2	R	I2	I2	I1	I2	R
BM.Chip	1361660213	1361660213	1361660213	1361660213	1361660219	1361660219	1361660219	1361660219	1361660219	1361660219	1361660219	1361660219	1361660219	1361660219	1361660219	1361660219	1361660219	1361660219	1361660219	1361660219	1361660219	1361660219	1361660219	1361660221	1361660221	1361660221	1361660221	1361660221	1361660221	1361660221	1361660221	1361660221	1361660221	1361660221	1361660221	1361660221	1361660221	1361660221	1361660221	1361660221	1361660221	1361660217	1361660219	1361660219	1361660213	1361660219	1361660213	1361660219	1361660217
Cell.mRNA.Expr	TH pos controls	TH pos controls	TH pos controls	TH pos controls	TH pos controls	TH pos controls	TH pos controls	TH pos controls	TH pos controls	TH pos controls	TH pos controls	TH pos controls	TH pos controls	TH pos controls	TH pos controls	TH pos controls	TH pos controls	TH pos controls	TH pos controls	TH pos controls	TH pos controls	TH pos controls	TH pos controls	TH pos controls	TH pos controls	TH pos controls	TH pos controls	TH pos controls	TH pos controls	TH pos controls	TH pos controls	TH pos controls	TH pos controls	TH pos controls	TH pos controls	TH pos controls	TH pos controls	TH pos controls	TH pos controls	TH pos controls	TH pos controls	TH pos no cfos expr	TH pos no cfos expr	TH pos no cfos expr	TH pos no cfos expr	TH pos no cfos expr	TH pos no cfos expr	TH pos no cfos expr	TH pos no cfos expr
Ace	15.9121	12.7543	12.3416	14.1709	10.9662	11.5905	15.2289	13.6339	15.3075	11.3578	12.5929	12.3609	12.457	13.5126	13.3121	15.3173	13.1356	13.2988	13.4595	13.3943	12.9122	NA	NA	10.8518	11.5776	15.0947	13.474	15.7631	11.2352	12.8735	12.53	12.1531	13.9386	13.5588	15.3039	13.3349	13.3131	13.5824	13.8077	13.6046	NA	14.4518	12.8066	14.1522	14.31	11.1224	12.6907	13.2036	12.7954
Actb	8.0399	6.33959	7.26674	8.03712	4.77021	6.33289	7.25527	6.24803	8.02172	6.15473	7.07174	6.00077	6.85717	6.11922	7.81141	8.05806	6.76064	7.0556	7.10649	6.79195	7.71521	8.70552	8.62955	5.46684	7.41594	7.94783	6.89908	8.85138	6.04561	7.18486	6.88826	6.15283	6.42852	7.89887	8.24748	7.45138	7.1	8.0171	6.71012	7.76092	8.23582	8.1198	7.4638	7.42713	8.25009	6.75694	6.44267	7.2418	7.83847
Adrbk1	15.4063	15.0861	15.1491	15.0216	13.0892	13.99	16.2744	13.8435	17.3517	13.0915	14.4262	13.6154	13.9912	13.5785	14.0941	15.1535	14.1538	14.0547	13.9782	13.9944	14.7838	16.6863	16.4793	13.8765	14.5047	16.3463	14.1246	17.4295	13.2509	14.7288	13.9367	11.3504	13.1504	14.3995	14.9397	13.963	14.6188	14.3268	14.5234	15.1944	15.2361	14.9142	15.648	14.4729	NA	13.8558	12.6628	13.6494	15.0004
Agt	11.1597	10.0193	10.2484	12.5694	11.5887	12.7437	14.6781	12.5205	13.0942	12.5568	12.5391	11.6856	13.2197	11.2652	10.6794	11.6842	14.8314	12.2443	12.818	12.7083	13.3473	13.2293	15.2763	11.4454	12.9081	14.7188	12.5945	13.2377	12.7607	13.0392	11.9227	13.087	11.2841	10.6855	11.6569	14.9741	12.4337	13.24	12.9882	13.9534	13.0947	11.9984	10.6257	10.9379	12.7556	10.5479	11.4332	10.6818	10.294
Agtr1a	14.2542	12.1298	12.5139	12.3657	11.085	11.6764	13.8381	15.2386	16.1641	13.8219	13.9104	15.7973	15.8206	14.3805	10.6725	13.5343	14.0454	14.9858	15.1485	14.9167	14.9124	12.1674	14.9777	11.5545	12.3833	14.0851	15.7223	16.7772	13.9006	14.7847	16.2182	16.2213	14.5702	10.7586	13.4048	14.35	15.7376	15.4147	15.7835	15.7989	11.888	13.7065	14.6313	13.2054	13.9272	15.4208	15.3444	12.9313	15.5433
Agtrap	22.0073	18.3582	18.8472	18.2559	17.3022	19.2728	21.1566	20.9672	23.0246	18.2939	20.2917	18.6047	19.1497	19.5249	17.2249	21.8362	21.0507	19.5121	20.4406	18.4557	21.2552	NA	NA	17.1495	19.4369	21.8784	21.5856	NA	18.7829	19.9502	19.6025	18.2037	19.6013	17.6563	21.8135	21.7352	18.9785	20.9598	18.1443	22.2093	NA	20.4721	21.1717	18.7399	21.673	18.4968	17.203	19.0663	20.2784
Akt1	14.704	14.1271	13.638	14.3706	12.1749	13.28	17.4584	13.4769	15.7301	12.181	13.4369	12.726	12.2628	12.7386	13.9132	15.4936	14.2529	13.9739	14.8503	13.1155	14.2001	NA	17.2622	12.3998	13.8711	17.8816	13.3629	16.3537	12.4324	13.7204	13.3518	12.0263	12.6065	14.2531	15.2939	14.3706	13.221	15.4431	13.4219	14.5343	NA	14.6707	13.1885	15.0524	16.0208	13.3375	12.645	12.4286	13.3035
Araf	13.694	12.9931	12.8398	14.5386	11.7643	12.3089	14.8041	12.3759	13.7629	11.7865	12.6099	12.6261	11.8116	12.0902	14.9089	15.5886	13.1584	13.7707	14.6938	13.1733	14.0202	14.7928	13.9977	11.6208	12.1858	15.0628	12.0428	13.7227	11.9141	12.7538	12.735	11.5257	12.1724	14.5768	16.3744	13.4528	13.6603	14.9368	13.589	14.0747	14.3647	13.6521	12.9929	13.2852	13.7409	12.6713	11.8517	12.1157	13.2861
Arrb1	15.4156	13.6036	14.0587	14.5649	13.4019	13.7271	15.3046	14.3954	17.4038	12.3194	13.0136	13.5284	13.2646	12.5945	13.4058	14.4695	13.51	13.9711	14.9187	14.0369	14.7378	16.1687	17.3629	13.9041	13.9999	14.5935	13.282	18.2909	11.5036	13.2625	13.6822	13.0928	12.5402	13.3363	14.8484	13.2437	14.2044	14.4775	13.664	15.2222	16.7382	13.8128	14.7762	13.9057	16.7626	13.7355	12.6295	12.7823	13.6579
Arrb2	14.4589	14.0354	14.1782	14.218	12.585	14.7764	14.0589	13.2558	16.4492	12.2439	13.6043	13.1516	12.8903	13.098	15.061	14.4122	15.3621	13.6663	14.0667	13.0979	14.5064	15.2585	16.983	12.6484	14.9215	14.1386	13.134	16.7991	12.3594	13.5851	13.209	12.2241	12.9921	15.004	13.9738	15.4242	13.9389	14.0057	13.2525	14.9192	14.849	14.312	14.3213	15.5914	15.1722	14.2156	13.2874	13.4276	14.1609
Atf2	12.7443	10.6722	11.4382	13.2833	10.5509	11.3498	13.7947	11.2182	14.0729	10.5392	11.079	10.9773	11.087	10.4552	13.5896	12.8269	11.1844	11.9212	11.9772	11.1883	12.343	16.4974	15.2764	10.256	11.4088	13.6947	11.0214	13.9062	10.4416	11.0923	10.7475	10.1398	10.1485	13.2558	12.409	10.9324	11.7513	11.1932	10.7359	12.4642	15.9466	12.2844	11.438	13.168	13.7002	11.2823	10.4123	10.8888	12.1822
Cacna1d	16.3895	13.6782	13.9188	NA	13.0977	11.7333	15.3673	14.2955	14.5059	12.7227	11.6235	12.8914	14.2968	13.7832	15.3033	20.8361	14.116	15.2175	15.9897	14.3078	15.4425	14.6003	15.5181	13.5304	12.1924	15.573	14.2351	14.8702	12.475	11.7815	12.9998	13.7354	13.592	15.4664	21.3361	14.6572	15.5195	16.6493	14.4996	15.6542	14.6648	13.8663	13.9396	13.7485	16.09	12.9952	12.2715	11.7374	13.7228
Fos	18.6727	14.2926	13.679	14.659	13.6152	16.0115	16.4557	17.0537	15.4231	13.5635	13.927	14.0108	18.1095	14.503	15.1676	NA	NA	13.3662	16.4447	16.3054	16.3013	17.5035	NA	13.449	16.6652	16.9032	16.5947	15.4227	12.3103	13.5748	14.5085	18.6285	14.7969	15.4679	NA	NA	12.6403	16.7147	16.5418	16.8743	17.3621	16.9199	18.2984	NA	NA	16.5232	NA	17.4311	NA
Creb1	16.6431	17.1302	17.264	15.2354	15.6174	16.5568	17.1356	18.1396	18.2103	15.663	17.4399	16.113	18.4154	16.4744	14.9853	18.336	16.6649	16.5463	17.0155	15.3322	17.6297	17.3627	17.3892	15.1788	16.9024	17.677	18.0413	19.3856	17.2132	18.6041	17.5016	18.6273	16.0908	15.6274	18.9987	17.0066	17.4494	17.8667	16.7562	18.0192	16.8005	18.9052	17.3196	17.9898	20.2568	17.8954	17.5276	16.9338	18.1896
Crh	15.0956	16.1281	13.7314	12.5634	11.9945	14.5459	14.4677	15.9215	NA	15.2388	12.8034	14.0505	NA	NA	11.5279	14.0755	15.2624	NA	16.4314	14.1493	14.2854	12.1358	14.7373	11.9977	15.1614	14.7746	16.198	NA	15.6321	13.043	14.3453	NA	NA	11.5622	14.0831	15.4427	NA	16.1651	14.6473	14.6312	12.2268	24.6336	15.4344	17.3425	NA	NA	15.8262	16.593	NA
Dbh	11.4033	7.68327	8.19	10.3588	6.37732	6.61168	11.2692	17.3191	8.32113	6.83708	6.93565	7.51497	14.9422	8.29865	16.9872	NA	10.7012	12.5263	9.21738	10.1496	9.14629	12.7344	13.0188	6.17159	6.66689	11.3431	16.9437	7.99977	6.53112	6.99019	7.21892	14.3873	8.41531	16.2992	NA	10.393	12.6556	9.14261	10.1478	9.10403	12.3719	8.65879	7.54292	8.24952	9.46245	7.49739	5.84108	7.40142	8.05296
Dusp6	16.1855	13.9866	13.8857	16.5328	12.711	13.208	15.4083	NA	17.0906	15.8069	13.8589	17.6264	17.6681	14.4279	NA	NA	15.4815	16.1701	14.7544	15.8098	NA	NA	NA	12.1544	13.2751	15.8808	NA	16.8371	15.8812	13.6736	16.7896	16.4109	13.8584	NA	NA	15.5106	15.9453	15.3252	16.0175	NA	NA	NA	13.6468	20.6343	15.9177	14.883	16.2959	14.2437	14.2886
Egr1	13.7014	13.7034	10.0174	10.172	11.5866	10.8171	13.5879	12.1618	12.9803	9.77216	10.3186	10.3957	14.1081	9.67728	12.0729	NA	14.7117	11.4026	12.0722	13.0168	12.9043	NA	NA	11.4174	10.7603	13.5126	11.6366	12.7638	9.21515	10.3219	10.0707	13.5659	9.5933	11.664	NA	14.3631	11.2348	11.9138	12.7677	13.0054	NA	11.2095	11.4752	12.6435	15.609	12.9107	12.0295	12.6057	12.9552
Elk1	17.0895	14.4118	15.9329	13.5732	13.9555	13.8868	16.3725	16.3048	18.517	12.6519	13.8925	13.7177	14.3401	17.0169	14.3964	15.9174	15.4068	14.3573	13.9614	12.6845	14.7765	16.9862	NA	13.6524	14.3598	16.9071	16.1016	18.2679	12.6324	13.8224	13.587	13.4116	16.3235	13.731	15.2172	14.5845	14.3345	13.4727	12.7783	15.2473	15.8155	14.9088	15.6134	14.7812	15.4121	15.8584	13.6355	13.2596	14.7434
Fosl1	16.0231	14.8884	16.7175	16.7222	16.5285	15.0269	17.3217	18.6182	NA	14.9161	15.9966	15.478	NA	17.9114	NA	17.7717	17.648	NA	17.1654	17.4889	16.357	NA	NA	14.9863	15.2843	17.1444	17.7296	NA	14.8248	15.1442	15.3199	NA	17.1033	NA	17.592	17.4796	NA	17.1915	17.4695	15.8476	NA	NA	17.3436	15.9055	17.005	16.096	15.1288	18.5036	15.2631
Gabra1	13.6937	13.8345	13.1786	12.1814	14.4874	15.9649	NA	10.1005	NA	13.3138	13.7842	10.0495	8.78132	10.2761	12.9032	12.6305	11.4896	10.1774	14.1396	10.0346	11.6588	15.8135	11.1478	14.4108	15.815	NA	9.96592	NA	13.4947	13.905	9.91199	8.75987	9.83053	12.7302	12.3444	11.3216	10.8759	14.1304	9.96571	11.8648	14.9246	15.2176	13.0968	15.8104	16.2068	13.9799	12.9656	15.0392	16.6794
Gabra2	13.2963	11.7477	11.7551	13.4204	12.1536	12.9715	15.4872	12.7987	16.0005	11.5634	11.5317	12.2816	12.1142	10.5838	12.7194	12.9619	13.3363	12.0821	13.0129	12.5096	13.9249	15.702	13.0858	11.7496	12.8014	15.4495	12.3596	15.7798	11.4378	11.4774	12.0936	11.4818	10.1097	12.403	12.8352	13.1264	11.8956	12.7794	12.5445	13.84	15.3285	11.2822	12.1767	15.4047	16.1751	13.6036	11.4871	12.4504	13.3147
Gabra4	16.4424	14.5081	15.5785	15.7122	14.8966	15.2073	17.5413	13.9497	18.4538	15.6273	13.7007	12.5949	12.8796	13.6632	14.9615	17.0385	13.8702	13.6578	14.6738	13.5495	15.2209	NA	16.2862	15.2469	16.4166	18.4812	14.2093	19.0295	16.7104	14.1904	13.5071	13.3162	13.903	15.1079	17.0232	14.0808	13.6851	15.9359	13.8772	15.9783	NA	15.411	15.3319	16.5298	NA	16.8297	13.8682	14.1745	NA
Gabrq	12.2602	11.8825	12.1404	13.938	12.1798	11.2697	13.9612	14.1395	14.0849	11.2103	11.1841	12.795	12.699	12.0221	16.0571	NA	13.6129	14.2572	12.2101	13.8512	14.2026	NA	16.9005	12.3117	11.4496	13.998	14.3215	14.0797	11.3729	11.6797	12.9657	12.5449	11.6259	15.8562	NA	13.9127	14.3047	12.352	14.0648	14.7128	NA	12.738	11.2242	12.208	15.346	11.1821	11.467	11.1925	13.571
Gad1	NA	17.116	11.6811	15.7981	11.9354	NA	NA	NA	NA	15.989	14.3843	NA	18.259	10.7779	17.5651	NA	NA	13.1761	15.1777	NA	15.1668	16.5218	NA	12.2007	NA	NA	NA	NA	16.1035	14.3958	NA	17.8542	11.0687	17.6733	NA	NA	13.5437	15.3552	NA	15.573	16.2131	13.4446	18.3267	17.4751	16.5085	14.9823	15.842	14.3486	17.5146
Gal	18.7305	14.7344	17.0053	14.664	15.3156	14.1427	16.8886	18.31	NA	NA	15.8806	13.8453	NA	18.379	14.8233	14.8738	24.389	16.4931	NA	16.3119	17.7927	21.9382	16.9942	15.6669	14.2438	16.7916	18.7053	NA	NA	16.2482	13.945	NA	17.997	14.2069	14.4685	24.3766	16.2666	NA	16.1909	17.429	21.0282	11.5017	17.9846	15.5019	13.7991	17.3011	NA	12.5513	17.1408
Gria2	15.2291	13.6959	15.6542	14.5589	13.8085	15.1186	15.2646	17.2934	18.6457	14.0813	13.128	15.4612	15.4569	16.1609	14.7077	NA	16.4581	16.9214	15.7292	15.0897	16.1274	19.631	17.7709	13.7646	14.8001	14.4722	16.8293	18.1818	13.9751	13.454	14.7398	13.5039	14.897	13.9059	NA	15.6444	16.5516	15.3753	14.6067	15.9056	17.982	15.679	14.045	15.2638	13.9345	13.9793	11.9303	13.4851	14.8136
Gria3	21.1726	16.5245	17.7775	NA	18.3533	16.9916	17.0772	22.4487	23.3014	16.0531	15.124	17.009	NA	17.9789	18.715	NA	NA	20.3383	16.9889	21.3437	19.6741	NA	NA	17.8612	16.8657	16.2796	20.202	22.8029	15.4654	14.982	16.4472	NA	16.7235	17.5023	NA	24.73	19.471	16.301	20.2679	19.2692	NA	18.6146	16.7307	17.8828	17.048	16.0638	14.7244	16.5643	16.8592
Grin1	16.7328	14.7477	13.3042	16.0844	13.5744	12.7896	14.7506	11.5438	16.9715	12.5025	16.1944	11.5539	11.174	12.25	15.6181	14.8092	12.7128	13.9155	14.3344	12.364	14.3987	NA	14.47	13.7426	12.9109	13.8598	11.6241	17.3694	12.4275	16.5497	11.6189	10.8216	12.0609	15.3802	14.7589	12.8319	14.1511	14.0399	12.3152	14.6201	NA	13.9095	13.8815	17.6029	NA	12.5977	13.2432	12.6621	13.504
Grin2a	14.7838	13.247	14.6929	13.8203	12.1666	14.3828	16.12	14.9573	15.541	13.3912	12.284	13.5774	14.2733	14.0769	13.4898	17.7499	14.7979	14.2034	13.8095	14.0662	14.6848	15.3476	16.3441	12.4586	14.8804	15.8911	15.0185	15.9571	13.4142	12.3158	14.1717	14.5534	13.8582	13.56	17.5459	15.0405	14.3563	13.8184	14.3401	14.9773	15.7822	13.2188	14.2682	13.9684	16.2229	14.3624	12.9211	13.2954	14.8708
Grin2b	16.3578	12.8284	13.7742	15.7947	12.813	13.4168	14.3266	15.3799	16.6772	13.0758	11.5539	13.1577	15.1294	12.8369	15.336	15.6302	13.3575	12.675	13.6505	13.655	14.2939	NA	15.1153	12.7522	13.5746	13.5903	14.9357	16.9873	12.9228	11.6938	13.0959	14.2794	12.3594	14.9592	15.194	13.3879	12.9624	13.6163	13.5761	14.2196	NA	13.0078	13.9569	14.9917	NA	13.0127	12.5659	13.0099	12.9705
Grin2c	17.8669	16.7036	17.7425	NA	19.0234	NA	NA	19.8579	17.1316	17.7368	18.088	14.6313	NA	14.3257	14.2856	17.9468	18.6527	16.8615	14.6678	14.7129	NA	15.375	18.3162	19.2395	NA	NA	20.0441	17.891	18.1685	18.0424	16.2022	NA	14.705	13.644	17.4178	18.5486	16.7644	15.4757	15.0347	NA	14.7666	18.4751	16.3023	16.4577	15.6525	18.476	15.6173	16.4869	14.2341
Grk5	NA	15.4835	14.8174	13.0233	12.5417	15.2669	15.2473	15.9014	NA	13.5576	14.3455	15.8628	13.6105	16.2596	13.4916	16.15	14.6443	14.2361	17.421	14.305	17.1257	14.2705	12.7454	12.0966	15.323	15.0163	15.8741	NA	13.1646	14.4131	15.6594	12.5772	15.536	13.351	15.6715	14.5613	14.5216	16.964	13.8796	17.2632	14.0768	16.2645	15.7672	15.9471	15.6547	13.6522	14.3856	14.8723	16.4615
Hcn2	14.0567	10.8226	11.8534	12.4149	10.7121	10.9774	13.8099	11.6266	14.0718	10.2252	11.6032	11.6076	10.7851	9.61262	12.2777	12.8939	12.1224	10.8546	11.8601	10.4262	12.383	10.2044	10.9464	10.4486	10.744	13.5893	10.7969	13.6222	10.0326	11.5126	11.4641	9.76967	9.20809	11.8385	12.4553	11.6328	10.9745	11.2004	9.96536	12.0085	9.70003	12.2935	10.6665	12.1106	12.207	11.2023	10.4338	11.9712	11.0526
Hprt1	10.3076	8.74895	8.74981	10.4458	8.71522	9.65375	11.8908	9.57221	10.9931	9.40275	9.43388	9.21187	9.43715	9.02006	11.3815	10.7848	10.406	9.75311	10.0619	9.57674	10.2577	14.9309	14.0542	8.3835	9.51344	11.3752	9.22657	10.6452	9.30061	9.26883	9.01518	8.8091	8.8672	11.1316	10.4714	10.1125	9.80723	9.39398	9.20477	10.1203	14.7899	11.0779	10.1315	11.2345	11.0454	9.94453	8.83839	9.33173	10.6792
Hras	13.9226	12.9284	13.1482	12.2374	11.2475	12.8921	13.2483	15.4466	16.8435	16.3554	14.941	16.7241	14.5351	NA	10.4913	14.4335	15.8992	18.3024	15.5012	15.9214	15.355	11.8527	14.4496	11.3905	13.122	13.6301	15.1138	16.6488	16.4623	14.6279	16.5119	13.8186	NA	10.4541	13.991	16.2034	17.6436	15.3051	15.815	15.5294	11.5532	16.9028	15.2535	14.5974	16.1814	NA	14.9298	NA	16.4253
Itpr1	17.6974	14.7538	15.6547	17.8522	11.6902	12.7926	16.22	16.5489	17.1889	14.1747	13.4537	14.4078	15.8092	13.5728	14.7153	16.4499	14.443	13.8747	15.3958	14.9703	NA	NA	17.2178	12.1619	13.5377	16.3732	16.7389	16.8213	14.5161	13.5079	14.8237	16.183	13.8973	14.837	16.5471	14.538	14.3108	15.3642	15.2922	NA	NA	17.0843	14.7768	17.0052	17.3412	13.5513	18.5852	14.8366	13.9675
Jun	13.5428	11.8674	11.4953	10.764	9.37489	11.2988	12.601	11.791	14.3902	9.89662	9.99122	11.5807	11.3104	11.8047	10.7474	12.9422	12.9574	12.3583	13.147	12.7539	13.0947	11.2288	11.4193	8.81093	11.6383	13.5744	11.9457	14.7862	10.0939	10.5323	11.485	11.5649	11.6867	10.3569	12.8071	12.9377	12.5852	13.0021	12.8783	13.1666	10.7098	12.8861	10.8108	12.1603	13.6942	10.6923	11.0534	10.1484	12.376
Junb	13.0136	12.7843	12.3127	10.5788	9.58773	11.1683	12.7375	15.3752	16.8546	10.4849	11.6196	12.2541	13.7284	13.4272	10.3169	13.7255	13.7893	12.8814	13.4984	13.0265	14.8483	11.5152	14.9064	9.63053	11.6963	13.0471	16.2744	17.4564	11.0084	11.6618	11.7308	13.8535	13.346	10.1911	13.5491	13.4001	12.5781	13.8783	12.889	14.2684	11.8226	13.273	14.1538	12.8162	16.9947	13.2468	13.7122	13.4862	14.1833
Jund	11.319	10.0301	9.78527	9.99393	8.43823	9.05631	10.3824	10.2131	10.9421	9.15923	9.09766	9.45458	9.47352	9.78827	9.67486	11.3857	10.1724	10.6735	10.5897	9.61538	10.7669	9.42908	9.12754	7.65182	9.77148	10.606	10.0971	11.2216	8.92458	8.93984	9.5761	9.25747	10.0904	9.63796	11.6365	10.4963	10.8577	10.7271	10.2073	10.9193	9.57516	11.3796	9.59964	8.98272	11.517	10.0868	9.37403	9.40772	10.5048
Kcnj2	19.7604	13.4462	12.1063	10.1227	11.3833	13.6905	13.1596	14.903	17.337	13.4506	17.1105	13.9342	NA	16.1451	11.0635	15.2255	15.1578	15.4227	15.7484	15.9564	NA	12.466	15.2637	10.8647	13.3765	12.1395	13.7228	16.7968	12.6559	16.6629	13.8159	NA	15.3237	10.0385	14.474	14.6874	14.5409	15.4164	15.2636	NA	11.2315	15.2639	15.2755	15.1336	16.1821	16.4937	12.1296	15.3927	16.8792
Map2k1	13.8077	12.389	12.633	14.1724	11.0548	11.7019	14.3628	11.9062	13.8159	11.3111	12.5267	11.1944	11.9558	11.743	14.2054	14.2555	12.8412	12.2094	13.7106	12.6427	14.4468	16.6924	13.9409	11.0353	11.8196	13.8802	11.8812	14.1068	11.0388	12.3683	11.2014	11.3264	11.2751	13.9362	14.1493	12.9579	12.8215	13.8219	12.5682	14.4013	16.2618	13.6747	12.3293	12.8997	14.9417	11.854	11.2235	12.1331	12.8985
Map2k7	14.6395	13.4329	13.7923	14.2055	12.3286	13.2762	13.5089	13.237	15.3837	12.9388	12.2445	13.2884	12.6742	12.7357	14.4715	15.1621	14.2172	15.2443	12.6395	12.3729	14.3355	14.62	NA	12.4701	13.3936	13.6363	13.3794	15.6045	13.16	12.409	13.3027	11.9009	12.2673	14.1895	15.5647	14.1853	15.5129	12.5775	12.5946	14.4651	14.0206	14.9592	12.475	14.7825	14.5911	13.6235	12.1081	13.5602	13.763
Map3k11	16.6942	15.0625	15.8393	14.4951	13.3522	15.8009	15.6175	17.2487	19.2411	14.2026	14.9765	15.8766	16.9056	17.0081	14.0331	16.6083	18.9122	15.5092	16.4662	14.5993	18.4643	14.2608	14.7676	13.2784	16.0538	15.0621	17.1958	20.0011	14.4942	15.006	16.1906	16.4934	17.2599	13.937	16.5538	18.3896	15.8659	16.75	15.2687	18.5773	14.4009	19.4428	13.8002	14.2516	15.0377	15.0811	15.3803	15.3483	16.6659
Map3k12	14.4406	11.627	12.6753	13.0889	11.6424	11.9699	15.2503	12.1081	15.2069	11.6614	11.7355	11.448	11.2731	11.4978	11.7981	15.1229	12.4066	13.8433	13.115	11.8456	14.309	12.0557	11.7622	11.8082	12.2523	15.0809	11.9264	15.0496	11.6676	11.5542	11.7678	11.1996	11.7383	11.8631	15.031	12.6168	14.297	13.1393	12.3835	14.0414	11.9789	13.397	13.4818	12.9201	14.8727	12.8034	11.5864	11.9367	12.7447
Mapk1	13.6889	10.8006	11.9848	11.494	10.4799	11.4013	13.1227	10.8558	14.4781	10.636	11.6012	11.359	10.4272	10.7293	12.3017	12.536	11.1888	10.7507	12.211	10.8517	12.5289	21.8797	NA	10.558	11.5714	12.9915	10.7906	14.3462	10.2991	11.2914	11.3612	8.71725	10.079	11.7879	12.2118	11.1904	11.4037	12.4131	11.0502	12.4854	20.7228	11.6633	10.7531	12.3918	13.4149	10.939	8.67187	10.7106	11.5357
Mapk3	14.8143	13.404	13.523	14.1911	12.8721	12.9422	13.7663	12.7038	16.9476	12.7135	13.0442	12.5471	11.4872	13.5744	13.8985	13.2376	12.5873	12.2292	12.6724	10.9354	12.5319	16.5502	15.5155	12.5329	13.506	14.5375	12.6695	16.373	12.2678	12.8863	11.2236	10.5585	13.6077	12.8872	13.3529	12.3362	12.2444	12.5159	9.04669	12.8735	16.256	16.1949	12.3575	14.5111	13.2122	13.7705	11.5881	12.9693	14.0552
Mapk7	16.6251	16.8758	17.0046	16.6134	13.6805	15.9626	17.105	14.6188	18.391	14.2658	14.4231	15.5623	14.2128	17.1371	16.8818	15.4948	16.4297	15.4986	14.5065	14.8544	NA	16.2641	16.5184	13.954	16.271	17.1901	14.4178	18.9334	14.4215	14.6236	15.9453	13.9729	16.7391	16.9592	15.5107	16.4222	15.6622	14.6622	15.1227	NA	15.9425	17.0199	17.4801	15.795	16.8151	15.8318	15.2139	16.1122	17.1746
Npy	13.5197	9.96794	12.5716	10.4632	11.4904	14.3678	13.3467	15.5511	17.2781	13.7833	14.5279	15.7872	14.5381	15.5443	9.81513	12.0946	14.4022	14.8647	16.213	13.6634	14.3501	12.6914	15.762	11.0045	14.9649	13.1105	15.3943	17.9436	13.7503	14.6194	16.504	14.7319	15.3629	9.89642	11.9468	14.3432	14.5201	16.5849	14.3629	14.7714	13.0142	16.6662	15.2855	13.4049	15.3502	12.1928	15.1764	10.6562	NA
Npy1r	14.2809	13.6686	12.3609	11.0621	9.9169	12.9651	12.7302	NA	NA	12.1086	14.1506	15.3112	NA	10.7269	10.5271	13.1404	13.5161	13.1256	13.8322	12.8334	15.2071	11.8218	14.6861	8.95585	12.5577	13.2877	NA	NA	12.3858	14.4399	15.5756	NA	10.8515	10.6034	12.9691	13.8478	13.4229	13.7597	13.1453	15.3602	11.8921	15.1995	13.9705	13.8535	15.3063	14.4651	13.8365	13.9065	14.4438
Pak1	13.1645	11.981	11.3507	13.3031	10.6665	11.1539	15.6684	11.9046	13.0065	10.6274	11.3318	11.1146	11.2104	10.1508	11.7996	13.0526	12.741	11.9685	12.349	11.9661	13.0078	14.383	13.7385	10.6339	11.5836	15.4417	12.0134	13.0972	10.9456	11.7433	11.4634	11.2768	10.2281	11.7938	13.016	13.1084	11.8809	12.1207	12.0304	13.1067	14.6287	12.2676	11.5814	12.0173	13.5853	11.0795	11.3145	11.0225	12.3264
Pdpk1	15.2468	12.166	12.1193	13.2539	11.733	12.7623	14.1687	11.9597	16.4096	11.3371	11.3798	11.4543	10.7953	11.5169	13.8656	12.0092	11.4775	11.6258	12.4016	10.9947	12.5436	17.3026	15.4128	11.634	13.1255	14.1401	11.6731	16.1551	11.1922	11.4132	11.5585	10.5035	11.0454	13.4104	11.5927	11.3141	11.7713	12.3175	10.8081	12.6088	16.232	12.7206	12.6648	12.7214	13.4943	11.9234	11.3011	11.6215	12.044
Pebp1	10.5789	9.99815	9.73732	10.8671	7.96432	9.113	11.4683	8.34929	10.4511	8.16081	9.5152	9.12631	8.67533	7.96936	9.95965	11.0564	9.83725	9.21219	10.4535	9.62925	10.4101	10.2528	9.00334	8.46274	9.25104	11.1937	8.16268	9.98615	8.12542	9.74952	8.96281	7.9787	7.77465	9.76862	10.6203	10.3072	9.23166	10.7243	9.30352	10.5625	9.57435	9.75766	10.3407	10.7759	10.6827	10.177	8.87031	9.10721	10.6533
Phox2b	13.5031	12.7924	13.2738	13.743	10.5102	11.7569	13.8019	11.7626	13.3034	11.0932	11.2928	11.3221	11.1759	13.4261	15.4439	14.2176	13.1108	13.4847	15.1966	12.5414	13.8967	13.499	11.2819	10.285	11.5371	13.5863	11.0497	12.8747	11.0344	11.1776	11.4808	10.4246	12.7278	15.3199	14.044	12.9041	13.6199	14.8809	12.3287	13.4955	13.1565	14.2435	11.6173	11.392	14.4265	11.7174	11.1888	12.0607	11.1216
Pik3r3	14.8409	13.0338	12.3487	13.3331	11.6036	12.4993	14.285	13.4873	14.835	12.5931	13.6452	12.7609	12.363	12.2248	12.8257	13.9097	12.6716	12.4103	13.2242	11.6641	13.5978	16.3508	15.0931	11.5958	12.2293	14.3266	12.7086	14.9331	12.5704	13.3496	12.8623	11.8544	11.6082	11.7773	14.0123	12.6883	12.5809	13.207	11.525	13.5631	16.1285	15.2321	12.4623	13.0253	16.6701	12.332	11.5384	13.0396	13.8683
Prkca	24.6528	20.9298	NA	21.9988	22.1839	NA	23.182	26.7823	NA	21.6949	22.331	25.5613	NA	NA	25.2613	24.1799	NA	21.1203	21.2436	20.074	23.1393	NA	NA	20.4276	23.6018	20.1105	23.358	NA	20.6926	20.0938	22.4116	21.7361	22.4834	21.9589	21.6355	23.4004	21.0618	19.7482	18.4761	21.4057	NA	26.8485	24.3069	24.4828	NA	22.4559	19.0447	25.9448	21.2755
Plcb1	16.9932	13.8014	15.0017	12.6844	14.3691	18.0456	15.459	16.822	26.132	15.3215	14.6306	14.6629	16.6506	15.1357	14.6584	17.2548	16.8488	17.3655	16.7487	14.3249	15.854	22.0153	18.1775	13.9795	17.8035	14.6919	15.7677	21.1376	15.1715	13.8628	14.6232	14.0616	13.3514	13.4865	16.121	16.2488	17.2705	15.8061	13.5305	15.3267	19.5169	16.4295	16.7166	15.5258	15.0005	15.9199	12.8173	15.3965	18.9255
Ppp1cb	13.6929	12.2783	12.1758	13.4389	11.0728	12.2327	15.4045	12.8204	15.6234	12.4197	12.6463	12.1379	12.6696	12.1006	12.6176	13.8394	12.9077	12.9267	13.7035	12.5192	13.5338	14.1902	14.0571	10.9774	12.4854	14.9085	12.0067	15.4649	12.2222	12.0726	12.2674	11.5792	10.742	12.1809	13.5755	12.7736	12.8537	13.3043	12.1664	13.6307	13.7762	13.8613	13.1657	13.1968	15.0054	12.4058	12.3683	13.0503	13.5079
Ppp1cc	14.5542	14.295	13.7126	14.5076	14.9024	13.822	NA	13.6108	16.3602	13.0599	13.924	13.9606	14.8631	13.3597	13.3954	13.9078	12.8717	14.0583	14.1876	14.2292	14.8429	18.3533	15.2278	14.7786	14.0878	NA	13.2022	15.8049	12.7325	13.6977	14.2627	15.0201	13.2926	12.911	14.2694	13.2301	13.7046	14.0795	13.6829	15.1364	17.2069	17.1279	14.3652	15.2613	16.5167	15.0807	13.6947	14.9564	14.9128
Ppp2r1a	9.75609	8.86947	9.28183	10.8783	8.53863	9.23163	11.679	9.10884	10.4901	8.63319	9.46793	8.55028	8.24922	7.62627	10.7135	10.0916	9.99306	9.10635	10.5885	8.91819	9.90332	12.2429	9.28576	8.33081	9.39624	11.7605	9.0127	10.3879	8.6777	9.22638	8.50401	7.9099	7.34749	10.7936	10.0285	10.1816	9.24728	10.1808	8.83863	10.1123	12.2094	9.82741	9.29271	9.83705	11.0319	8.65687	8.57574	8.96231	10.3521
Ppp5c	14.0332	10.9056	12.9399	12.9685	11.6564	12.0264	15.7358	12.7559	14.143	11.3181	12.455	11.9874	13.312	12.3407	13.9709	14.46	12.4976	12.7383	13.5412	12.5628	13.2667	15.2214	13.7866	11.2213	11.9948	14.5201	11.7653	13.0062	10.6651	11.5828	11.6026	11.3641	10.7144	12.5923	13.7329	11.7091	12.5174	12.6623	11.8696	12.676	13.5335	14.7351	13.1191	13.6322	12.8125	12.9016	10.7407	12.7927	12.1965
Prkce	13.9419	12.8735	12.3992	13.5237	12.3388	12.556	18.2399	12.957	16.3674	13.1267	12.3921	12.3275	12.2746	11.4586	12.8518	12.8468	12.9007	12.5724	12.5428	11.9969	13.7325	13.9879	13.6281	12.4686	12.8643	18.1686	12.7803	16.632	13.4683	11.9744	13.1015	12.6453	11.2855	12.8214	12.9635	13.2504	12.8568	12.3458	13.1452	13.7708	13.9994	13.7153	12.9367	13.5162	15.349	13.0192	13.0046	11.9319	14.4966
Ptpn1	17.0183	15.6543	14.5832	14.6776	14.6092	NA	16.5509	16.8057	NA	15.1938	14.0943	13.9136	17.0306	16.4037	15.6134	NA	15.4148	NA	NA	15.637	16.6841	22.9318	NA	14.6214	NA	16.5021	16.7329	NA	15.1944	14.2147	14.0896	16.349	15.6047	15.3724	NA	15.4692	NA	NA	15.366	17.1444	22.6177	23.1407	15.8815	NA	16.2225	16.0249	15.7153	15.3744	NA
Ptpn2	NA	NA	16.7048	NA	14.6777	17.9798	17.0627	NA	17.8687	18.8601	16.6324	17.2756	18.9978	NA	16.949	21.9832	16.5087	18.5997	NA	16.7081	18.5065	NA	NA	15.232	18.2532	17.2923	NA	18.0736	19.5576	16.7636	17.9155	18.6641	NA	17.2813	22.6517	17.1215	18.8276	NA	17.3451	19.2661	NA	NA	NA	17.7128	18.5141	NA	16.4216	17.3719	17.4962
Raf1	19.7492	17.5771	17.822	19.6484	17.2545	18.1224	21.2622	20.3672	26.2271	17.5021	20.5163	18.2913	22.0723	21.9085	19.9536	22.4254	20.1716	20.7242	24.3938	19.2138	20.2627	27.8517	22.3006	16.653	17.5558	19.5289	19.2189	21.6298	17.0698	19.5524	17.7009	16.2139	18.4506	17.5167	20.7213	19.343	20.7844	21.7116	17.3677	19.4034	22.0214	19.5296	19.3482	20.1597	18.1914	19.3656	16.0417	19.2178	17.7191
Rasa1	16.2177	14.3936	15.2264	14.9519	13.0334	14.0555	15.9671	14.3647	19.0978	13.6984	13.8472	12.9718	13.902	13.6491	15.2271	16.1565	14.6542	14.6781	15.3173	13.6482	14.6	19.5311	17.0648	12.7184	14.6413	15.3566	13.903	19.914	13.3285	13.4074	13.8205	12.7496	13.6523	14.781	15.2574	14.3723	14.6935	15.0254	12.8891	14.523	19.465	16.981	15.386	15.8056	15.6976	15.1444	12.3913	14.6226	14.8911
Rasgrf1	17.346	13.7174	14.4357	12.6494	11.2549	13.8448	15.935	NA	17.0221	15.1242	15.1295	15.2551	17.1578	13.5771	12.018	13.3428	14.4699	15.7119	15.1385	16.4182	16.5636	13.6329	16.7662	12.0175	13.6971	14.6611	NA	17.7147	14.43	15.953	15.9031	17.0449	13.8612	11.3308	14.4788	14.8218	14.8665	15.3578	16.8469	17.3016	13.3469	18.2115	15.9813	17.1408	NA	15.161	15.0281	16.0754	NA
Rasgrf2	17.0564	14.4957	13.5397	13.6835	12.4884	13.4248	NA	13.6737	17.2461	12.3996	13.8685	12.2685	12.5365	12.9683	12.7859	15.25	13.1303	13.1251	13.8183	13.9818	13.3812	15.6552	14.8249	12.814	13.6367	NA	13.901	17.4883	12.6821	14.4595	12.4914	12.0502	12.656	12.7821	15.7054	12.8206	13.2437	14.2606	14.4312	13.9894	15.0052	16.2981	12.7514	16.0073	14.8947	13.2599	13.2159	13.326	14.0626
Rasgrp1	12.9992	12.2113	12.2602	13.9606	12.0019	11.2642	12.7833	13.1262	13.7258	12.5995	12.536	11.011	11.0692	11.9492	12.9577	12.8969	12.5179	12.8581	11.9499	11.3853	12.5471	16.1776	14.6659	12.2788	11.4557	13.4701	13.8242	13.7133	12.7795	12.5421	10.9264	11.2803	11.7068	13.3746	13.0633	12.631	13.2465	12.3334	11.5377	12.4213	16.3516	13.5306	12.6598	13.0785	13.967	11.2214	10.2788	11.4001	12.1399
Rgs1	14.8695	15.0051	15.0201	11.4989	11.4723	12.4349	13.3863	NA	NA	13.3592	NA	NA	15.8844	19.0495	10.8113	13.3346	14.9482	16.2788	15.823	15.6602	NA	11.7528	NA	11.8107	12.3752	13.3186	NA	NA	13.4669	NA	NA	15.631	19.2436	10.9688	13.4103	15.0879	16.7189	15.8911	15.9151	NA	11.7728	15.901	NA	15.7589	16.0885	15.8833	16.935	15.7893	NA
Rgs2	14.9484	13.2032	12.7938	14.6208	10.2104	12.7048	17.0519	15.5825	14.4618	12.7342	13.4519	13.9429	14.5856	13.1867	14.1652	13.4283	13.4948	12.7916	12.0004	13.0037	13.845	16.9112	20.8449	11.1285	13.1456	16.8777	15.715	14.2989	13.0388	13.7845	14.7327	14.5581	13.1723	13.8925	13.7773	13.5667	13.4528	12.3388	13.3071	14.6375	16.3661	13.5212	14.1992	13.4618	15.6325	12.4951	12.1296	12.9405	13.0853
Rgs3	NA	15.9688	15.897	15.0937	14.7705	17.4291	18.433	16.2608	19.9844	16.971	16.0474	16.1704	17.0676	19.1334	16.8318	20.4077	18.0921	18.3586	17.8144	14.6713	16.223	19.4163	18.1897	14.4964	17.6715	17.4674	15.2413	19.7124	16.8803	15.1917	16.162	14.6469	17.5015	16.0609	19.4013	17.3667	18.5208	17.6556	14.348	16.4287	18.0735	17.9222	15.7742	16.6898	14.1925	14.9739	12.4184	15.7625	15.4112
Rgs4	12.1082	10.2641	10.8206	12.619	9.30368	9.74283	14.6927	10.267	11.835	9.01023	11.045	10.3101	10.6977	11.3794	12.8323	12.3067	11.0382	11.3777	10.854	10.6548	11.4149	NA	15.3417	10.0002	10.0794	15.3368	10.7966	12.3899	9.79595	11.4821	10.6219	10.7737	11.2644	13.1011	12.2879	11.2006	11.8159	10.3322	10.7255	10.4237	NA	12.7274	10.9043	11.035	13.8177	10.1221	10.4843	10.1353	11.107
Rpl19	12.1169	10.6135	10.6254	11.0024	9.2449	10.651	13.2861	12.0747	14.4346	9.66666	11.0554	10.6309	11.4306	11.7501	12.0959	12.5706	11.1925	11.0511	10.3485	10.421	11.3733	13.0362	13.1398	9.22382	10.8554	12.9283	11.7154	14.3124	10.168	10.7301	10.512	10.4752	11.1909	11.4546	12.0811	10.8525	10.6532	10.2607	9.94516	11.1246	12.28	12.0391	12.0352	11.4981	12.2404	11.3439	9.97074	11.0052	11.0103
Slc32a1	19.552	17.3453	14.4023	13.9386	13.3969	15.3769	15.9377	NA	18.6013	14.5183	14.9741	17.7092	18.134	11.9891	13.2915	16.684	17.3407	14.4243	16.0155	17.4822	17.9535	14.1125	18.4755	12.6274	16.836	16.0449	NA	19.8149	15.9009	14.0202	18.5772	17.7629	11.4741	13.1235	16.7963	17.6055	14.8924	15.7028	17.9431	18.8377	14.0724	15.5173	17.193	15.8688	17.0703	16.6846	17.8584	14.9676	NA
Slc6a2	14.3942	13.5377	11.1981	12.7756	11.1261	10.8722	14.039	11.6172	12.7595	10.7735	11.4636	12.9406	12.331	11.2799	13.982	15.813	12.7109	12.1912	13.2473	13.1881	12.4177	NA	14.9397	11.533	10.5958	14.1204	11.654	12.813	10.6284	11.4667	12.6808	12.2191	11.1281	13.7347	16.5326	12.9361	12.8658	13.3265	13.4851	12.6692	NA	12.3489	12.0986	11.2078	14.698	10.2609	10.4288	10.6543	10.9403
Slc9a3r1	15.7644	14.2535	14.8668	15.5161	12.3756	15.1386	14.9039	14.7553	NA	13.3052	15.5143	14.664	15.9437	14.6468	14.0437	15.3158	16.0419	13.5642	14.9111	12.5177	16.5452	16.6862	16.7304	13.0412	15.2643	15.2923	14.9269	NA	14.5686	15.508	14.8788	16.6348	14.8387	14.6527	16.084	16.1976	14.2231	15.5959	13.4734	16.9159	17.6052	17.1042	15.6233	17.8179	14.2657	15.1096	15.0164	14.3087	15.8019
Sst	13.9265	11.0293	14.2275	11.164	10.8162	13.7962	14.0102	13.5491	17.3321	12.34	11.8231	15.4834	16.7657	12.3037	9.43703	14.4387	14.0625	12.6218	10.7912	13.9852	10.5934	11.9647	14.2263	10.3812	13.6396	13.3618	13.0152	16.8352	12.184	11.4489	15.0838	15.6854	11.5961	8.82546	13.7744	13.4774	12.3063	10.4934	13.4958	10.236	11.44	13.9655	14.8279	12.7122	13.8647	15.0531	11.405	11.0972	NA
Syn1	11.7422	10.2618	10.5439	9.97809	10.7008	11.1516	12.7846	10.3565	13.6381	10.2151	10.899	9.99527	9.4539	9.46668	10.8702	11.4795	10.4592	9.87807	10.8066	9.71878	10.6955	12.8575	10.6983	10.9615	11.3941	12.9265	10.6091	13.8827	10.4917	11.0457	9.48516	9.17358	9.54662	10.8846	11.1163	10.5065	9.79827	10.8875	9.97862	10.6704	12.6794	12.1956	10.8202	10.3224	12.5115	9.86285	10.22	10.1538	11.2959
Tac1	13.4111	14.6359	12.8055	11.3387	11.6328	12.2414	13.386	17.1317	12.5129	13.9192	13.1883	15.9652	16.8193	15.2466	10.7743	13.66	15.2247	14.6547	14.8799	15.5875	13.6222	12.5133	NA	11.9187	12.7773	13.8171	17.2409	12.8819	14.1132	13.5137	16.3553	17.1992	15.2835	10.9479	13.9687	15.1282	15.2407	15.1174	16.2074	13.9228	12.5011	15.3889	17.5755	15.8608	15.5941	15.7437	13.2648	14.542	NA
Th	9.69156	7.80575	7.33125	8.98195	6.78145	7.83189	12.5501	8.99114	8.32997	7.4246	8.25235	7.78209	8.10406	9.02203	11.5155	10.6181	9.13385	9.88735	8.71388	9.00017	9.08761	13.15	13.3313	6.84636	7.26554	12.2594	8.45153	7.68835	7.66373	8.5236	7.77433	8.46433	8.86997	11.1739	10.6476	8.83339	9.49217	8.76173	8.28488	9.00055	13.5559	9.19545	8.88543	8.59926	9.43413	8.25038	7.49076	8.43442	8.88095
[truncated: 143 more columns]

## Sheet: Table S2
Sample.Code	TH+ NTS Sc3_con2_R	TH+ NTS Sc6_con2_R	TH+ NTS Sc8_con2_R	Th+ Sc6_con2_C	TH pos NTS SC 1_con1_R	TH pos NTS SC 2_con1_R	TH pos NTS SC 3_con1_R	TH pos NTS SC 4_con1_R	TH pos NTS SC 5_con1_R	TH pos NTS SC 6_con1_R	TH pos NTS SC 7_con1_R	TH pos NTS SC 8_con1_R	TH pos NTS SC 9_con1_R	TH pos NTS SC 10_con1_R	TH pos Sc 1_con1_I-2	TH pos Sc 2_con1_I-2	TH pos Sc 3_con1_I-2	TH pos Sc 4_con1_I-2	TH pos Sc 7_con1_I-2	TH pos Sc 8_con1_I-2	TH pos Sc 10_con1_I-2	TH pos NTS Sc 1_con1_C	TH pos NTS Sc 10_con1_C	TH pos NTS SC 1_con1_R	TH pos NTS SC 2_con1_R	TH pos NTS SC 3_con1_R	TH pos NTS SC 4_con1_R	TH pos NTS SC 5_con1_R	TH pos NTS SC 6_con1_R	TH pos NTS SC 7_con1_R	TH pos NTS SC 8_con1_R	TH pos NTS SC 9_con1_R	TH pos NTS SC 10_con1_R	TH pos Sc 1_con1_I-2	TH pos Sc 2_con1_I-2	TH pos Sc 3_con1_I-2	TH pos Sc 4_con1_I-2	TH pos Sc 7_con1_I-2	TH pos Sc 8_con1_I-2	TH pos Sc 10_con1_I-2	TH pos NTS Sc 1_con1_C	TH pos NTS SC4_hyp1_I-1	TH pos NTS SC2_hyp3_I-2	TH pos NTS SC10_hyp3_R	TH+ NTS SC7_hyp2_I-2	TH pos NTS SC3_hyp3_I-2	TH+ NTS SC6_hyp2_I-1	TH pos NTS SC6_hyp3_I-2	TH + NTS SC 5_hyp1_R
Cell.Type	TH pos	TH pos	TH pos	TH pos	TH pos	TH pos	TH pos	TH pos	TH pos	TH pos	TH pos	TH pos	TH pos	TH pos	TH pos	TH pos	TH pos	TH pos	TH pos	TH pos	TH pos	TH pos	TH pos	TH pos	TH pos	TH pos	TH pos	TH pos	TH pos	TH pos	TH pos	TH pos	TH pos	TH pos	TH pos	TH pos	TH pos	TH pos	TH pos	TH pos	TH pos	TH pos	TH pos	TH pos	TH pos	TH pos	TH pos	TH pos	TH pos
Preamp.Well.Pos	P5-E5	P5-E8	P5-E10	P5-F10	P5-A8	P5-A9	P5-A10	P5-A11	P5-A12	P5-B1	P5-B2	P5-B3	P5-B4	P5-B5	P5-B11	P5-B12	P5-C1	P5-C2	P5-C5	P5-C6	P5-C8	P5-D1	P5-D10	P5-A8	P5-A9	P5-A10	P5-A11	P5-A12	P5-B1	P5-B2	P5-B3	P5-B4	P5-B5	P5-B11	P5-B12	P5-C1	P5-C2	P5-C5	P5-C6	P5-C8	P5-D1	P1-B12	P3-C10	P3-B4	P2-F3	P3-C11	P2-D2	P3-D2	P1-A5
Sample.Type	single cell	single cell	single cell	single cell	single cell	single cell	single cell	single cell	single cell	single cell	single cell	single cell	single cell	single cell	single cell	single cell	single cell	single cell	single cell	single cell	single cell	single cell	single cell	single cell	single cell	single cell	single cell	single cell	single cell	single cell	single cell	single cell	single cell	single cell	single cell	single cell	single cell	single cell	single cell	single cell	single cell	single cell	single cell	single cell	single cell	single cell	single cell	single cell	single cell
Animal.ID	2509209.con	2509209.con	2509209.con	2509209.con	2485965	2485965	2485965	2485965	2485965	2485965	2485965	2485965	2485965	2485965	2485965	2485965	2485965	2485965	2485965	2485965	2485965	2485965	2485965	2485965	2485965	2485965	2485965	2485965	2485965	2485965	2485965	2485965	2485965	2485965	2485965	2485965	2485965	2485965	2485965	2485965	2485965	2496487	2509212.a	2509212.a	2498971	2509212.a	2498971	2509212.a	2496487
Treatment	Control	Control	Control	Control	Control	Control	Control	Control	Control	Control	Control	Control	Control	Control	Control	Control	Control	Control	Control	Control	Control	Control	Control	Control	Control	Control	Control	Control	Control	Control	Control	Control	Control	Control	Control	Control	Control	Control	Control	Control	Control	PE 1hr	PE 1hr	PE 1hr	PE 1hr	PE 1hr	PE 1hr	PE 1hr	PE 1hr
Anatomical.Region	NTS	NTS	NTS	NTS	NTS	NTS	NTS	NTS	NTS	NTS	NTS	NTS	NTS	NTS	NTS	NTS	NTS	NTS	NTS	NTS	NTS	NTS	NTS	NTS	NTS	NTS	NTS	NTS	NTS	NTS	NTS	NTS	NTS	NTS	NTS	NTS	NTS	NTS	NTS	NTS	NTS	NTS	NTS	NTS	NTS	NTS	NTS	NTS	NTS
Localization	R	R	R	C	R	R	R	R	R	R	R	R	R	R	I2	I2	I2	I2	I2	I2	I2	C	C	R	R	R	R	R	R	R	R	R	R	I2	I2	I2	I2	I2	I2	I2	C	I1	I2	R	I2	I2	I1	I2	R
BM.Chip	1361660213	1361660213	1361660213	1361660213	1361660219	1361660219	1361660219	1361660219	1361660219	1361660219	1361660219	1361660219	1361660219	1361660219	1361660219	1361660219	1361660219	1361660219	1361660219	1361660219	1361660219	1361660219	1361660219	1361660221	1361660221	1361660221	1361660221	1361660221	1361660221	1361660221	1361660221	1361660221	1361660221	1361660221	1361660221	1361660221	1361660221	1361660221	1361660221	1361660221	1361660221	1361660217	1361660219	1361660219	1361660213	1361660219	1361660213	1361660219	1361660217
Cell.mRNA.Expr	TH pos controls	TH pos controls	TH pos controls	TH pos controls	TH pos controls	TH pos controls	TH pos controls	TH pos controls	TH pos controls	TH pos controls	TH pos controls	TH pos controls	TH pos controls	TH pos controls	TH pos controls	TH pos controls	TH pos controls	TH pos controls	TH pos controls	TH pos controls	TH pos controls	TH pos controls	TH pos controls	TH pos controls	TH pos controls	TH pos controls	TH pos controls	TH pos controls	TH pos controls	TH pos controls	TH pos controls	TH pos controls	TH pos controls	TH pos controls	TH pos controls	TH pos controls	TH pos controls	TH pos controls	TH pos controls	TH pos controls	TH pos controls	TH pos no cfos expr	TH pos no cfos expr	TH pos no cfos expr	TH pos no cfos expr	TH pos no cfos expr	TH pos no cfos expr	TH pos no cfos expr	TH pos no cfos expr
Ace	-5.83374	-4.27778	-3.39558	-4.65116	-3.95867	-3.09856	-4.95824	-4.47255	-4.07928	-3.44715	-3.52938	-4.0451	-3.31309	-4.57796	-3.35847	-5.00301	-4.159	-4.24549	-4.73195	-4.78777	-3.36794	NA	NA	-3.50651	-2.44195	-4.65666	-4.16675	-4.18127	-3.12836	-3.91599	-3.82986	-3.83906	-5.12886	-3.88208	-5.13965	-4.18292	-4.43651	-4.44353	-5.48008	-4.16181	NA	-4.37234	-3.05709	-4.68951	-4.06473	-2.07197	-4.48403	-4.08011	-3.37102
Actb	2.03849	2.13697	1.67931	1.48262	2.23735	2.15905	3.01541	2.91335	3.20646	1.75596	1.99181	2.31506	2.28671	2.81544	2.14224	2.25626	2.21594	1.99775	1.62101	1.81454	1.82906	2.16536	2.25511	1.87849	1.71971	2.49023	2.40815	2.7305	2.06117	1.77264	1.81185	2.16118	2.3812	1.77787	1.9168	1.70056	1.7766	1.12181	1.61752	1.68182	2.0221	1.95966	2.2857	2.03551	1.99516	2.29346	1.76404	1.8817	1.58593
Adrbk1	-5.32793	-6.6095	-6.203	-5.50186	-6.08162	-5.49805	-6.00368	-4.68214	-6.12353	-5.18079	-5.36266	-5.29955	-4.84736	-4.64382	-4.14043	-4.83915	-5.17722	-5.00138	-5.25066	-5.3879	-5.23956	-5.81541	-5.5946	-6.53115	-5.36908	-5.90824	-4.81739	-5.84758	-5.14414	-5.77126	-5.2366	-3.03642	-4.34072	-4.72273	-4.77539	-4.81103	-5.74217	-5.18794	-6.19576	-5.75163	-4.97815	-4.83471	-5.8985	-5.01026	NA	-4.80537	-4.45608	-4.52593	-5.57601
Agt	-1.08135	-1.54273	-1.3024	-3.04971	-4.58115	-4.25178	-4.40738	-3.35912	-1.86604	-4.64611	-3.47551	-3.3698	-4.07583	-2.33051	-0.725708	-1.36991	-5.85477	-3.1909	-4.09049	-4.10182	-3.80306	-2.35838	-4.39159	-4.10009	-3.77244	-4.28071	-3.28728	-1.6558	-4.65391	-4.08169	-3.22261	-4.77295	-2.47443	-1.00875	-1.49266	-5.82216	-3.55712	-4.10105	-4.66057	-4.51069	-2.83674	-1.91897	-0.876228	-1.4753	-2.51032	-1.49748	-3.2265	-1.55835	-0.869558
Agtr1a	-4.17584	-3.65327	-3.5679	-2.84591	-4.07748	-3.18445	-3.56743	-6.07728	-4.93589	-5.91124	-4.84686	-7.4815	-6.67672	-5.44585	-0.718819	-3.22	-5.06883	-5.93242	-6.421	-6.31023	-5.36814	-1.29648	-4.09298	-4.20914	-3.24765	-3.64702	-6.41511	-5.19533	-5.79378	-5.82721	-7.51813	-7.9073	-5.76045	-1.08184	-3.24056	-5.19806	-6.86097	-6.27584	-7.45583	-6.35615	-1.6301	-3.62707	-4.8818	-3.74273	-3.68192	-6.37043	-7.13766	-3.80783	-6.11893
Agtrap	-11.9289	-9.88163	-9.90113	-8.73615	-10.2946	-10.7808	-10.8859	-11.8058	-11.7964	-10.3832	-11.2282	-10.2889	-10.0058	-10.5902	-7.27122	-11.5219	-12.0741	-10.4587	-11.7131	-9.84919	-11.711	NA	NA	-9.80416	-10.3013	-11.4403	-12.2784	NA	-10.6761	-10.9927	-10.9024	-9.88971	-10.7915	-7.97959	-11.6492	-12.5833	-10.1019	-11.8209	-9.81669	-12.7665	NA	-10.3927	-11.4222	-9.27725	-11.4277	-9.44643	-8.99632	-9.94281	-10.854
Akt1	-4.62562	-5.65056	-4.69196	-4.85091	-5.16737	-4.78802	-7.18776	-4.31551	-4.50192	-4.27029	-4.37339	-4.41013	-3.11895	-3.80398	-3.95959	-5.17923	-5.27627	-4.92059	-6.1228	-4.50898	-4.65584	NA	-6.37754	-5.05449	-4.73547	-7.44354	-4.05569	-4.77178	-4.32558	-4.76293	-4.6517	-3.71234	-3.7968	-4.57636	-5.12958	-5.21866	-4.34439	-6.3042	-5.09429	-5.09151	NA	-4.59123	-3.43904	-5.58977	-5.77552	-4.2871	-4.43832	-3.30507	-3.87906
Araf	-3.61565	-4.51652	-3.89372	-5.01886	-4.75673	-3.81698	-4.53347	-3.2145	-2.53476	-3.87586	-3.54631	-4.31025	-2.66777	-3.15552	-4.9552	-5.27429	-4.1818	-4.71731	-5.96632	-4.56677	-4.47591	-3.92196	-3.11302	-4.27546	-3.05015	-4.62472	-2.73554	-2.14079	-3.80736	-3.7963	-4.03488	-3.21168	-3.36269	-4.90007	-6.21008	-4.30083	-4.78371	-5.79789	-5.26135	-4.63197	-4.10675	-3.5726	-3.24339	-3.82257	-3.49564	-3.6209	-3.64497	-2.99219	-3.86167
Arrb1	-5.33722	-5.12703	-5.11261	-5.04515	-6.39432	-5.23518	-5.03397	-5.23405	-6.17565	-4.40875	-3.95004	-5.21255	-4.12075	-3.65981	-3.45217	-4.15515	-4.53338	-4.91772	-6.19122	-5.43036	-5.19357	-5.29783	-6.47823	-6.55875	-4.8642	-4.15543	-3.97473	-6.70907	-3.39686	-4.305	-4.98205	-4.77881	-3.73048	-3.65958	-4.68416	-4.09178	-5.32778	-5.33859	-5.3364	-5.77945	-6.48031	-3.73334	-5.02673	-4.44303	-6.51733	-4.68511	-4.4228	-3.65876	-4.23347
Arrb2	-4.38053	-5.55886	-5.23215	-4.69823	-5.57742	-6.28447	-3.78822	-4.09438	-5.22103	-4.33322	-4.54079	-4.83581	-3.74641	-4.16337	-5.10733	-4.09785	-6.3855	-4.61296	-5.33924	-4.49141	-4.96219	-4.38764	-6.09838	-5.30307	-5.78584	-3.70056	-3.82681	-5.21723	-4.2526	-4.62758	-4.50886	-3.91007	-4.18242	-5.3273	-3.80949	-6.27228	-5.06227	-4.86676	-4.92488	-5.47647	-4.59111	-4.23251	-4.57177	-6.12878	-4.9269	-5.1652	-5.08065	-4.3041	-4.73651
Atf2	-2.66586	-2.19566	-2.49219	-3.76357	-3.54332	-2.85787	-3.52402	-2.05682	-2.84475	-2.62855	-2.01547	-2.66151	-1.94317	-1.52058	-3.63593	-2.51259	-2.20784	-2.86788	-3.24967	-2.58183	-2.79875	-5.62648	-4.39177	-2.91064	-2.27319	-3.25663	-1.71418	-2.3243	-2.33477	-2.13483	-2.04738	-1.8258	-1.33877	-3.57905	-2.24474	-1.78048	-2.87466	-2.05429	-2.40825	-3.02144	-5.68872	-2.20493	-1.6885	-3.70534	-3.45498	-2.2319	-2.20561	-1.7653	-2.75782
Cacna1d	-6.3111	-5.20168	-4.97271	NA	-6.0901	-3.24141	-5.09665	-5.13411	-3.27774	-4.81205	-2.55998	-4.57559	-5.15295	-4.84856	-5.34969	-10.5218	-5.1394	-6.1642	-7.26224	-5.70132	-5.89822	-3.72943	-4.63346	-6.18507	-3.05672	-5.13492	-4.9279	-3.28833	-4.36818	-2.82397	-4.29969	-5.42139	-4.78231	-5.78962	-11.1718	-5.50528	-6.64285	-7.51042	-6.17198	-6.2115	-4.40686	-3.78681	-4.19008	-4.28586	-5.84473	-3.9448	-4.06482	-2.61387	-4.29836
Fos	-8.59426	-5.81605	-4.73297	-5.13926	-6.60764	-7.51953	-6.18505	-7.89235	-4.1949	-5.65283	-4.86348	-5.69493	-8.96565	-5.56835	-5.214	NA	NA	-4.31281	-7.71723	-7.6989	-6.75703	-6.63262	NA	-6.10365	-7.52954	-6.46516	-7.28743	-3.84084	-4.20351	-4.61726	-5.80841	-10.3145	-5.98723	-5.79112	NA	NA	-3.76365	-7.57575	-8.21417	-7.43155	-7.10419	-6.84044	-8.54888	NA	NA	-7.47282	NA	-8.30759	NA
Creb1	-6.5647	-8.6536	-8.31793	-5.71561	-8.60986	-8.06484	-6.86496	-8.97827	-6.98215	-7.7523	-8.3764	-7.79718	-9.27157	-7.53973	-5.03162	-8.02166	-7.68829	-7.49293	-8.28801	-6.72572	-8.08547	-6.49181	-6.50449	-7.83351	-7.76671	-7.23892	-8.73403	-7.8037	-9.10647	-9.64664	-8.80151	-10.3133	-7.28109	-5.95064	-8.83445	-7.85469	-8.57282	-8.72779	-8.42851	-8.57649	-6.54262	-8.82578	-7.57013	-8.52711	-10.0115	-8.84497	-9.32093	-7.81035	-8.76515
Crh	-5.01716	-7.65152	-4.78533	-3.04364	-4.98689	-6.05397	-4.19697	-6.76017	NA	-7.32816	-3.7399	-5.73463	NA	NA	-1.57423	-3.76116	-6.28585	NA	-7.7039	-5.54285	-4.74111	-1.26494	-3.85264	-4.65233	-6.02576	-4.33657	-6.8908	NA	-7.52528	-4.08554	-5.64515	NA	NA	-1.88546	-3.91886	-6.29078	NA	-7.02622	-6.31966	-5.18845	-1.96889	-14.5542	-5.68486	-7.87983	NA	NA	-7.61947	-7.46947	NA
Dbh	-1.32494	0.793287	0.75605	-0.839081	0.630239	1.88026	-0.998495	-8.15769	2.90705	1.07361	2.1279	0.800857	-5.79832	0.63601	-7.03356	NA	-1.72457	-3.47291	-0.489878	-1.54311	0.397973	-1.86355	-2.13416	1.17374	2.46876	-0.905038	-7.63648	3.58211	1.57566	1.96731	1.48118	-6.07327	0.394411	-6.62244	NA	-1.24104	-3.77904	-0.00370223	-1.82019	0.338715	-2.11398	1.42067	2.20658	1.21313	0.782809	1.55301	2.36562	1.72208	1.37144
Dusp6	-6.10708	-5.51005	-4.93962	-7.0131	-5.70346	-4.71604	-5.1376	NA	-5.86242	-7.89616	-4.7954	-9.3106	-8.52425	-5.49323	NA	NA	-6.50492	-7.11673	-6.02687	-7.20332	NA	NA	NA	-4.80902	-4.13944	-5.44269	NA	-5.2552	-7.77443	-4.71608	-8.08948	-8.09686	-5.04873	NA	NA	-6.35863	-7.06866	-6.18626	-7.68985	NA	NA	NA	-3.89733	-11.1716	-5.67242	-5.83256	-8.08914	-5.12018	-4.86419
Egr1	-3.623	-5.22683	-1.07131	-0.652242	-4.57906	-2.32512	-3.31723	-3.0004	-1.75207	-1.86147	-1.2551	-2.07987	-4.96421	-0.742615	-2.11923	NA	-5.73516	-2.34927	-3.34469	-4.41034	-3.36001	NA	NA	-4.07211	-1.62466	-3.07452	-2.32937	-1.18191	-1.10837	-1.36439	-1.37064	-5.25188	-0.783582	-1.98722	NA	-5.21112	-2.35825	-2.77494	-4.44007	-3.56269	NA	-1.13	-1.72572	-3.18083	-5.36379	-3.8603	-3.82275	-3.48222	-3.53079
Elk1	-7.01111	-5.93522	-6.98683	-4.05346	-6.9479	-5.39483	-6.10179	-7.14346	-7.28884	-4.74121	-4.82894	-5.40188	-5.19622	-8.08228	-4.44278	-5.60311	-6.43024	-5.304	-5.23393	-4.07803	-5.23228	-6.11537	NA	-6.30703	-5.22411	-6.46904	-6.79432	-6.68605	-4.52562	-4.86492	-4.88692	-5.09758	-7.51375	-4.05428	-5.05289	-5.4326	-5.4579	-4.33382	-4.45065	-5.80457	-5.55759	-4.82935	-5.86389	-5.31851	-5.16686	-6.80803	-5.42877	-4.13609	-5.31897
Fosl1	-5.94474	-6.41188	-7.7715	-7.20251	-9.52091	-6.53496	-7.05099	-9.45683	NA	-7.00544	-6.93309	-7.16221	NA	-8.97671	NA	-7.45736	-8.67145	NA	-8.43791	-8.88237	-6.81277	NA	NA	-7.64092	-6.1486	-6.70636	-8.42241	NA	-6.71804	-6.18667	-6.6198	NA	-8.2936	NA	-7.42775	-8.32766	NA	-8.05264	-9.14182	-6.40482	NA	NA	-7.59408	-6.44287	-6.75973	-7.04562	-6.92206	-9.38008	-5.83875
Gabra1	-3.6153	-5.35794	-4.23252	-2.66166	-7.47988	-7.47301	NA	-0.939096	NA	-5.40314	-4.72067	-1.73367	0.362555	-1.34145	-2.94959	-2.31622	-2.51304	-1.12402	-5.41206	-1.42807	-2.1145	-4.94266	-0.263132	-7.06547	-6.67933	NA	-0.658689	NA	-5.38791	-4.94754	-1.21189	-0.44586	-1.02081	-3.05347	-2.18011	-2.16969	-1.99932	-4.99144	-1.63807	-2.42204	-4.6667	-5.13813	-3.34729	-6.34776	-5.96159	-4.92949	-4.75894	-5.91565	-7.25499
Gabra2	-3.21787	-3.27113	-2.80902	-3.90065	-5.14605	-4.47954	-5.2165	-3.63732	-4.77229	-3.65275	-2.46819	-3.96572	-2.97033	-1.64915	-2.7658	-2.64758	-4.35972	-3.02871	-4.28537	-3.90314	-4.38064	-4.83115	-2.20112	-4.40431	-3.66578	-5.01142	-3.05239	-4.1979	-3.33104	-2.51989	-3.39345	-3.16782	-1.29994	-2.72622	-2.67091	-3.97443	-3.01898	-3.64046	-4.21687	-4.39723	-5.07057	-1.20275	-2.4272	-5.94204	-5.92983	-4.55319	-3.28043	-3.32689	-3.89029
Gabra4	-6.36397	-6.03149	-6.63245	-6.19251	-7.88907	-6.71537	-7.27061	-4.78834	-7.2256	-7.71664	-4.63715	-4.27906	-3.73571	-4.72858	-5.00789	-6.72422	-4.89362	-4.60445	-5.94634	-4.94304	-5.6766	NA	-5.40155	-7.90155	-7.28093	-8.04319	-4.90204	-7.44758	-8.60366	-5.23291	-4.807	-5.00219	-5.09324	-5.43113	-6.85887	-4.92889	-4.80851	-6.79701	-5.5496	-6.53553	NA	-5.33155	-5.58239	-7.06712	NA	-7.77929	-5.6615	-5.05101	NA
Gabrq	-2.18182	-3.4059	-3.19435	-4.41826	-5.17224	-2.77771	-3.69054	-4.97815	-2.85674	-3.29959	-2.12057	-4.47913	-3.55517	-3.08748	-6.10342	NA	-4.63636	-5.20388	-3.48256	-5.24472	-4.65836	NA	-6.01588	-4.96639	-2.31392	-3.55994	-5.01426	-2.49778	-3.26614	-2.7222	-4.26557	-4.23088	-2.81613	-6.17945	NA	-4.76077	-5.42814	-3.21306	-5.73715	-5.27002	NA	-2.65857	-1.47472	-2.74531	-5.10074	-2.13169	-3.26025	-2.06899	-4.1466
Gad1	NA	-8.63947	-2.73506	-6.27834	-4.92788	NA	NA	NA	NA	-8.07827	-5.32071	NA	-9.11508	-1.84326	-7.61145	NA	NA	-4.12274	-6.45025	NA	-5.62257	-5.65091	NA	-4.85539	NA	NA	NA	NA	-7.99677	-5.4383	NA	-9.54022	-2.25903	-7.99659	NA	NA	-4.66714	-6.21625	NA	-6.13024	-5.95514	-3.36512	-8.57718	-8.0125	-6.26322	-5.9319	-7.63525	-5.22509	-8.0902
Gal	-8.65214	-6.25786	-8.0593	-5.14422	-8.30809	-5.65078	-6.61794	-9.1486	NA	NA	-6.81701	-5.52942	NA	-9.44434	-4.86967	-4.5595	-15.4124	-7.43973	NA	-7.70539	-8.24844	-11.0673	-6.10951	-8.32159	-5.10813	-6.35357	-9.3981	NA	NA	-7.29065	-5.24488	NA	-9.1873	-4.53014	-4.30426	-15.2246	-7.38996	NA	-7.86323	-7.98623	-10.7703	-1.42223	-8.23514	-6.03924	-3.55385	-8.25069	NA	-3.42777	-7.71645
Gria2	-5.15074	-5.21933	-6.70819	-5.03918	-6.80091	-6.62662	-4.99395	-8.13205	-7.4175	-6.17061	-4.06446	-7.14542	-6.31306	-7.22623	-4.75408	NA	-7.48147	-7.86809	-7.00167	-6.48316	-6.58313	-8.76017	-6.88627	-6.41932	-5.66444	-4.03415	-7.52208	-6.59988	-5.86834	-4.49651	-6.03973	-5.18988	-6.08724	-4.22912	NA	-6.49248	-7.67496	-6.23642	-6.27902	-6.46287	-7.72406	-5.59949	-4.2955	-5.80114	-3.68929	-4.92889	-3.72363	-4.36159	-5.38924
Gria3	-11.0942	-8.04794	-8.83142	NA	-11.3458	-8.4997	-6.80653	-13.2873	-12.0732	-8.14245	-6.06048	-8.69322	NA	-9.04423	-8.76133	NA	NA	-11.285	-8.26137	-12.7372	-10.1298	NA	NA	-10.5159	-7.7301	-5.84158	-10.8947	-11.221	-7.3586	-6.02449	-7.74708	NA	-7.91377	-7.82554	NA	-15.5781	-10.5944	-7.16206	-11.9402	-9.82647	NA	-8.53515	-6.98116	-8.42019	-6.8027	-7.01339	-6.51772	-7.44082	-7.43484
Grin1	-6.65437	-6.27116	-4.35813	-6.56469	-6.56681	-4.2977	-4.47989	-2.38245	-5.74331	-4.59177	-7.13087	-3.23812	-2.03009	-3.31534	-5.6645	-4.4949	-3.73619	-4.86215	-5.60694	-3.75747	-4.85448	NA	-3.58537	-6.39729	-3.77521	-3.42179	-2.3169	-5.78755	-4.3207	-7.59218	-2.91884	-2.50762	-3.25122	-5.7035	-4.5946	-3.67997	-5.27454	-4.90094	-3.98756	-5.17734	NA	-3.83	-4.13201	-8.14024	NA	-3.54731	-5.03647	-3.53857	-4.07961
Grin2a	-4.70544	-4.77049	-5.74687	-4.30056	-5.15899	-5.89083	-5.84933	-5.79594	-4.31278	-5.48051	-3.22043	-5.26155	-5.12941	-5.1422	-3.53619	-7.43556	-5.82129	-5.15	-5.08205	-5.45968	-5.14052	-4.47677	-5.45939	-5.11324	-5.74471	-5.45302	-5.71128	-4.37521	-5.30744	-3.35828	-5.4716	-6.23939	-5.04846	-3.88329	-7.38162	-5.8886	-5.47966	-4.67954	-6.01249	-5.53454	-5.52424	-3.13935	-4.51875	-4.50576	-5.97769	-5.312	-4.71437	-4.17193	-5.44642
Grin2b	-6.27943	-4.35188	-4.82817	-6.27492	-5.80546	-4.92491	-4.05589	-6.2185	-5.44904	-5.16507	-2.49037	-4.8419	-5.98557	-3.90222	-5.38232	-5.31585	-4.38091	-3.62169	-4.92295	-5.04851	-4.74961	NA	-4.23068	-5.40683	-4.43894	-3.15221	-5.6285	-5.4054	-4.81599	-2.73626	-4.39574	-5.96541	-3.5497	-5.28248	-5.02974	-4.23597	-4.08582	-4.47739	-5.24844	-4.77681	NA	-2.92833	-4.2074	-5.52907	NA	-3.9623	-4.3592	-3.88636	-3.54615
Grin2c	-7.78848	-8.22709	-8.79644	NA	-12.0158	NA	NA	-10.6966	-5.90339	-9.82611	-9.02444	-6.31547	NA	-5.39102	-4.33199	-7.63249	-9.67608	-7.80811	-5.94031	-6.10639	NA	-4.50408	-7.4315	-11.8941	NA	NA	-10.7369	-6.30918	-10.0618	-9.08487	-7.50209	NA	-5.89523	-3.9673	-7.25347	-9.3967	-7.88776	-6.33675	-6.70702	NA	-4.5087	-8.3956	-6.55283	-6.99502	-5.40728	-9.42558	-7.41058	-7.36337	-4.80972
Grk5	NA	-7.00697	-5.87134	-3.50352	-5.53414	-6.77495	-4.97665	-6.74004	NA	-5.64693	-5.28199	-7.54699	-4.4666	-7.32493	-3.53797	-5.83569	-5.66774	-5.18278	-8.69346	-5.6985	-7.58139	-3.39959	-1.86078	-4.75124	-6.18738	-4.57823	-6.56687	NA	-5.05777	-5.45563	-6.95933	-4.26316	-6.7263	-3.67428	-5.50724	-5.40932	-5.64498	-7.82508	-5.55192	-7.82049	-3.81892	-6.18506	-6.01774	-6.48444	-5.40942	-4.60182	-6.17892	-5.74877	-7.03711
Hcn2	-3.9783	-2.34606	-2.90735	-2.89518	-3.7045	-2.48549	-3.53926	-2.46525	-2.84362	-2.31447	-2.53964	-3.29174	-1.64125	-0.677964	-2.32406	-2.57953	-3.14584	-1.80125	-3.13264	-1.81969	-2.83878	0.666511	-0.0616919	-3.10325	-1.60837	-3.15123	-1.48971	-2.04035	-1.92577	-2.55513	-2.76397	-1.45566	-0.398376	-2.16181	-2.29106	-2.48087	-2.09786	-2.06146	-1.63772	-2.56577	0.557885	-2.21401	-0.916991	-2.64801	-1.96175	-2.15192	-2.22711	-2.84768	-1.62824
Hprt1	-0.229244	-0.272392	0.196239	-0.92603	-1.70766	-1.16181	-1.62009	-0.410843	0.235127	-1.49206	-0.370334	-0.896049	-0.293274	-0.0854003	-1.42788	-0.470485	-1.42939	-0.699758	-1.3344	-0.970242	-0.713457	-4.05997	-3.16955	-1.03817	-0.377789	-0.937126	0.0806609	0.936677	-1.19383	-0.311329	-0.315069	-0.495093	-0.0574775	-1.45484	-0.307101	-0.960574	-0.930632	-0.255069	-0.877132	-0.677594	-4.53202	-0.998393	-0.381996	-1.77186	-0.800157	-0.894132	-0.631686	-0.208227	-1.25482
Hras	-3.84423	-4.45187	-4.20214	-2.71771	-4.23996	-4.40021	-2.97757	-6.28519	-5.61529	-8.44471	-5.87746	-8.40827	-5.39122	NA	-0.537644	-4.11921	-6.92265	-9.24904	-6.77371	-7.31489	-5.81078	-0.981814	-3.56489	-4.04521	-3.9863	-3.19205	-5.8066	-5.06696	-8.35555	-5.67039	-7.81182	-5.5046	NA	-0.777346	-3.82676	-7.05141	-8.76703	-6.16617	-7.4874	-6.08669	-1.2953	-6.82337	-5.50402	-5.13473	-5.93613	NA	-6.72311	NA	-7.00092
Itpr1	-7.61897	-6.27723	-6.7087	-8.33248	-4.68262	-4.30065	-5.94933	-7.38755	-5.96073	-6.264	-4.39016	-6.09196	-6.66536	-4.63812	-4.76168	-6.13554	-5.46645	-4.82132	-6.66832	-6.3638	NA	NA	-6.33314	-4.81659	-4.40202	-5.93516	-7.43165	-5.23946	-6.40932	-4.55042	-6.12358	-7.86898	-5.08758	-5.1603	-6.38281	-5.38607	-5.43419	-6.22524	-6.96452	NA	NA	-7.00483	-5.02728	-7.54258	-7.09596	-4.50094	-10.3785	-5.7131	-4.54312
Jun	-3.46443	-3.39081	-2.54922	-1.24424	-2.36733	-2.80684	-2.33037	-2.62961	-3.16203	-1.98593	-0.927671	-3.26485	-2.1665	-2.87007	-0.793702	-2.62788	-3.98082	-3.30495	-4.41952	-4.14741	-3.55042	-0.35791	-0.534618	-1.4656	-2.50269	-3.13633	-2.6385	-3.20433	-1.98707	-1.57481	-2.78492	-3.25085	-2.87696	-0.680188	-2.6428	-3.78574	-3.70861	-3.86315	-4.55069	-3.72383	-0.451846	-2.80663	-1.06125	-2.69762	-3.44898	-1.64187	-2.84674	-1.02494	-2.95164
Junb	-2.93523	-4.3077	-3.36663	-1.05907	-2.58017	-2.67633	-2.46686	-6.21385	-5.62645	-2.57417	-2.55606	-3.93825	-4.58455	-4.49255	-0.363245	-3.41113	-4.81275	-3.82803	-4.77087	-4.42005	-5.30404	-0.644333	-4.02175	-2.2852	-2.56064	-2.60904	-6.96719	-5.87452	-2.90162	-2.70432	-3.03067	-5.53944	-4.53627	-0.514376	-3.38486	-4.24812	-3.70149	-4.73942	-4.56133	-4.82566	-1.56467	-3.19353	-4.4043	-3.35357	-6.74941	-4.19644	-5.50546	-4.36274	-4.75887
Jund	-1.24062	-1.55356	-0.839221	-0.474193	-1.43068	-0.564368	-0.111695	-1.0517	0.28605	-1.24854	-0.0341156	-1.13876	-0.329638	-0.853613	0.27879	-1.07142	-1.19581	-1.62019	-1.86216	-1.00889	-1.22265	1.4418	1.75712	-0.306496	-0.635824	-0.167983	-0.789877	0.360309	-0.817795	0.0176641	-0.875992	-0.943459	-1.28072	0.0387818	-1.47219	-1.34435	-1.98109	-1.58816	-1.87969	-1.4766	0.682755	-1.3001	0.149859	0.479926	-1.27173	-1.03636	-1.16733	-0.284221	-1.08039
Kcnj2	-9.68196	-4.96964	-3.16025	-0.602914	-4.37574	-5.19855	-2.88888	-5.74167	-6.1088	-5.5399	-8.04693	-5.61834	NA	-7.21048	-1.10985	-4.91118	-6.18118	-6.36934	-7.02092	-7.3499	NA	-1.59513	-4.37906	-3.51937	-4.2408	-1.7014	-4.41554	-5.21489	-4.54908	-7.7054	-5.11575	NA	-6.51401	-0.361747	-4.30971	-5.53542	-5.66435	-6.27753	-6.93594	NA	-0.973569	-5.18449	-5.52595	-5.67098	-5.93688	-7.44331	-3.92291	-6.2692	-7.45484
Map2k1	-3.72928	-3.91249	-3.68694	-4.65265	-4.04728	-3.20995	-4.09209	-2.74484	-2.58776	-3.40038	-3.46318	-2.87856	-2.81194	-2.80829	-4.25177	-3.94116	-3.86459	-3.15602	-4.98307	-4.03625	-4.90252	-5.8215	-3.05625	-3.68997	-2.68394	-3.44217	-2.57396	-2.52488	-2.93201	-3.41077	-2.50134	-3.01236	-2.46541	-4.25951	-3.98502	-3.80599	-3.94486	-4.68304	-4.24056	-4.95852	-6.00392	-3.59525	-2.57985	-3.43703	-4.69646	-2.80364	-3.01684	-3.00957	-3.4741
Map2k7	-4.56111	-4.95629	-4.84621	-4.68578	-5.32108	-4.78423	-3.23825	-4.07563	-4.15553	-5.02815	-3.18092	-4.97253	-3.53029	-3.80101	-4.51785	-4.84778	-5.24058	-6.19097	-3.91203	-3.76637	-4.79128	-3.74915	NA	-5.12477	-4.25795	-3.19825	-4.0722	-4.02266	-5.05326	-3.45145	-4.60263	-3.58689	-3.4576	-4.51277	-5.40047	-5.03334	-6.63635	-3.43858	-4.26694	-5.0224	-3.7627	-4.87977	-2.72549	-5.31991	-4.34582	-4.57311	-3.90139	-4.4367	-4.33865
Map3k11	-6.61578	-6.58594	-6.89322	-4.97537	-6.34465	-7.309	-5.34685	-8.0873	-8.01291	-6.29187	-5.91297	-7.56077	-7.7617	-8.0734	-4.0795	-6.29395	-9.93565	-6.45587	-7.73868	-5.99278	-8.92002	-3.38992	-3.88296	-5.93309	-6.91817	-4.62406	-7.88854	-8.41923	-6.38738	-6.04849	-7.49044	-8.17943	-8.45022	-4.26031	-6.38954	-9.23764	-6.98935	-7.61106	-6.94102	-9.13455	-4.14293	-9.36336	-4.05068	-4.78897	-4.79241	-6.03075	-7.17359	-6.22475	-7.2415
Map3k12	-4.36216	-3.15041	-3.72928	-3.56915	-4.63486	-3.47792	-4.97962	-2.94676	-3.97868	-3.75076	-2.67198	-3.13222	-2.12923	-2.56311	-1.84447	-4.80858	-3.43001	-4.7899	-4.38751	-3.23913	-4.76478	-1.18485	-0.877498	-4.46291	-3.11662	-4.6428	-2.61914	-3.46777	-3.56086	-2.5967	-3.06771	-2.88559	-2.92856	-2.18632	-4.86673	-3.46486	-5.42039	-4.00044	-4.05585	-4.59864	-1.72095	-3.31756	-3.73234	-3.45745	-4.62748	-3.75303	-3.37965	-2.81324	-3.32031
Mapk1	-3.6105	-2.32406	-3.03871	-1.9743	-3.47238	-2.90941	-2.85198	-1.69443	-3.24992	-2.72527	-2.5377	-3.04315	-1.28328	-1.79469	-2.3481	-2.22173	-2.21218	-1.69735	-3.48348	-2.24517	-2.98464	-11.0088	NA	-3.21262	-2.43576	-2.55341	-1.48333	-2.76429	-2.19232	-2.33394	-2.66105	-0.403239	-1.26926	-2.11112	-2.04757	-2.03849	-2.52707	-3.27415	-2.72253	-3.04269	-10.4649	-1.58388	-1.00357	-2.92911	-3.16969	-1.88859	-0.465162	-1.58712	-2.11127
Mapk3	-4.73589	-4.92744	-4.57695	-4.67136	-5.8645	-4.45025	-3.49565	-3.5424	-5.71939	-4.80279	-3.98062	-4.2313	-2.34333	-4.6397	-3.94487	-2.92327	-3.61077	-3.17583	-3.94486	-2.32888	-2.98759	-5.67933	-4.63085	-5.18762	-4.37033	-4.09944	-3.36226	-4.79112	-4.16103	-3.92883	-2.52351	-2.24448	-4.79798	-3.21043	-3.18862	-3.1843	-3.36782	-3.37702	-0.719054	-3.43072	-5.99812	-6.11544	-2.60799	-5.04846	-2.9669	-4.72008	-3.38139	-3.84581	-4.63076
Mapk7	-6.54674	-8.39929	-8.05855	-7.09364	-6.67295	-7.47064	-6.83435	-5.4574	-7.16284	-6.35511	-5.35956	-7.24649	-5.06898	-8.20245	-6.92817	-5.1805	-7.45317	-6.44529	-5.779	-6.24794	NA	-5.39319	-5.63369	-6.60864	-7.13533	-6.75202	-5.11055	-7.35151	-6.31475	-5.66607	-7.24524	-5.65889	-7.92938	-7.28248	-5.34639	-7.27027	-6.78562	-5.52332	-6.79505	NA	-5.68462	-6.94047	-7.73057	-6.33241	-6.56983	-6.78145	-7.00717	-6.98871	-7.75025
Npy	-3.44127	-1.49139	-3.62551	-0.943511	-4.48279	-5.87587	-3.07598	-6.38977	-6.04992	-5.87266	-5.46438	-7.47133	-5.39423	-6.60964	0.138517	-1.78028	-5.42565	-5.81134	-7.48549	-5.05692	-4.80581	-1.82052	-4.87734	-3.6592	-5.82929	-2.67241	-6.0871	-6.36174	-5.64357	-5.66193	-7.80389	-6.41784	-6.55319	-0.219679	-1.78254	-5.19128	-5.6435	-7.44599	-6.03527	-5.32863	-2.75628	-6.5867	-5.53597	-3.9423	-5.10496	-3.14239	-6.96973	-1.53274	NA
Npy1r	-4.20254	-5.192	-3.41486	-1.54233	-2.90934	-4.47317	-2.45948	NA	NA	-4.19794	-5.08701	-6.99538	NA	-1.79221	-0.573427	-2.82606	-4.53957	-4.07225	-5.10467	-4.22687	-5.66287	-0.950915	-3.80144	-1.61052	-3.42204	-2.84968	NA	NA	-4.27904	-5.48238	-6.87549	NA	-2.04183	-0.926693	-2.80482	-4.69581	-4.54634	-4.62074	-4.81762	-5.91749	-1.63418	-5.12002	-4.221	-4.39085	-5.061	-5.41468	-5.62984	-4.78295	-5.01945
Pak1	-3.08613	-3.50444	-2.40465	-3.78332	-3.65896	-2.66192	-5.39777	-2.74322	-1.77834	-2.71671	-2.26824	-2.79877	-2.06657	-1.21616	-1.84593	-2.7383	-3.76447	-2.9151	-3.62149	-3.35961	-3.46354	-3.51216	-2.85386	-3.2886	-2.44798	-5.00365	-2.70619	-1.51528	-2.83881	-2.78575	-2.76325	-2.96278	-1.41838	-2.11704	-2.85168	-3.95647	-3.00427	-2.98182	-3.70276	-3.66397	-4.3708	-2.18812	-1.8319	-2.55469	-3.34007	-2.02912	-3.10776	-1.89899	-2.902
Pdpk1	-5.16839	-3.68941	-3.1733	-3.73417	-4.72547	-4.27037	-3.89803	-2.79835	-5.18146	-3.42645	-2.31622	-3.13844	-1.6514	-2.58223	-3.91191	-1.69489	-2.50089	-2.57246	-3.67409	-2.38819	-2.99938	-6.43171	-4.52818	-4.28871	-3.98983	-3.70204	-2.36587	-4.57319	-3.08543	-2.4557	-2.85841	-2.18947	-2.23569	-3.73368	-1.42846	-2.16213	-2.89472	-3.17858	-2.48043	-3.16606	-5.97409	-2.64109	-2.91534	-3.25871	-3.24902	-2.87304	-3.09438	-2.49799	-2.61956
Pebp1	-0.50046	-1.5216	-0.791271	-1.34735	-0.956761	-0.621056	-1.19767	0.81208	0.777053	-0.250125	-0.451652	-0.810487	0.46855	0.965297	-0.00600417	-0.742053	-0.860672	-0.15884	-1.72601	-1.02275	-0.865853	0.618117	1.88133	-1.11741	-0.115381	-0.755679	1.14454	1.59573	-0.0186407	-0.792017	-0.262703	0.335308	1.03507	-0.0918847	-0.455979	-1.15527	-0.35506	-1.58535	-0.975878	-1.11972	0.683563	0.321804	-0.591193	-1.31326	-0.43745	-1.12663	-0.663602	0.0162894	-1.22887
Phox2b	-3.42472	-4.31589	-4.32778	-4.22323	-3.50267	-3.265	-3.53125	-2.60123	-2.07517	-3.18248	-2.22923	-3.00623	-2.032	-4.49146	-5.49027	-3.90325	-4.13426	-4.4314	-6.46906	-3.93488	-4.35248	-2.62813	-0.397201	-2.93964	-2.40144	-3.14823	-1.74247	-1.29279	-2.92766	-2.22007	-2.78066	-2.11058	-3.91808	-5.64319	-3.87969	-3.75219	-4.7433	-5.74202	-4.00107	-4.05278	-2.89861	-4.16402	-1.86782	-1.9294	-4.18125	-2.66699	-2.98209	-2.9372	-1.69725
Pik3r3	-4.76248	-4.55723	-3.40266	-3.81338	-4.59607	-4.0074	-4.01436	-4.3259	-3.60684	-4.68239	-4.58164	-4.4451	-3.21909	-3.29016	-2.87202	-3.59539	-3.69498	-3.357	-4.49673	-3.05759	-4.05354	-5.47996	-4.20846	-4.25048	-3.09363	-3.88854	-3.40138	-3.35125	-4.4636	-4.39207	-4.1622	-3.54038	-2.79847	-2.1006	-3.84804	-3.53633	-3.70429	-4.06811	-3.19737	-4.12032	-5.8706	-5.1526	-2.71279	-3.5627	-6.4248	-3.28164	-3.33174	-3.91608	-4.44392
Prkca	-14.5744	-12.4533	NA	-12.4791	-15.1763	NA	-12.9113	-17.6209	NA	-13.7842	-13.2674	-17.2455	NA	NA	-15.3077	-13.8656	NA	-12.067	-12.5161	-11.4675	-13.595	NA	NA	-13.0822	-14.4662	-9.67248	-14.0508	NA	-12.5858	-11.1363	-13.7115	-13.422	-13.6737	-12.2822	-11.4713	-14.2485	-12.1852	-10.6093	-10.1485	-11.9629	NA	-16.769	-14.5574	-15.0201	NA	-13.4055	-10.838	-16.8213	-11.8511
Plcb1	-6.91478	-5.32483	-6.05562	-3.16465	-7.36153	-9.55363	-5.18831	-7.66064	-14.9039	-7.41076	-5.56705	-6.34703	-7.50669	-6.201	-4.70475	-6.94043	-7.87221	-8.31214	-8.02117	-5.71838	-6.30975	-11.1444	-7.29286	-6.63418	-8.66789	-4.25387	-6.4605	-9.55576	-7.06467	-4.90527	-5.92309	-5.7476	-4.54171	-3.80971	-5.95669	-7.09688	-8.39387	-6.66716	-5.20289	-5.884	-9.25897	-6.35001	-6.96714	-6.06311	-4.75528	-6.86947	-4.61057	-6.27301	-9.50114
Ppp1cb	-3.61451	-3.8017	-3.22971	-3.91914	-4.06525	-3.7408	-5.1338	-3.65901	-4.39526	-4.509	-3.58275	-3.8221	-3.52575	-3.16596	-2.66391	-3.52512	-3.93116	-3.87333	-4.97602	-3.91272	-3.98951	-3.31927	-3.17243	-3.63207	-3.3497	-4.47049	-2.69946	-3.88307	-4.11537	-3.11513	-3.5673	-3.26514	-1.93226	-2.50421	-3.41121	-3.62162	-3.97711	-4.16538	-3.83877	-4.188	-3.51828	-3.78179	-3.41616	-3.73421	-4.76016	-3.35536	-4.16156	-3.92685	-4.08354
Ppp1cc	-4.47581	-5.81849	-4.76654	-4.98784	-7.89482	-5.33004	NA	-4.44943	-5.13201	-5.14916	-4.86043	-5.64481	-5.71922	-4.42505	-3.4417	-3.59343	-3.89514	-5.00499	-5.46009	-5.62268	-5.29866	-7.48246	-4.34317	-7.43323	-4.95215	NA	-3.89494	-4.22304	-4.62575	-4.74019	-5.56256	-6.70608	-4.48289	-3.23427	-4.10513	-4.0782	-4.82796	-4.94056	-5.35531	-5.6937	-6.94894	-7.04848	-4.61568	-5.79864	-6.27149	-6.03025	-5.48802	-5.83291	-5.48844
Ppp2r1a	0.322311	-0.392911	-0.335783	-1.35855	-1.53107	-0.739691	-1.40836	0.052532	0.738108	-0.722504	-0.404384	-0.234457	0.894656	1.30839	-0.759851	0.222759	-1.01648	-0.053003	-1.86101	-0.311693	-0.359061	-1.37199	1.59891	-0.985482	-0.260582	-1.32239	0.294529	1.19402	-0.57092	-0.268877	0.196094	0.404112	1.46222	-1.1169	0.135808	-1.02967	-0.370677	-1.04194	-0.510988	-0.66957	-1.95147	0.25206	0.456788	-0.374409	-0.786634	0.393531	-0.369037	0.16119	-0.927698
Ppp5c	-3.95481	-2.42902	-3.99386	-3.44875	-4.64887	-3.53449	-5.46512	-3.59456	-2.9148	-3.40741	-3.39147	-3.67155	-4.16816	-3.40607	-4.01722	-4.14572	-3.52103	-3.68491	-4.81369	-3.95634	-3.7224	-4.35049	-2.90193	-3.87593	-2.85915	-4.082	-2.45805	-1.42432	-2.55835	-2.62528	-2.90246	-3.0501	-1.90468	-2.91552	-3.56858	-2.5572	-3.64082	-3.52338	-3.542	-3.23326	-3.27561	-4.65567	-3.36961	-4.16957	-2.56723	-3.85122	-2.53398	-3.66924	-2.7721
Prkce	-3.86347	-4.39698	-3.45318	-4.00397	-5.33122	-4.06404	-7.96919	-3.79564	-5.13923	-5.21603	-3.32852	-4.01167	-3.13077	-2.52392	-2.89817	-2.53249	-3.92408	-3.51907	-3.81531	-3.39036	-4.18823	-3.11701	-2.74346	-5.12325	-3.72862	-7.7305	-3.47308	-5.05015	-5.36155	-3.01688	-4.4014	-4.33131	-2.47582	-3.1447	-2.79921	-4.09842	-3.9802	-3.20691	-4.81752	-4.32805	-3.74147	-3.63584	-3.18719	-4.05352	-5.10378	-3.96878	-4.79787	-2.8084	-5.0722
Ptpn1	-6.93987	-7.17771	-5.63716	-5.15789	-7.60167	NA	-6.28025	-7.64431	NA	-7.28313	-5.03079	-5.5978	-7.8867	-7.46904	-5.65977	NA	-6.43821	NA	NA	-7.03051	-7.13988	-12.0609	NA	-7.27608	NA	-6.06401	-7.4257	NA	-7.08763	-5.25715	-5.38949	-8.03497	-6.79495	-5.69563	NA	-6.3173	NA	NA	-7.03839	-7.70169	-12.3598	-13.0612	-6.13202	NA	-5.97728	-6.97449	-7.50859	-6.25088	NA
Ptpn2	NA	NA	-7.75871	NA	-7.67019	-9.48791	-6.79199	NA	-6.64055	-10.9494	-7.56886	-8.95975	-9.85393	NA	-6.99538	-11.6688	-7.53216	-9.54638	NA	-8.10158	-8.96219	NA	NA	-7.88672	-9.11753	-6.85421	NA	-6.49174	-11.4508	-7.80612	-9.21539	-10.3501	NA	-7.60461	-12.4874	-7.96958	-9.95096	NA	-9.01743	-9.82341	NA	NA	NA	-8.25018	-8.26889	NA	-8.21487	-8.24837	-8.07178
Raf1	-9.67079	-9.10052	-8.87594	-10.1287	-10.2469	-9.63044	-10.9915	-11.2058	-14.9989	-9.59136	-11.4528	-9.97547	-12.9284	-12.9738	-9.99993	-12.1111	-11.195	-11.6708	-15.6663	-10.6073	-10.7184	-16.9808	-11.4159	-9.30765	-8.42012	-9.0908	-9.91172	-10.0479	-8.96303	-10.5949	-9.00082	-7.8999	-9.64085	-7.84	-10.5571	-10.191	-11.9078	-12.5727	-9.04006	-9.96063	-11.7635	-9.45016	-9.59868	-10.697	-7.94613	-10.3152	-7.83501	-10.0943	-8.29467
Rasa1	-6.13933	-5.91705	-6.28034	-5.43217	-6.02585	-5.56355	-5.69646	-5.20335	-7.86956	-5.78767	-4.78361	-4.65595	-4.75808	-4.71442	-5.27351	-5.84217	-5.6776	-5.62474	-6.58986	-5.04171	-5.05574	-8.66024	-6.18019	-5.37308	-5.50567	-4.9185	-4.59579	-8.33213	-5.22167	-4.44986	-5.12036	-4.43558	-4.84259	-5.10426	-5.09316	-5.22038	-5.81686	-5.88647	-4.56144	-5.08028	-9.20705	-6.90155	-5.63655	-6.34295	-5.45234	-6.09398	-4.18461	-5.49908	-5.46669
Rasgrf1	-7.26761	-5.24081	-5.48966	-3.12968	-4.24737	-5.35282	-5.66435	NA	-5.79388	-7.21347	-6.06592	-6.93929	-8.01396	-4.64243	-2.0643	-3.02847	-5.49328	-6.65855	-6.41102	-7.8117	-7.01932	-2.76204	-5.88155	-4.67214	-4.56147	-4.22304	NA	-6.13281	-6.32324	-6.99551	-7.20296	-8.73085	-5.0515	-1.65407	-4.31451	-5.66985	-5.98986	-6.21887	-8.51923	-7.85883	-3.08896	-8.13204	-6.2318	-7.67812	NA	-6.11063	-6.8214	-6.95191	NA
Rasgrf2	-6.97796	-6.01911	-4.5936	-4.16377	-5.4808	-4.93284	NA	-4.51235	-6.01795	-4.48888	-4.80497	-3.95267	-3.39263	-4.03369	-2.83229	-4.93569	-4.15371	-4.07177	-5.09082	-5.37532	-3.83695	-4.78435	-3.94027	-5.46862	-4.50109	NA	-4.59373	-5.90645	-4.57529	-5.50202	-3.79131	-3.73615	-3.84628	-3.10535	-5.54112	-3.66864	-4.36713	-5.12168	-6.10355	-4.54668	-4.74726	-6.21866	-3.00191	-6.54469	-4.64942	-4.20948	-5.00921	-4.20254	-4.63822
Rasgrp1	-2.9208	-3.73472	-3.31414	-4.4409	-4.99433	-2.77225	-2.51266	-3.96484	-2.49764	-4.68879	-3.47242	-2.69515	-1.92528	-3.01456	-3.00401	-2.58257	-3.54131	-3.80474	-3.22235	-2.77881	-3.00279	-5.30676	-3.78122	-4.93349	-2.32003	-3.03201	-4.51697	-2.13139	-4.67268	-3.58461	-2.22628	-2.96628	-2.89711	-3.69784	-2.89899	-3.47907	-4.36991	-3.19448	-3.21002	-2.97855	-6.09372	-3.45111	-2.91034	-3.61588	-3.72179	-2.17104	-2.07211	-2.27659	-2.71554
Rgs1	-4.79106	-6.52857	-6.07401	-1.97913	-4.46471	-3.94292	-3.11559	NA	NA	-5.44853	NA	NA	-6.74057	-10.1148	-0.857651	-3.02024	-5.97167	-7.22545	-7.09554	-7.0537	NA	-0.881964	NA	-4.46538	-3.23954	-2.88049	NA	NA	-5.36014	NA	NA	-7.31695	-10.4339	-1.29209	-3.24606	-5.93594	-7.84234	-6.75222	-7.58745	NA	-1.5149	-5.82153	NA	-6.2963	-5.84325	-6.8329	-8.72827	-6.66583	NA
Rgs2	-4.86997	-4.72665	-3.84772	-5.10103	-3.20286	-4.21285	-6.78122	-6.4211	-3.23359	-4.82356	-4.38836	-5.6271	-5.44175	-4.252	-4.21157	-3.11399	-4.5182	-3.73823	-3.27287	-4.39722	-4.30075	-6.04033	-9.96025	-3.78313	-4.0099	-6.43963	-6.40774	-2.71698	-4.93197	-4.82702	-6.03262	-6.24413	-4.36257	-4.21574	-3.613	-4.41472	-4.57623	-3.19985	-4.97946	-5.19477	-6.10819	-3.44173	-4.44973	-3.99919	-5.38728	-3.44467	-3.9229	-3.81704	-3.66095
Rgs3	NA	-7.49225	-6.95093	-5.574	-7.76291	-8.93713	-8.16232	-7.09944	-8.75625	-9.06035	-6.98383	-7.85456	-7.92369	-10.1987	-6.87811	-10.0933	-9.1155	-9.30524	-9.08688	-6.06484	-6.67873	-8.54538	-7.30502	-7.1511	-8.5358	-7.02937	-5.93406	-8.13051	-8.77348	-6.23424	-7.46186	-6.33289	-8.69178	-6.38417	-9.23698	-8.2148	-9.6442	-8.51672	-6.02035	-6.98595	-7.81554	-7.84273	-6.02471	-7.22713	-3.94726	-5.9235	-4.21167	-6.63903	-5.98685
Rgs4	-2.02984	-1.78759	-1.87453	-3.09931	-2.29613	-1.25089	-4.42202	-1.10563	-0.606795	-1.09954	-1.98143	-1.99431	-1.55382	-2.44471	-2.87867	-1.99235	-2.06167	-2.32439	-2.1265	-2.04827	-1.87065	NA	-4.45707	-2.65485	-0.94378	-4.89874	-1.48941	-0.808042	-1.68917	-2.52458	-1.92184	-2.45973	-2.4547	-3.42436	-2.12363	-2.04861	-2.93925	-1.19332	-2.39787	-0.980976	NA	-2.64792	-1.15479	-1.57239	-3.57246	-1.07172	-2.27757	-1.01184	-1.68263
Rpl19	-2.03849	-2.13697	-1.67931	-1.48262	-2.23735	-2.15905	-3.01541	-2.91335	-3.20646	-1.75596	-1.99181	-2.31506	-2.28671	-2.81544	-2.14224	-2.25626	-2.21594	-1.99775	-1.62101	-1.81454	-1.82906	-2.16536	-2.25511	-1.87849	-1.71971	-2.49023	-2.40815	-2.7305	-2.06117	-1.77264	-1.81185	-2.16118	-2.3812	-1.77787	-1.9168	-1.70056	-1.7766	-1.12181	-1.61752	-1.68182	-2.0221	-1.95966	-2.2857	-2.03551	-1.99516	-2.29346	-1.76404	-1.8817	-1.58593
Slc32a1	-9.47357	-8.86875	-5.45627	-4.41882	-6.38933	-6.88499	-5.66702	NA	-7.37308	-6.60757	-5.91058	-9.39341	-8.99014	-3.05445	-3.33781	-6.36969	-8.3641	-5.37098	-7.28795	-8.87569	-8.40922	-3.24163	-7.59079	-5.28211	-7.70035	-5.60683	NA	-8.23303	-7.79413	-5.0627	-9.87714	-9.4489	-2.66435	-3.44676	-6.63202	-8.45356	-6.01577	-6.56387	-9.61545	-9.39499	-3.81447	-5.43782	-7.44348	-6.40617	-6.82501	-7.63416	-9.65166	-5.84412	NA
Slc6a2	-4.3158	-5.06111	-2.25204	-3.25584	-4.11849	-2.38029	-3.76831	-2.45581	-1.53132	-2.86282	-2.40005	-4.62482	-3.18717	-2.34522	-4.02834	-5.49865	-3.73435	-3.1379	-4.51984	-4.58158	-2.87342	NA	-4.05504	-4.18772	-1.46017	-3.68233	-2.34678	-1.2311	-2.52164	-2.50925	-3.98073	-3.90508	-2.31841	-4.05799	-6.3683	-3.78417	-3.98922	-4.1876	-5.15748	-3.22642	NA	-2.26947	-2.3491	-1.74514	-4.45278	-1.21047	-2.2221	-1.53078	-1.51594
Slc9a3r1	-5.68596	-5.77695	-5.92071	-5.99634	-5.36804	-6.64665	-4.63323	-5.5939	NA	-5.3945	-6.45072	-6.34818	-6.79982	-5.71211	-4.09006	-5.00152	-7.06528	-4.51086	-6.1836	-3.91119	-7.00098	-5.81535	-5.84572	-5.69588	-6.12862	-4.85419	-5.61972	NA	-6.46178	-6.55051	-6.17872	-8.32082	-6.02902	-4.97595	-5.91969	-7.04562	-5.34654	-6.45699	-5.1458	-7.47316	-7.34731	-7.02472	-5.87385	-8.35523	-4.0204	-6.05924	-6.80965	-5.18518	-6.3775
Sst	-3.84808	-2.55274	-5.28146	-1.6443	-3.80863	-5.30425	-3.73954	-4.38776	-6.10395	-4.42932	-2.75956	-7.16758	-7.6218	-3.36908	0.516619	-4.1244	-5.0859	-3.56844	-2.06366	-5.37873	-1.04914	-1.09387	-3.34159	-3.03583	-4.5039	-2.92376	-3.70793	-5.25334	-4.07721	-2.49137	-6.38372	-7.3714	-2.78643	0.851276	-3.61015	-4.32545	-3.42973	-1.3545	-5.16813	-0.79322	-1.18208	-3.88608	-5.07844	-3.24951	-3.61948	-6.00273	-3.19834	-1.97368	NA
Syn1	-1.66382	-1.78523	-1.59789	-0.458352	-3.69323	-2.65964	-2.51391	-1.19508	-2.40991	-2.30444	-1.83542	-1.67944	-0.310024	-0.532013	-0.916536	-1.16517	-1.48262	-0.824721	-2.07906	-1.11228	-1.15122	-1.98665	0.186406	-3.61617	-2.25848	-2.48842	-1.30186	-2.30079	-2.38491	-2.08819	-0.78505	-0.859567	-0.736903	-1.20783	-0.952047	-1.35454	-0.921668	-1.74857	-1.65099	-1.22767	-2.42149	-2.11612	-1.0707	-0.859749	-2.26621	-0.812456	-2.01334	-1.03034	-1.87152
Tac1	-3.33266	-6.1593	-3.85949	-1.81901	-4.62524	-3.74948	-3.11534	-7.97031	-1.28472	-6.0085	-4.12478	-7.64937	-7.67541	-6.31198	-0.820651	-3.34567	-6.24813	-5.60136	-6.15242	-6.98098	-4.0779	-1.64245	NA	-4.57335	-3.6416	-3.37902	-7.93369	-1.30002	-6.00643	-4.55624	-7.65522	-8.88517	-6.47374	-1.27118	-3.80446	-5.97627	-6.36411	-5.97848	-7.87973	-4.48003	-2.2432	-5.30945	-7.82599	-6.39814	-5.34889	-6.69333	-5.05806	-5.41851	NA
Th	0.386835	0.670809	1.6148	0.537783	0.226106	0.660052	-2.27944	0.170227	2.89821	0.48609	0.811195	0.533735	1.03981	-0.0873652	-1.56186	-0.303755	-0.157272	-0.834002	0.0136227	-0.393677	0.456653	-2.27916	-2.44662	0.498972	1.87011	-1.82137	0.855695	3.89352	0.443048	0.433904	0.925775	-0.150314	-0.0602524	-1.49718	-0.483278	0.318551	-0.615573	0.377177	0.0427556	0.442191	-3.29796	0.884015	0.864065	0.86338	0.811121	0.800024	0.715942	0.689083	0.543442
[truncated: 143 more columns]
